# Supplementary material for: An efficient direct phosphinylation and alkylation of ketones to construct C–P and C–C bonds: access to α,α-disubstituted γ-ketophosphine oxides
Source: Royal Society of Chemistry journal article supplement (doi:10.1039/d2qo01749k), 2022-12-02

## Supporting Information

# An Efficient Direct Phosphinylation and Alkylation of Ketone to Construct C-P and C-C bonds: Access to $\alpha,\alpha$ -Disubstituted $\gamma$ -Ketophosphine Oxides

Xiao-Hong Wei,\* Xiao-Hong Wang, † Chun-Yuan Bai, † Ya-Wen Xue, Ping Zhang,  
Yan-Bin Wang and Qiong Su\*

*Key Laboratory of Environment-Friendly Composite Materials of the State Ethnic Affairs Commission, Key Laboratory for Utility of Environment-Friendly Composite Materials and Biomass in University of Gansu Province, Gansu Provincial Biomass Function Composites Engineering Research Center, College of Chemical Engineering, Northwest Minzu University. No. 1, Northwest Xincun, Lanzhou, 730030, P.R. China.*

† These authors contributed equally to this work.

E-mail: [weixh12@lzu.edu.cn](mailto:weixh12@lzu.edu.cn); E-mail: [hgsq@xbmu.edu.cn](mailto:hgsq@xbmu.edu.cn)

### Contents

|                                                                                 |    |
|---------------------------------------------------------------------------------|----|
| General .....                                                                   | 2  |
| Experimental Section .....                                                      | 2  |
| 1. General procedure for synthesis of $\gamma$ -ketophosphine oxides .....      | 2  |
| 2. Synthesis of <b>4</b> .....                                                  | 2  |
| 2. Synthesis of <b>5</b> .....                                                  | 3  |
| 3. Synthesis of <b>6</b> .....                                                  | 3  |
| 4. Crystal structure for <b>3fa</b> .....                                       | 4  |
| 5. Time-controlled In situ $^1\text{H}$ and $^{31}\text{P}$ NMR spectra .....   | 6  |
| 6. Analytical data of products .....                                            | 7  |
| $^1\text{H}$ , $^{13}\text{C}$ and $^{31}\text{P}$ NMR Spectra of Products..... | 19 |



mL toluene under N<sub>2</sub> atmosphere and stirred at room temperature for 10 min, then 0.5 mmol diphenylphosphine oxide and 0.5 mmol alkynes were added and the mixture was stirred at 100 °C overnight. After removal of the solvent, the residues were passed through a short silica chromatography to afford the pure product diphenyl(1-phenylvinyl)phosphine oxide **4**.

## 2. Synthesis of **5**<sup>2</sup>

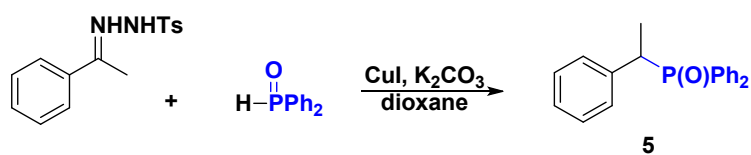

An oven-dried schlenk tube was charged with diphenylphosphine oxide (1.0 mmol), N-tosylhydrazones (1.2 equiv), CuI (10 mol %), and K<sub>2</sub>CO<sub>3</sub> (3.0 equiv) in dioxane at reflux under dry argon for 5 h. then the crude product was purified by column chromatography on a short silica gel column to afford the pure product diphenyl(1-phenylethyl)phosphine oxide **5**.

## 3. Synthesis of **6**<sup>3</sup>

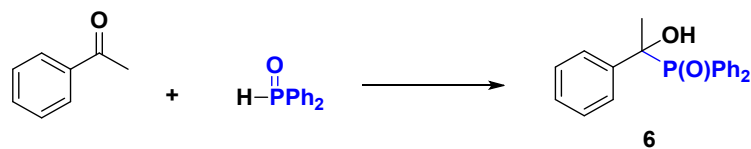

A mixture of diphenylphosphine oxide (1.0 mmol) and acetophenone (1.05 mmol) as rubbed with a spatula in a round-bottomed flask (20–25 °C, 15 min, argon atmosphere) and then stirred under the same conditions for 24 h to give a solid product. The latter was washed with Et<sub>2</sub>O (2 × 0.3 mL) and dried in vacuum to afford (1-hydroxy-1-phenylethyl)diphenylphosphine oxide **6**.

---

2. Chen Z-S, Zhou Z-Z, Hua H-L, Duan X-H, Luo J-Y, Wang J, Zhou P-X, Liang Y-M. Reductive coupling reactions: a new strategy for C(sp<sup>3</sup>)–P bond formation. *Tetrahedron* **2013**, *69*, 1065-1068.

3. Gusarova NK, Ivanova NI, Khrapova KO, Volkov PA, Telezhkin AA, Larina LI, Afonin AV, Pavlov DV, Trofimov BA. Catalyst- and Solvent-Free Hydrophosphorylation of Ketones with Secondary Phosphine Oxides: Green Synthesis of Tertiary α-Hydroxyphosphine Oxides. *Synthesis* **2020**, *52*, 2224-2232.

## 4. Crystal structure for 3fa

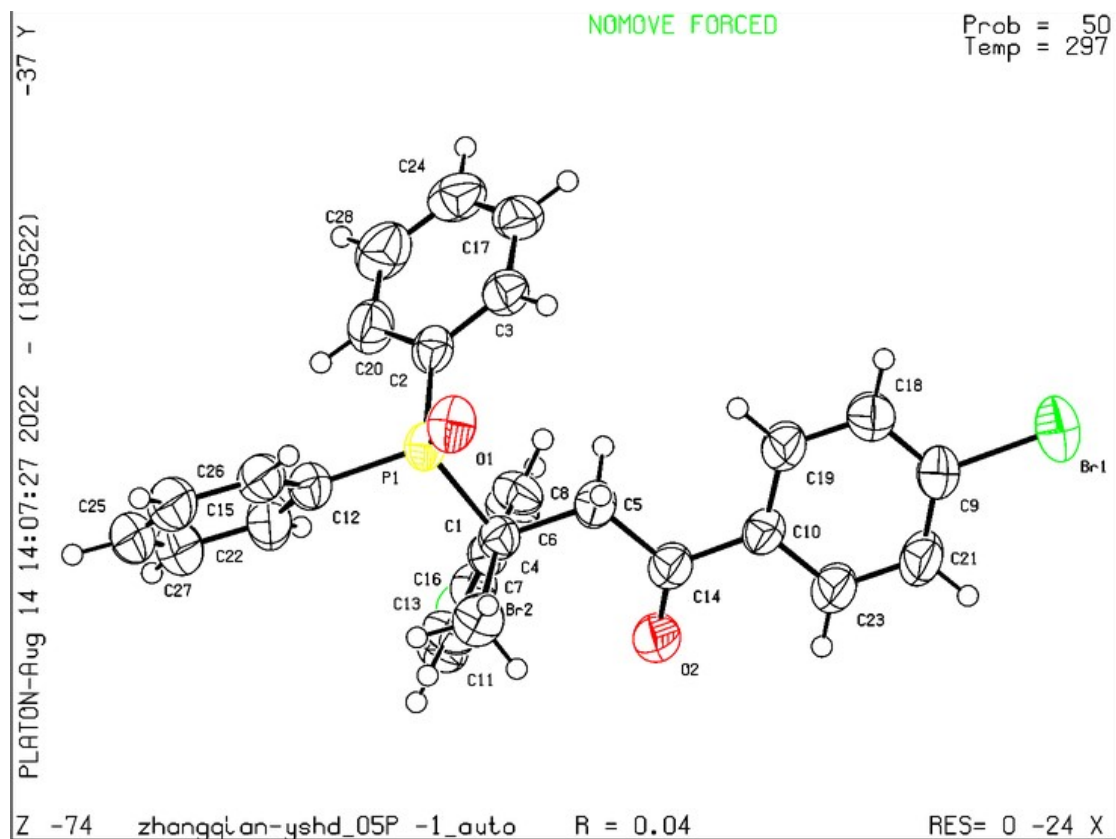

CCDC 2201338 (thermal ellipsoid is set at 50% probability)

| <b>Table 1 Crystal data and structure refinement for 3pa</b>                                                                                                            |                                                                  |
|-------------------------------------------------------------------------------------------------------------------------------------------------------------------------|------------------------------------------------------------------|
| Identification code                                                                                                                                                     | zhangqian-yshd_0520-4_auto                                       |
| Empirical formula                                                                                                                                                       | C <sub>28</sub> H <sub>23</sub> Br <sub>2</sub> O <sub>2</sub> P |
| Formula weight                                                                                                                                                          | 582.25                                                           |
| Temperature/K                                                                                                                                                           | 296.85(14)                                                       |
| Crystal system                                                                                                                                                          | triclinic                                                        |
| Space group                                                                                                                                                             | P-1                                                              |
|                                                                                                                                                                         | 13.37312(19)                                                     |
| Unit cell dimensions                                                                                                                                                    | a = 9.4895(2) Å                                                  |
|                                                                                                                                                                         | 10.7941(2) Å                                                     |
|                                                                                                                                                                         | c = 13.7701(3) Å                                                 |
|                                                                                                                                                                         | α = 96.2258(14) °                                                |
|                                                                                                                                                                         | β = 94.9520(14) °                                                |
|                                                                                                                                                                         | γ = 113.640(2) °                                                 |
| Volume                                                                                                                                                                  | 1234.72(4) Å <sup>3</sup>                                        |
| Z                                                                                                                                                                       | 2                                                                |
| Calculated density                                                                                                                                                      | 1.566 g/cm <sup>3</sup>                                          |
| Absorption coefficient                                                                                                                                                  | 4.960 mm <sup>-1</sup>                                           |
| F(000)                                                                                                                                                                  | 584.0                                                            |
| Crystal size                                                                                                                                                            | 0.09 × 0.07 × 0.05 mm <sup>3</sup>                               |
| Radiation                                                                                                                                                               | Cu Kα (λ = 1.54184)                                              |
| The range for data collection/°                                                                                                                                         | 6.718 to 155.198                                                 |
| Index ranges                                                                                                                                                            | -11 ≤ h ≤ 11, -13 ≤ k ≤ 13, -10 ≤ l ≤ 16                         |
| Reflections collected                                                                                                                                                   | 14374                                                            |
| Independent reflections                                                                                                                                                 | 4995 [R <sub>int</sub> = 0.0477, R <sub>sigma</sub> = 0.0411]    |
| Data/restraints/parameters                                                                                                                                              | 4995/0/299                                                       |
| Goodness-of-fit on F <sup>2</sup>                                                                                                                                       | 1.076                                                            |
| Final R indexes [I ≥ 2σ (I)]                                                                                                                                            | R <sub>1</sub> = 0.0446, wR <sub>2</sub> = 0.1255                |
| Final R indexes [all data]                                                                                                                                              | R <sub>1</sub> = 0.0492, wR <sub>2</sub> = 0.1291                |
| Largest diff. peak/hole                                                                                                                                                 | 0.53/-1.05 e Å <sup>-3</sup>                                     |
| <b>Crystallization:</b> Crystals of compound <b>3pa</b> suitable for X-ray analysis were grown from the solvent of chloroform/ethyl acetate by slow evaporation method. |                                                                  |

## 5. Time-controlled In situ $^1\text{H}$ and $^{31}\text{P}$ NMR spectra

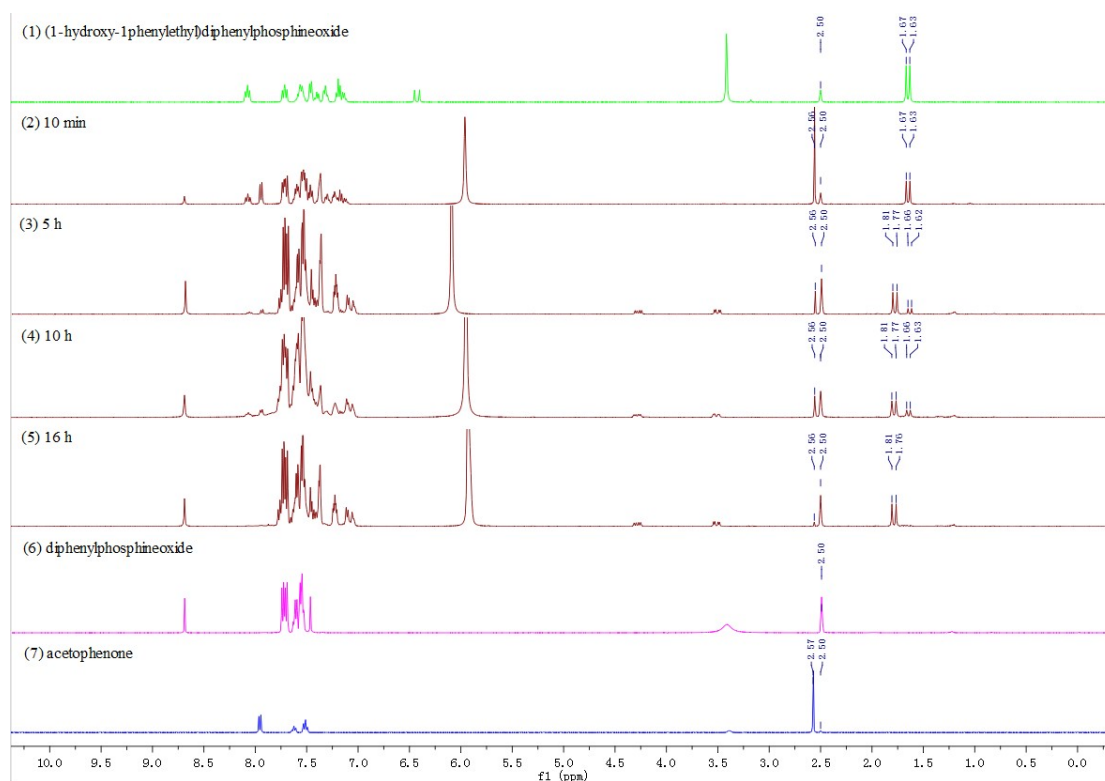

### In situ $^1\text{H}$ NMR spectra

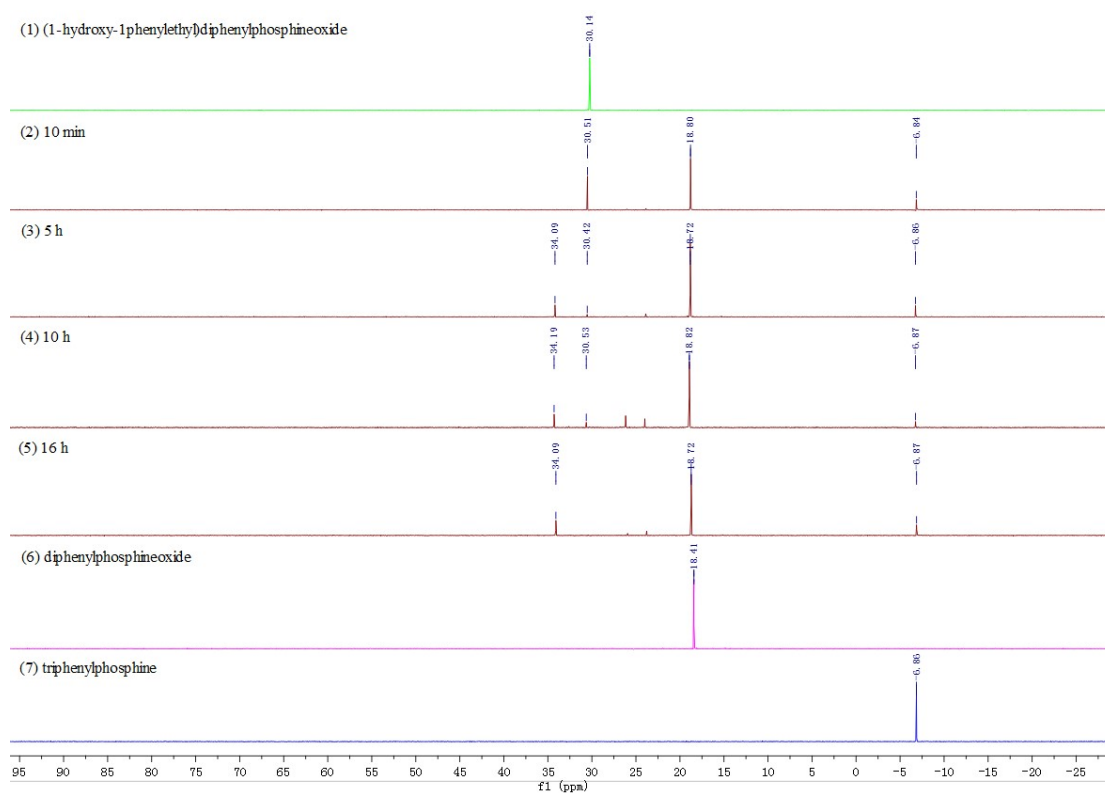

### In situ $^{31}\text{P}$ NMR spectra

## 6. Analytical data of products

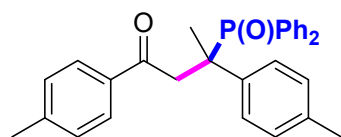

**3aa**

Purification was performed by column chromatography (petroleum ether/ethyl acetate = 1/1) to afford 22.4 mg (99%) of **3aa**. White solid.  $^1\text{H NMR}$  (400 MHz,  $\text{CDCl}_3$ )  $\delta$  7.75 (d,  $J = 8.2$  Hz, 2H), 7.69 – 7.56 (m, 4H), 7.56 – 7.45 (m, 2H), 7.45 – 7.34 (m, 4H), 7.19 (d,  $J = 8.0$  Hz, 2H), 6.98 (d,  $J = 8.1$  Hz, 2H), 6.92 – 6.85 (m, 2H), 4.01 (dd,  $J = 17.8, 7.9$  Hz, 1H), 3.82 (dd,  $J = 17.7, 5.1$  Hz, 1H), 2.37 (s, 3H), 2.31 (d,  $J = 6.2$  Hz, 3H), 1.88 (d,  $J = 16.3$  Hz, 3H).  $^{13}\text{C NMR}$  (101 MHz,  $\text{CDCl}_3$ )  $\delta$  195.91 (d,  $J = 15.9$  Hz), 143.74, 136.38 (d,  $J = 3.5$  Hz), 135.41 (d,  $J = 3.4$  Hz), 135.11 (d,  $J = 2.3$  Hz), 133.07 (d,  $J = 7.6$  Hz), 132.91 (d,  $J = 7.8$  Hz), 131.73 (d,  $J = 2.7$  Hz), 131.68 (d,  $J = 2.7$  Hz), 129.11, 128.43 (d,  $J = 2.8$  Hz), 128.24 (d,  $J = 4.8$  Hz), 127.97 (d,  $J = 2.4$  Hz), 127.96, 127.88 (d,  $J = 0.9$  Hz), 44.51 (d,  $J = 64.0$  Hz), 44.19, 41.77, 21.56, 21.02, 19.72.  $^{31}\text{P NMR}$  (162 MHz,  $\text{CDCl}_3$ )  $\delta$  35.24. HRMS (ESI) Calcd. for  $\text{C}_{30}\text{H}_{30}\text{O}_2\text{P}$   $[\text{M}+\text{H}]^+$ : 453.1978, found 453.1970.

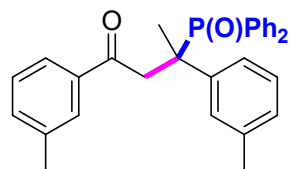

**3ba**

Purification was performed by column chromatography (petroleum ether/ethyl acetate = 1/1) to afford 21.0 mg (93%) of **3aa**. White solid.  $^1\text{H NMR}$  (400 MHz,  $\text{CDCl}_3$ )  $\delta$  7.69 – 7.56 (m,  $J = 9.8, 7.8$  Hz, 6H), 7.55 – 7.47 (m, 2H), 7.44 – 7.28 (m, 6H), 7.12 – 7.02 (m, 2H), 6.84 (d,  $J = 7.5$  Hz, 1H), 6.69 (s, 1H), 4.01 (dd,  $J = 17.9, 7.9$  Hz, 1H), 3.86 (dd,  $J = 17.8, 5.1$  Hz, 1H), 2.36 (s, 3H), 2.16 (s, 3H), 1.87 (d,  $J = 16.3$  Hz, 3H).  $^{13}\text{C NMR}$  (101 MHz,  $\text{CDCl}_3$ )  $\delta$  196.44 (d,  $J = 15.9$  Hz), 138.22 (d,  $J = 2.0$  Hz), 137.61 (d,  $J = 2.3$  Hz), 136.90 (d,  $J = 3.0$  Hz), 133.69, 133.08 (d,  $J = 7.6$  Hz), 132.93 (d,  $J = 7.8$  Hz), 131.79 (d,  $J = 2.7$  Hz), 131.73 (d,  $J = 2.8$  Hz), 129.84 (d,  $J = 66.8$  Hz), 129.37 (d,  $J = 4.8$  Hz), 128.92 (d,  $J = 66.7$  Hz), 128.35 (d,  $J = 5.3$  Hz), 127.83, 127.61 (d,  $J = 3.3$  Hz), 127.54 (d,  $J = 2.9$  Hz), 125.39 (d,  $J = 5.0$  Hz), 125.04, 53.38, 44.80 (d,  $J = 63.6$  Hz), 41.98, 21.44, 21.27, 19.53.  $^{31}\text{P NMR}$  (162 MHz,  $\text{CDCl}_3$ )  $\delta$  35.62. HRMS (ESI) Calcd. for  $\text{C}_{30}\text{H}_{30}\text{O}_2\text{P}$   $[\text{M}+\text{H}]^+$ : 453.1978, found 453.1970.

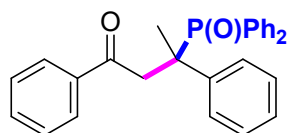

**3ca**

Purification was performed by column chromatography (petroleum ether/ethyl acetate = 1/1) to afford 17.2 mg (81%) of **3aa**. White solid. **<sup>1</sup>H NMR (400 MHz, CDCl<sub>3</sub>)** δ 7.85 (d, *J* = 7.5 Hz, 2H), 7.69 – 7.31 (m, 13H), 7.24 – 7.13 (m, 3H), 7.08 – 6.99 (m, 2H), 4.12 (dd, *J* = 17.8, 8.0 Hz, 1H), 3.82 (dd, *J* = 17.9, 5.1 Hz, 1H), 1.91 (d, *J* = 16.3 Hz, 3H). **<sup>13</sup>C NMR (101 MHz, CDCl<sub>3</sub>)** δ 196.18 (d, *J* = 15.9 Hz, 1H), 138.53 (d, *J* = 3.4 Hz, 1H), 137.50 (d, *J* = 2.2 Hz, 1H), 133.01 (d, *J* = 7.6 Hz, 3H), 132.98, 132.82 (d, *J* = 7.8 Hz, 2H), 131.84 (d, *J* = 2.7 Hz, 1H), 131.76 (d, *J* = 2.7 Hz, 1H), 129.88 (d, *J* = 48.3 Hz, 0H), 128.96 (d, *J* = 47.4 Hz, 1H), 128.46, 128.32 (d, *J* = 4.8 Hz, 2H), 127.95 (d, *J* = 1.9 Hz, 2H), 127.81 (d, *J* = 2.9 Hz, 3H), 127.80, 127.67 (d, *J* = 2.8 Hz, 2H), 126.86 (d, *J* = 3.3 Hz, 1H), 44.84 (d, *J* = 63.5 Hz, 1H), 42.06, 19.70. **<sup>31</sup>P NMR (162 MHz, CDCl<sub>3</sub>)** δ 35.38. **HRMS (ESI)** Calcd. for C<sub>28</sub>H<sub>26</sub>O<sub>2</sub>P [M+H]<sup>+</sup>: 425.1665, found 425.1660.

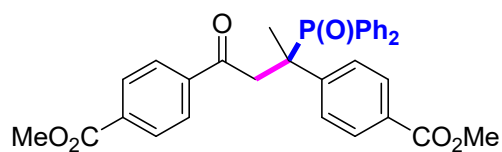

**3da**

Purification was performed by column chromatography (petroleum ether/ethyl acetate = 1/1) to afford 22.1 mg (82%) of **3aa**. White solid. **<sup>1</sup>H NMR (400 MHz, CDCl<sub>3</sub>)** δ 8.07 (d, *J* = 8.4 Hz, 2H), 7.87 (t, *J* = 8.4 Hz, 4H), 7.77 – 7.66 (m, 2H), 7.66 – 7.54 (m, 3H), 7.54 – 7.44 (m, 3H), 7.44 – 7.33 (m, 2H), 7.14 (dd, *J* = 8.6, 2.0 Hz, 2H), 4.20 (dd, *J* = 18.2, 7.8 Hz, 1H), 3.92 (d, *J* = 13.0 Hz, 6H), 3.83 (dd, *J* = 18.1, 4.8 Hz, 1H), 1.92 (d, *J* = 16.0 Hz, 3H). **<sup>13</sup>C NMR (101 MHz, CDCl<sub>3</sub>)** δ 195.55 (d, *J* = 15.7 Hz), 166.82, 166.07, 144.32, 140.35, 133.94, 132.93, 132.86, 132.70, 132.62, 132.19 (d, *J* = 2.6 Hz), 132.12 (d, *J* = 2.7 Hz), 129.81, 129.47 (d, *J* = 27.4 Hz), 128.93 (d, *J* = 2.6 Hz), 128.61 (d, *J* = 12.9 Hz), 128.49 (d, *J* = 16.3 Hz), 128.36, 128.30, 128.25, 128.21, 128.09, 127.75, 52.45, 52.08, 45.32 (d, *J* = 62.2 Hz), 42.89, 19.81. **<sup>31</sup>P NMR (162 MHz, CDCl<sub>3</sub>)** δ 34.68. **HRMS (ESI)** Calcd. for C<sub>32</sub>H<sub>30</sub>O<sub>6</sub>P [M+H]<sup>+</sup>: 541.1775, found 541.1775.



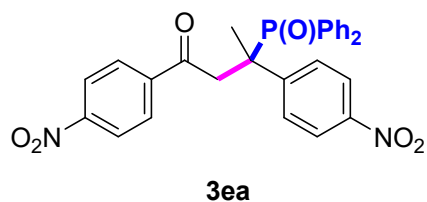

Purification was performed by column chromatography (petroleum ether/ethyl acetate = 1/1) to afford 18.8 mg (73%) of **3aa**. Yellow solid.  $^1\text{H NMR}$  (400 MHz,  $\text{CDCl}_3$ )  $\delta$  8.32 – 8.23 (m, 2H), 8.02 (dd,  $J = 21.9, 8.8$  Hz, 4H), 7.88 – 7.79 (m, 2H), 7.67 – 7.48 (m, 6H), 7.45 – 7.28 (m, 4H), 4.36 (dd,  $J = 18.5, 7.8$  Hz, 1H), 3.75 (dd,  $J = 18.5, 4.7$  Hz, 1H), 1.95 (d,  $J = 16.0$  Hz, 3H).  $^{13}\text{C NMR}$  (101 MHz,  $\text{CDCl}_3$ )  $\delta$  194.31 (d,  $J = 15.3$  Hz), 150.46, 146.97 (d,  $J = 3.7$  Hz), 146.54 (d,  $J = 3.5$  Hz), 141.09 (d,  $J = 2.0$  Hz), 132.76 (d,  $J = 7.9$  Hz), 132.59 (d,  $J = 2.8$  Hz), 132.47 (d,  $J = 2.8$  Hz), 132.37 (d,  $J = 8.0$  Hz), 129.03 (d,  $J = 8.0$  Hz), 128.93, 128.88, 128.67 (d,  $J = 11.3$  Hz), 128.38 (d,  $J = 11.4$  Hz), 128.09 (d,  $J = 10.1$  Hz), 123.92, 122.80 (d,  $J = 2.6$  Hz), 45.48 (d,  $J = 61.1$  Hz), 43.56, 20.03.  $^{31}\text{P NMR}$  (162 MHz,  $\text{CDCl}_3$ )  $\delta$  34.19. HRMS (ESI) Calcd. for  $\text{C}_{28}\text{H}_{24}\text{N}_2\text{O}_6\text{P}$   $[\text{M}+\text{H}]^+$ : 515.1366, found 515.1368.

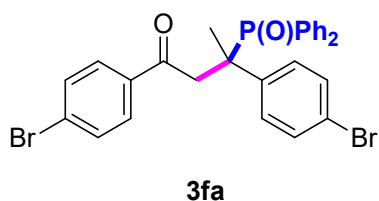

Purification was performed by column chromatography (petroleum ether/ethyl acetate = 1/1) to afford 24.6 mg (85%) of **3aa**. White solid.  $^1\text{H NMR}$  (400 MHz,  $\text{CDCl}_3$ )  $\delta$  7.76 – 7.66 (m, 4H), 7.63 – 7.43 (m, 8H), 7.42 – 7.34 (m, 2H), 7.31 (d,  $J = 8.3$  Hz, 2H), 6.99 – 6.87 (m, 2H), 4.05 (dd,  $J = 18.0, 7.8$  Hz, 1H), 3.71 (dd,  $J = 17.9, 4.9$  Hz, 1H), 1.86 (d,  $J = 16.2$  Hz, 3H).  $^{13}\text{C NMR}$  (101 MHz,  $\text{CDCl}_3$ )  $\delta$  195.04 (d,  $J = 15.7$  Hz), 137.87 (d,  $J = 3.5$  Hz), 135.94 (d,  $J = 2.1$  Hz), 132.86 (d,  $J = 7.7$  Hz), 132.61 (d,  $J = 7.9$  Hz), 132.07 (d,  $J = 2.7$  Hz), 132.00 (d,  $J = 2.7$  Hz), 131.81, 130.77 (d,  $J = 2.7$  Hz), 129.92 (d,  $J = 4.7$  Hz), 129.53 (d,  $J = 29.0$  Hz), 129.30, 128.60 (d,  $J = 28.0$  Hz), 128.37, 128.23 (d,  $J = 11.1$  Hz), 128.06 (d,  $J = 11.2$  Hz), 121.09 (d,  $J = 4.1$  Hz), 44.58 (d,  $J = 63.2$  Hz), 42.08, 19.71.  $^{31}\text{P NMR}$  (162 MHz,  $\text{CDCl}_3$ )  $\delta$  34.61. HRMS (ESI) Calcd. for  $\text{C}_{28}\text{H}_{24}\text{Br}_2\text{O}_2\text{P}$   $[\text{M}+\text{H}]^+$ : 580.9875, found 580.9887.

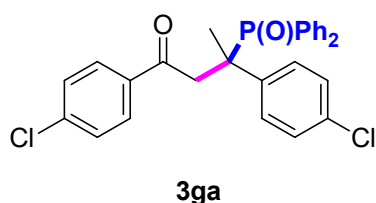

Purification was performed by column chromatography (petroleum ether/ethyl acetate = 1/1) to afford 20.4 mg (83%) of **3aa**. White solid.  $^1\text{H NMR}$  (400 MHz,  $\text{CDCl}_3$ )  $\delta$  7.80 – 7.68 (m, 4H), 7.63 – 7.53 (m, 3H), 7.53 – 7.44 (m, 3H), 7.42 – 7.34 (m, 4H), 7.16 (d,  $J = 8.4$  Hz, 2H), 6.99 (dd,  $J = 8.8, 2.2$  Hz, 2H), 4.06 (dd,  $J = 17.1, 7.1$  Hz, 1H), 3.71 (dd,  $J = 17.9, 5.0$  Hz, 1H), 1.87 (d,  $J = 16.2$  Hz, 3H).  $^{13}\text{C NMR}$  (101 MHz,  $\text{CDCl}_3$ )  $\delta$  194.91 (d,  $J = 15.7$  Hz), 139.67, 137.36 (d,  $J = 3.6$  Hz), 135.58 (d,  $J = 2.2$  Hz), 132.91 (d,  $J = 7.7$  Hz), 132.87, 132.66 (d,  $J = 7.9$  Hz), 132.09 (d,  $J = 2.7$  Hz), 132.01 (d,  $J = 2.7$  Hz), 129.62 (d,  $J = 30.3$  Hz), 129.60 (d,  $J = 4.7$  Hz), 129.24, 128.85, 128.55, 128.25 (d,  $J = 11.1$  Hz), 128.09 (d,  $J = 11.2$  Hz), 127.87 (d,  $J = 2.7$  Hz), 44.53 (d,  $J = 63.3$  Hz), 42.14, 19.79.  $^{31}\text{P NMR}$  (162 MHz,  $\text{CDCl}_3$ )  $\delta$  34.74. HRMS (ESI) Calcd. for  $\text{C}_{28}\text{H}_{24}\text{Cl}_2\text{O}_2\text{P}$   $[\text{M}+\text{H}]^+$ : 493.0885, found 493.0882.

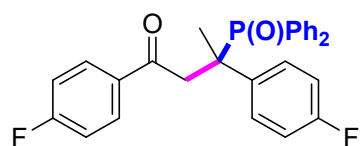

**3ha**

Purification was performed by column chromatography (petroleum ether/ethyl acetate = 1/1) to afford 20.2 mg (88%) of **3aa**. White solid.  $^1\text{H NMR}$  (400 MHz,  $\text{CDCl}_3$ )  $\delta$  7.92 – 7.82 (m, 2H), 7.72 (t,  $J = 9.2$  Hz, 2H), 7.64 – 7.54 (m, 3H), 7.52 – 7.43 (m, 3H), 7.43 – 7.33 (m, 2H), 7.12 – 6.98 (m, 4H), 6.88 (t,  $J = 8.6$  Hz, 2H), 4.09 (dd,  $J = 17.7, 7.9$  Hz, 1H), 3.70 (dd,  $J = 17.7, 5.0$  Hz, 1H), 1.88 (d,  $J = 16.3$  Hz, 3H).  $^{13}\text{C NMR}$  (101 MHz,  $\text{CDCl}_3$ )  $\delta$  194.67 (d,  $J = 15.8$  Hz), 165.71 (d,  $J = 255.2$  Hz), 134.45 (t,  $J = 3.3$  Hz), 133.83 (t,  $J = 2.7$  Hz), 132.96 (d,  $J = 7.6$  Hz), 132.67 (d,  $J = 7.9$  Hz), 132.04 (d,  $J = 2.7$  Hz), 131.94 (d,  $J = 2.7$  Hz), 130.50 (d,  $J = 9.4$  Hz), 129.91 (d,  $J = 4.9$  Hz), 129.83 (d,  $J = 4.8$  Hz), 128.86 (d,  $J = 31.7$  Hz), 128.23 (d,  $J = 11.0$  Hz), 128.05 (d,  $J = 11.1$  Hz), 115.63 (d,  $J = 21.9$  Hz), 114.73 (d,  $J = 2.7$  Hz), 114.52 (d,  $J = 2.7$  Hz), 44.38 (d,  $J = 63.9$  Hz), 42.09, 19.98.  $^{31}\text{P NMR}$  (162 MHz,  $\text{CDCl}_3$ )  $\delta$  35.08. HRMS (ESI) Calcd. for  $\text{C}_{28}\text{H}_{24}\text{F}_2\text{O}_2\text{P}$   $[\text{M}+\text{H}]^+$ : 461.1476, found 461.1476.

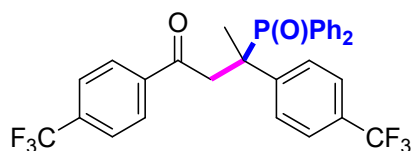

**3ia**

Purification was performed by column chromatography (petroleum ether/ethyl acetate = 1/1) to afford 12.6 mg (45%) of **3aa**. Yellow solid.  $^1\text{H NMR}$  (400 MHz,  $\text{CDCl}_3$ )  $\delta$  7.93 (d,  $J = 8.1$  Hz, 2H), 7.81 – 7.66 (m, 4H), 7.60 – 7.35 (m, 10H), 7.22 (d,  $J = 7.1$

Hz, 2H), 4.25 (dd,  $J = 18.2, 7.8$  Hz, 1H), 3.75 (dd,  $J = 18.1, 4.9$  Hz, 1H), 1.93 (d,  $J = 16.1$  Hz, 3H).  $^{13}\text{C}$  NMR (101 MHz,  $\text{CDCl}_3$ )  $\delta$  195.17 (d,  $J = 15.6$  Hz), 143.12 (d,  $J = 2.1$  Hz), 139.78, 134.56 (d,  $J = 32.7$  Hz), 132.88 (d,  $J = 7.8$  Hz), 132.53 (d,  $J = 8.0$  Hz), 132.31 (d,  $J = 2.7$  Hz), 132.20 (d,  $J = 2.7$  Hz), 130.99 (d,  $J = 20.7$  Hz), 129.38 (q,  $J = 8.8$  Hz), 129.21 (d,  $J = 3.2$  Hz), 128.89 (d,  $J = 3.3$  Hz), 128.84 (d,  $J = 4.2$  Hz), 128.49, 128.42 (d,  $J = 6.3$  Hz), 128.19, 128.19 (d,  $J = 11.3$  Hz), 125.70 (q,  $J = 3.7$  Hz), 125.45 (d,  $J = 13.8$  Hz), 124.75 (d,  $J = 11.9$  Hz), 124.62 (q,  $J = 3.8$  Hz), 124.62, 45.08 (d,  $J = 62.2$  Hz), 42.88, 19.86.  $^{31}\text{P}$  NMR (162 MHz,  $\text{CDCl}_3$ )  $\delta$  34.74. HRMS (ESI) Calcd. for  $\text{C}_{30}\text{H}_{24}\text{F}_6\text{O}_2\text{P}$   $[\text{M}+\text{H}]^+$ : 561.1413, found 561.1420.

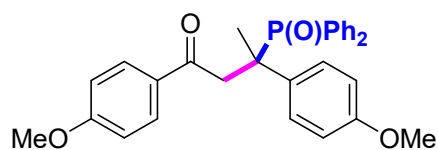

**3ja**

Purification was performed by column chromatography (petroleum ether/ethyl acetate = 1/2) to afford 19.3 mg (80%) of **3aa**. White solid.  $^1\text{H}$  NMR (400 MHz,  $\text{CDCl}_3$ )  $\delta$  7.81 (d,  $J = 8.2$  Hz, 2H), 7.67 – 7.54 (m, 4H), 7.53 – 7.32 (m, 6H), 6.91 (d,  $J = 7.3$  Hz, 2H), 6.85 (d,  $J = 8.2$  Hz, 2H), 6.70 (d,  $J = 8.5$  Hz, 2H), 3.94 (dd,  $J = 17.4, 7.9$  Hz, 1H), 3.82 (s, 3H), 3.79 – 3.69 (m, 4H), 1.84 (d,  $J = 16.4$  Hz, 3H).  $^{13}\text{C}$  NMR (101 MHz,  $\text{CDCl}_3$ )  $\delta$  194.94 (d,  $J = 16.0$  Hz, 1H), 163.37, 158.33 (d,  $J = 3.2$  Hz, 0H), 133.08 (d,  $J = 7.6$  Hz, 2H), 132.89 (d,  $J = 7.9$  Hz, 1H), 131.78 (d,  $J = 2.7$  Hz, 1H), 131.72 (d,  $J = 2.7$  Hz, 1H), 130.77 (d,  $J = 2.9$  Hz, 1H), 130.57 (d,  $J = 13.6$  Hz, 0H), 130.44 (d,  $J = 6.9$  Hz, 0H), 130.17, 129.52 (d,  $J = 4.9$  Hz, 2H), 128.89 (d,  $J = 12.9$  Hz, 1H), 128.06, 127.96, 127.85, 113.58, 113.06 (d,  $J = 2.7$  Hz, 1H), 55.43, 55.13, 44.26 (d,  $J = 64.7$  Hz, 1H), 41.42, 19.86.  $^{31}\text{P}$  NMR (162 MHz,  $\text{CDCl}_3$ )  $\delta$  35.45. HRMS (ESI) Calcd. for  $\text{C}_{30}\text{H}_{30}\text{O}_4\text{P}$   $[\text{M}+\text{H}]^+$ : 485.1876, found 485.1867.

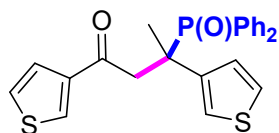

**3ka**

Purification was performed by column chromatography (petroleum ether/ethyl acetate = 1/1) to afford 17.0 mg (78%) of **3aa**. Yellow solid.  $^1\text{H}$  NMR (400 MHz,  $\text{CDCl}_3$ )  $\delta$  7.99 – 7.96 (m,  $J = 2.8, 1.1$  Hz, 1H), 7.73 – 7.66 (m, 2H), 7.64 – 7.43 (m, 6H), 7.43 – 7.36 (m,  $J = 8.7, 3.0$  Hz, 3H), 7.25 – 7.17 (m, 2H), 6.86 – 6.77 (m,  $J = 20.3, 11.0, 3.2$  Hz, 2H), 3.80 (dd,  $J = 16.5, 7.5$  Hz, 1H), 3.63 (dd,  $J = 16.5, 5.7$  Hz, 1H), 1.84 (d,  $J =$

16.2 Hz, 3H).  $^{13}\text{C}$  NMR (101 MHz,  $\text{CDCl}_3$ )  $\delta$  191.02 (d,  $J = 15.8$  Hz), 142.96 (d,  $J = 2.3$  Hz), 140.11 (d,  $J = 3.4$  Hz), 132.99 (d,  $J = 7.7$  Hz), 132.67 (d,  $J = 8.0$  Hz), 132.20, 131.97 (d,  $J = 2.7$  Hz), 131.88 (d,  $J = 2.8$  Hz), 129.92 (d,  $J = 77.9$  Hz), 128.99 (d,  $J = 76.6$  Hz), 128.21, 128.18, 128.10, 127.99, 126.84, 126.17, 124.70 (d,  $J = 1.6$  Hz), 123.14 (d,  $J = 7.3$  Hz), 43.43, 43.26 (d,  $J = 66.2$  Hz), 20.22.  $^{31}\text{P}$  NMR (162 MHz,  $\text{CDCl}_3$ )  $\delta$  35.14. HRMS (ESI) Calcd. for  $\text{C}_{24}\text{H}_{22}\text{O}_2\text{PS}_2$   $[\text{M}+\text{H}]^+$ : 437.0793, found 437.0795.

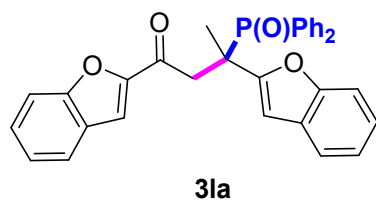

Purification was performed by column chromatography (petroleum ether/ethyl acetate = 1/1) to afford 18.4 mg (73%) of **3aa**. White solid.  $^1\text{H}$  NMR (400 MHz,  $\text{CDCl}_3$ )  $\delta$  7.74 (dd,  $J = 17.7, 8.3$  Hz, 2H), 7.64 (d,  $J = 7.9$  Hz, 1H), 7.58 – 7.37 (m, 5H), 7.30 – 7.25 (m, 1H), 7.21 (d,  $J = 2.5$  Hz, 1H), 6.41 (d,  $J = 3.8$  Hz, 0H), 3.98 – 3.80 (m,  $J = 16.6, 6.4$  Hz, 2H), 1.83 (d,  $J = 15.1$  Hz, 1H).  $^{13}\text{C}$  NMR (101 MHz,  $\text{CDCl}_3$ )  $\delta$  187.44 (d,  $J = 15.5$  Hz), 155.52, 154.11 (d,  $J = 1.3$  Hz), 152.50 (d,  $J = 2.4$  Hz), 132.59 (d,  $J = 3.9$  Hz), 132.51 (d,  $J = 4.7$  Hz), 132.08 (d,  $J = 15.5$  Hz), 132.08, 130.09, 128.35 (d,  $J = 2.9$  Hz), 128.26 (d,  $J = 3.5$  Hz), 128.21, 128.11 (d,  $J = 2.4$  Hz), 126.91, 124.06, 123.85, 123.26, 122.91, 120.88 (d,  $J = 1.0$  Hz), 113.05, 112.45, 111.00 (d,  $J = 0.6$  Hz), 105.84 (d,  $J = 7.4$  Hz), 43.03 (d,  $J = 65.9$  Hz), 40.64, 18.27.  $^{31}\text{P}$  NMR (162 MHz,  $\text{CDCl}_3$ )  $\delta$  33.24. HRMS (ESI) Calcd. for  $\text{C}_{32}\text{H}_{26}\text{O}_4\text{P}$   $[\text{M}+\text{H}]^+$ : 505.1563, found 505.1567.

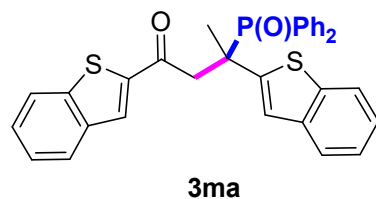

Purification was performed by column chromatography (petroleum ether/ethyl acetate = 1/1) to afford 19.5 mg (73%) of **3aa**. Yellow solid.  $^1\text{H}$  NMR (400 MHz,  $\text{CDCl}_3$ )  $\delta$  7.95 (s, 1H), 7.91 – 7.65 (m, 7H), 7.63 – 7.33 (m, 9H), 7.31 – 7.20 (m, 2H), 6.98 (d,  $J = 3.5$  Hz, 1H), 4.08 (dd,  $J = 16.5, 7.2$  Hz, 1H), 3.83 (dd,  $J = 16.4, 5.5$  Hz, 1H), 2.01 (d,  $J = 16.0$  Hz, 3H).  $^{13}\text{C}$  NMR (101 MHz,  $\text{CDCl}_3$ )  $\delta$  190.67 (d,  $J = 15.3$  Hz), 144.61 (d,  $J = 4.5$  Hz), 144.23 (d,  $J = 2.9$  Hz), 142.46, 139.34 (d,  $J = 3.0$  Hz), 138.96, 139.27 (d,  $J = 1.6$  Hz), 133.07 (d,  $J = 7.9$  Hz), 132.85 (d,  $J = 8.2$  Hz), 132.24 (d,  $J = 2.7$  Hz),

132.16 (d,  $J = 2.7$  Hz), 129.59 (d,  $J = 21.1$  Hz), 129.49, 128.92 (d,  $J = 34.6$  Hz), 128.22 (d,  $J = 5.7$  Hz), 128.13 (d,  $J = 11.4$  Hz), 127.45, 126.02, 124.92, 124.06 (d,  $J = 13.5$  Hz), 123.78 (d,  $J = 7.0$  Hz), 123.32, 122.78, 121.93, 44.59 (d,  $J = 65.7$  Hz), 44.06, 20.82.  **$^{31}\text{P}$  NMR (162 MHz,  $\text{CDCl}_3$ )**  $\delta$  35.14. **HRMS (ESI)** Calcd. for  $\text{C}_{32}\text{H}_{26}\text{O}_2\text{PS}_2$   $[\text{M}+\text{H}]^+$ : 537.1106, found 537.1120.

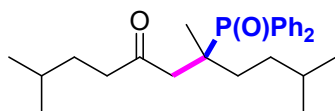

**3na**

Purification was performed by column chromatography (petroleum ether/ethyl acetate = 1/1) to afford 15.0 mg (73%) of **3aa**. White solid.  **$^1\text{H}$  NMR (400 MHz,  $\text{CDCl}_3$ )**  $\delta$  8.08 – 7.89 (m, 4H), 7.60 – 7.41 (m, 6H), 3.06 (dd,  $J = 16.2, 9.3$  Hz, 1H), 2.51 (dd,  $J = 16.2, 10.4$  Hz, 1H), 2.44 – 2.25 (m, 2H), 1.83 – 1.75 (m, 2H), 1.52 – 1.22 (m, 8H), 1.17 – 0.98 (m, 1H), 0.84 (d,  $J = 6.6$  Hz, 6H), 0.72 (dd,  $J = 13.9, 6.1$  Hz, 6H).  **$^{13}\text{C}$  NMR (101 MHz,  $\text{CDCl}_3$ )**  $\delta$  209.44 (d,  $J = 12.3$  Hz), 132.26 (d,  $J = 3.6$  Hz), 132.18 (d,  $J = 3.7$  Hz), 132.01, 131.63 (d,  $J = 2.6$  Hz), 131.53 (d,  $J = 2.8$  Hz), 131.13, 128.40 (d,  $J = 1.0$  Hz), 128.29 (d,  $J = 1.0$  Hz), 43.70, 43.03 (d,  $J = 1.2$  Hz), 40.47 (d,  $J = 68.0$  Hz), 33.29 (d,  $J = 4.6$  Hz), 32.80, 32.32, 28.60, 27.53, 22.44, 22.33, 22.31, 22.25, 21.31.  **$^{31}\text{P}$  NMR (162 MHz,  $\text{CDCl}_3$ )**  $\delta$  36.53. **HRMS (ESI)** Calcd. for  $\text{C}_{26}\text{H}_{38}\text{O}_2\text{P}$   $[\text{M}+\text{H}]^+$ : 413.2604, found 413.2602.

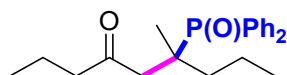

**3oa**

Purification was performed by column chromatography (petroleum ether/ethyl acetate = 1/1) to afford 14.2 mg (80%) of **3aa**. White solid.  **$^1\text{H}$  NMR (400 MHz,  $\text{CDCl}_3$ )**  $\delta$  8.07 – 7.89 (m, 4H), 7.61 – 7.42 (m, 6H), 3.03 (dd,  $J = 16.2, 9.3$  Hz, 1H), 2.50 (dd,  $J = 16.2, 10.9$  Hz, 1H), 2.42 – 2.24 (m, 2H), 1.87 – 1.66 (m, 2H), 1.54 – 1.35 (m, 6H), 1.35 – 1.12 (m, 2H), 0.84 (t,  $J = 7.4$  Hz, 3H), 0.76 (t,  $J = 7.2$  Hz, 3H).  **$^{13}\text{C}$  NMR (101 MHz,  $\text{CDCl}_3$ )**  $\delta$  209.20 (d,  $J = 12.2$  Hz), 132.22 (d,  $J = 2.2$  Hz), 132.14 (d,  $J = 2.2$  Hz), 131.66 (d,  $J = 39.8$  Hz), 131.61 (d,  $J = 2.7$  Hz), 131.53 (d,  $J = 2.7$  Hz), 130.77 (d,  $J = 40.5$  Hz), 128.40, 128.29, 46.83, 43.83, 40.73 (d,  $J = 68.1$  Hz), 37.11, 21.00, 17.93 (d,  $J = 5.3$  Hz), 16.93, 14.62, 13.56.  **$^{31}\text{P}$  NMR (162 MHz,  $\text{CDCl}_3$ )**  $\delta$  36.57. **HRMS (ESI)** Calcd. for  $\text{C}_{22}\text{H}_{30}\text{O}_2\text{P}$   $[\text{M}+\text{H}]^+$ : 357.1978, found 357.1960.

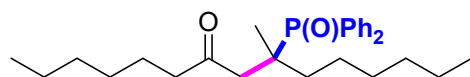

**3pa**

Purification was performed by column chromatography (petroleum ether/ethyl acetate = 1/1) to afford 18.0 mg (82%) of **3aa**. White solid.  $^1\text{H NMR}$  (400 MHz,  $\text{CDCl}_3$ )  $\delta$  8.05 – 7.90 (m, 4H), 7.59 – 7.37 (m, 6H), 3.05 (dd,  $J = 16.2, 9.3$  Hz, 1H), 2.50 (dd,  $J = 16.2, 10.7$  Hz, 1H), 2.45 – 2.24 (m, 2H), 1.85 – 1.71 (m, 2H), 1.52 – 1.02 (m, 21H), 0.86 (t,  $J = 7.0$  Hz, 3H), 0.81 (t,  $J = 7.0$  Hz, 3H).  $^{13}\text{C NMR}$  (101 MHz,  $\text{CDCl}_3$ )  $\delta$  209.36 (d,  $J = 12.3$  Hz), 132.22, 132.14, 131.62 (d,  $J = 43.6$  Hz), 131.60 (d,  $J = 2.6$  Hz), 131.51 (d,  $J = 2.7$  Hz), 130.73 (d,  $J = 44.2$  Hz), 128.38, 128.27, 44.96, 43.74, 40.60 (d,  $J = 68.0$  Hz), 34.84, 31.54, 31.40, 29.79, 28.69, 24.43 (d,  $J = 5.0$  Hz), 23.47, 22.44 (d,  $J = 2.8$  Hz), 21.07, 13.98, 13.97.  $^{31}\text{P NMR}$  (162 MHz,  $\text{CDCl}_3$ )  $\delta$  36.64. **HRMS (ESI)** Calcd. for  $\text{C}_{28}\text{H}_{42}\text{O}_2\text{P}$   $[\text{M}+\text{H}]^+$ : 441.2917, found 441.2904.

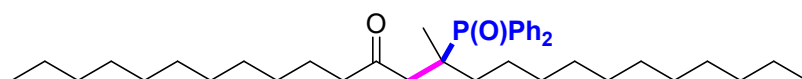

**3qa**

Purification was performed by column chromatography (petroleum ether/ethyl acetate = 1/1) to afford 21.7 mg (75%) of **3aa**. White solid.  $^1\text{H NMR}$  (400 MHz,  $\text{CDCl}_3$ )  $\delta$  8.12 – 7.85 (m, 4H), 7.68 – 7.34 (m, 6H), 3.04 (dd,  $J = 16.2, 9.3$  Hz, 1H), 2.50 (dd,  $J = 16.2, 10.6$  Hz, 1H), 2.41 – 2.23 (m, 2H), 1.86 – 1.70 (m, 2H), 1.46 – 1.34 (m, 6H), 1.30 – 1.10 (m, 33H), 0.88 (t,  $J = 6.8$  Hz, 6H).  $^{13}\text{C NMR}$  (101 MHz,  $\text{CDCl}_3$ )  $\delta$  209.36 (d,  $J = 12.3$  Hz), 132.24, 132.16, 131.73 (d,  $J = 42.4$  Hz), 131.59 (d,  $J = 2.7$  Hz), 131.51 (d,  $J = 2.2$  Hz), 130.84 (d,  $J = 43.4$  Hz), 128.38, 128.27, 44.99, 43.81, 40.64 (d,  $J = 68.0$  Hz), 34.90, 31.89, 31.88, 30.16, 29.58, 29.48, 29.44, 29.39, 29.31 (d,  $J = 1.4$  Hz), 29.24, 29.06, 24.50 (d,  $J = 4.9$  Hz), 23.55, 22.65, 21.08, 14.09.  $^{31}\text{P NMR}$  (162 MHz,  $\text{CDCl}_3$ )  $\delta$  36.56. **HRMS (ESI)** Calcd. for  $\text{C}_{38}\text{H}_{62}\text{O}_2\text{P}$   $[\text{M}+\text{H}]^+$ : 581.4482, found 581.4482.

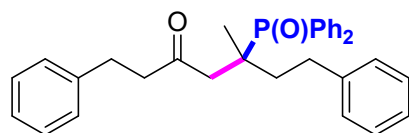

**3ra**

Purification was performed by column chromatography (petroleum ether/ethyl acetate = 1/1) to afford 20.8 mg (87%) of **3aa**. White solid.  $^1\text{H NMR}$  (400 MHz,  $\text{CDCl}_3$ )  $\delta$  8.09 – 7.90 (m, 4H), 7.60 – 7.43 (m, 6H), 7.30 – 7.07 (m, 8H), 6.95 (d,  $J = 7.1$  Hz,

2H), 3.17 (dd,  $J = 16.6, 8.5$  Hz, 1H), 2.84 – 2.67 (m, 5H), 2.61 – 2.43 (m, 2H), 2.20 – 1.96 (m, 3H), 1.43 (d,  $J = 16.6$  Hz, 3H).  $^{13}\text{C}$  NMR (101 MHz,  $\text{CDCl}_3$ )  $\delta$  207.92, 207.80, 142.14, 140.76, 132.22, 132.17, 132.14, 132.09, 131.82 (d,  $J = 2.7$  Hz), 131.67 (d,  $J = 2.7$  Hz), 131.38 (d,  $J = 44.4$  Hz), 130.49 (d,  $J = 44.9$  Hz), 128.56, 128.50, 128.45, 128.41, 128.39, 128.29, 128.26, 128.24, 126.05, 125.68, 46.30, 46.29, 43.76, 40.64 (d,  $J = 67.8$  Hz), 37.12, 31.24 (d,  $J = 4.3$  Hz), 29.55, 21.44.  $^{31}\text{P}$  NMR (162 MHz,  $\text{CDCl}_3$ )  $\delta$  36.31. HRMS (ESI) Calcd. for  $\text{C}_{32}\text{H}_{34}\text{O}_2\text{P}$   $[\text{M}+\text{H}]^+$ : 481.2291, found 481.2285.

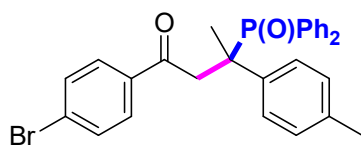

**3sa**

Purification was performed by column chromatography (petroleum ether/ethyl acetate = 1/1) to afford 30.9 mg (60%) of **3aa**. White solid.  $^1\text{H}$  NMR (400 MHz,  $\text{CDCl}_3$ )  $\delta$  7.72 – 7.35 (m, 15H), 6.99 (d,  $J = 8.1$  Hz, 2H), 6.91 – 6.86 (m, 2H), 3.99 (dd,  $J = 17.7, 7.9$  Hz, 1H), 3.77 (dd,  $J = 17.7, 5.1$  Hz, 1H), 2.32 (s, 3H), 1.86 (d,  $J = 16.3$  Hz, 3H).  $^{13}\text{C}$  NMR (101 MHz,  $\text{CDCl}_3$ )  $\delta$  195.49 (d,  $J = 16.1$  Hz), 136.60 (d,  $J = 3.4$  Hz), 136.29 (d,  $J = 2.4$  Hz), 135.20 (d,  $J = 3.5$  Hz), 133.05 (d,  $J = 7.6$  Hz), 132.89 (d,  $J = 7.9$  Hz), 131.85 (d,  $J = 2.8$  Hz), 131.79 (d,  $J = 4.0$  Hz), 131.77, 129.96 (d,  $J = 53.8$  Hz), 129.42, 129.04 (d,  $J = 53.0$  Hz), 128.53 (d,  $J = 2.8$  Hz), 128.20 (d,  $J = 4.9$  Hz), 127.97, 127.97 (d,  $J = 22.1$  Hz), 44.51 (d,  $J = 64.0$  Hz), 42.01, 21.03, 19.73.  $^{31}\text{P}$  NMR (162 MHz,  $\text{CDCl}_3$ )  $\delta$  35.21. HRMS (ESI) Calcd. for  $\text{C}_{29}\text{H}_{27}\text{BrO}_2\text{P}$   $[\text{M}+\text{H}]^+$ : 517.0927, found 517.0922.

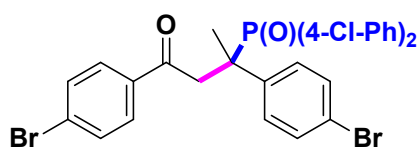

**3ab**

Purification was performed by column chromatography (petroleum ether/ethyl acetate = 1/1) to afford 26.2 mg (81%) of **3aa**. White solid.  $^1\text{H}$  NMR (400 MHz,  $\text{CDCl}_3$ )  $\delta$  7.68 (d,  $J = 8.6$  Hz, 2H), 7.64 – 7.52 (m, 4H), 7.51 – 7.43 (m, 4H), 7.42 – 7.32 (m, 4H), 6.93 (dd,  $J = 8.7, 2.2$  Hz, 2H), 3.97 (dd,  $J = 17.9, 8.2$  Hz, 1H), 3.68 (dd,  $J = 17.9, 5.0$  Hz, 1H), 1.84 (d,  $J = 16.5$  Hz, 3H).  $^{13}\text{C}$  NMR (101 MHz,  $\text{CDCl}_3$ )  $\delta$  194.66 (d,  $J = 15.9$  Hz), 139.20 (s), 139.07 (s), 137.34 (d,  $J = 3.6$  Hz), 135.79 (d,  $J = 2.3$  Hz), 134.18 (d,  $J = 8.4$  Hz), 133.96 (d,  $J = 8.7$  Hz), 131.94, 131.11 (d,  $J = 2.8$  Hz), 129.88 (d,  $J = 4.8$  Hz), 129.32, 128.79 (d,  $J = 11.6$  Hz), 128.62, 128.60 (d,  $J = 11.8$  Hz), 127.66 (d,  $J$

= 35.2 Hz), 126.72 (d,  $J = 34.0$  Hz), 121.55 (d,  $J = 4.3$  Hz), 121.55 (d,  $J = 4.3$  Hz), 44.67 (d,  $J = 64.4$  Hz), 41.88, 19.71.  $^{31}\text{P}$  NMR (162 MHz,  $\text{CDCl}_3$ )  $\delta$  34.03. HRMS (ESI) Calcd. for  $\text{C}_{28}\text{H}_{22}\text{Br}_2\text{Cl}_2\text{O}_2\text{P}$   $[\text{M}+\text{H}]^+$ : 648.9096, found 648.9094.

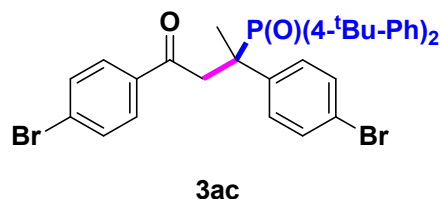

Purification was performed by column chromatography (petroleum ether/ethyl acetate = 1/1) to afford 29.7 mg (86%) of **3aa**. White solid.  $^1\text{H}$  NMR (400 MHz,  $\text{CDCl}_3$ )  $\delta$  7.72 (d,  $J = 8.5$  Hz, 2H), 7.65 – 7.33 (m, 10H), 7.30 (d,  $J = 8.4$  Hz, 2H), 6.94 (d,  $J = 6.6$  Hz, 2H), 4.04 (dd,  $J = 17.9, 7.4$  Hz, 1H), 3.75 (d,  $J = 16.6$  Hz, 1H), 1.84 (d,  $J = 16.1$  Hz, 3H), 1.30 (d,  $J = 13.9$  Hz, 18H).  $^{13}\text{C}$  NMR (101 MHz,  $\text{CDCl}_3$ )  $\delta$  195.34 (d,  $J = 15.8$  Hz), 155.44 (d,  $J = 2.6$  Hz), 138.19, 136.03 (d,  $J = 2.2$  Hz), 132.78 (d,  $J = 8.1$  Hz), 132.58 (d,  $J = 8.3$  Hz), 131.82, 130.70 (d,  $J = 2.6$  Hz), 130.07 (d,  $J = 4.7$  Hz), 129.43, 128.35, 125.19 (d,  $J = 11.4$  Hz), 125.05 (d,  $J = 11.5$  Hz), 120.97 (d,  $J = 4.0$  Hz), 44.57 (d,  $J = 63.5$  Hz), 42.19, 34.95, 34.91, 31.06, 31.01.  $^{31}\text{P}$  NMR (162 MHz,  $\text{CDCl}_3$ )  $\delta$  35.18. HRMS (ESI) Calcd. for  $\text{C}_{36}\text{H}_{40}\text{Br}_2\text{O}_2\text{P}$   $[\text{M}+\text{H}]^+$ : 693.1127, found 693.1125.

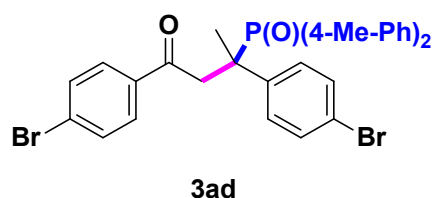

Purification was performed by column chromatography (petroleum ether/ethyl acetate = 1/1) to afford 27.3 mg (90%) of **3aa**. White solid.  $^1\text{H}$  NMR (400 MHz,  $\text{CDCl}_3$ )  $\delta$  7.69 (d,  $J = 8.6$  Hz, 2H), 7.62 – 7.51 (m, 4H), 7.45 (dd,  $J = 10.0, 8.2$  Hz, 2H), 7.35 – 7.22 (m, 4H), 7.18 (dd,  $J = 8.0, 2.4$  Hz, 2H), 6.92 (dd,  $J = 8.7, 2.2$  Hz, 2H), 4.02 (dd,  $J = 18.0, 7.8$  Hz, 1H), 3.70 (dd,  $J = 18.0, 4.9$  Hz, 1H), 2.40 (s, 3H), 2.36 (s, 3H), 1.83 (d,  $J = 16.0$  Hz, 3H).  $^{13}\text{C}$  NMR (101 MHz,  $\text{CDCl}_3$ )  $\delta$  195.28 (d,  $J = 15.7$  Hz), 142.55 (d,  $J = 2.8$  Hz), 142.48 (d,  $J = 2.7$  Hz), 138.16 (d,  $J = 3.4$  Hz), 136.04 (d,  $J = 2.1$  Hz), 132.91 (d,  $J = 7.9$  Hz), 132.69 (d,  $J = 8.2$  Hz), 131.83, 130.74 (d,  $J = 2.6$  Hz), 130.04 (d,  $J = 4.6$  Hz), 129.36, 128.97 (d,  $J = 11.5$  Hz), 128.83 (d,  $J = 11.6$  Hz), 128.35, 126.36 (d,  $J = 39.7$  Hz), 125.41 (d,  $J = 38.8$  Hz), 121.00 (d,  $J = 4.0$  Hz), 44.56 (d,  $J = 63.5$  Hz), 42.20, 21.51, 19.70.  $^{31}\text{P}$  NMR (162 MHz,  $\text{CDCl}_3$ )  $\delta$  35.14. HRMS (ESI) Calcd. for  $\text{C}_{30}\text{H}_{28}\text{Br}_2\text{O}_2\text{P}$   $[\text{M}+\text{H}]^+$ : 609.0188, found 609.0180.



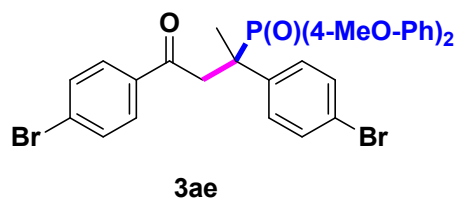

Purification was performed by column chromatography (petroleum ether/ethyl acetate = 1/1) to afford 28.8 mg (90%) of **3aa**. White solid.  $^1\text{H NMR}$  (400 MHz,  $\text{CDCl}_3$ )  $\delta$  7.70 (d,  $J = 8.5$  Hz, 2H), 7.64 – 7.52 (m, 4H), 7.47 (t,  $J = 9.2$  Hz, 2H), 7.32 (d,  $J = 8.5$  Hz, 2H), 7.02 – 6.82 (m, 6H), 3.99 (dd,  $J = 18.0, 7.7$  Hz, 1H), 3.84 (d,  $J = 11.9$  Hz, 6H), 3.70 (dd,  $J = 18.0, 4.9$  Hz, 1H), 1.82 (d,  $J = 16.0$  Hz, 3H).  $^{13}\text{C NMR}$  (101 MHz,  $\text{CDCl}_3$ )  $\delta$  195.33 (d,  $J = 15.7$  Hz), 162.46 (d,  $J = 2.9$  Hz), 162.36 (d,  $J = 2.9$  Hz), 138.26 (d,  $J = 3.4$  Hz), 136.01 (d,  $J = 2.2$  Hz), 134.67 (d,  $J = 8.8$  Hz), 134.46 (d,  $J = 9.2$  Hz), 131.83, 130.74 (d,  $J = 2.7$  Hz), 130.02 (d,  $J = 4.6$  Hz), 129.36, 128.35, 120.98 (d,  $J = 3.9$  Hz), 120.96, 120.19 (d,  $J = 44.8$  Hz), 119.43, 113.69 (d,  $J = 27.6$  Hz), 113.69 (d,  $J = 3.4$  Hz), 55.30 (d,  $J = 2.3$  Hz), 44.68 (d,  $J = 64.4$  Hz), 42.13, 19.66.  $^{31}\text{P NMR}$  (162 MHz,  $\text{CDCl}_3$ )  $\delta$  35.14. HRMS (ESI) Calcd. for  $\text{C}_{30}\text{H}_{28}\text{Br}_2\text{O}_4\text{P}$   $[\text{M}+\text{H}]^+$ : 641.0086, found 641.0076.

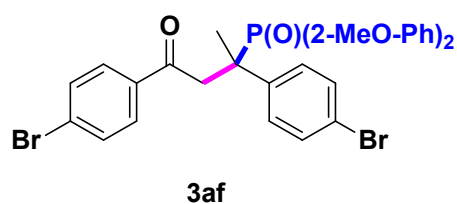

Purification was performed by column chromatography (petroleum ether/ethyl acetate = 1/1) to afford 17.0 mg (53%) of **3aa**. White solid.  $^1\text{H NMR}$  (400 MHz,  $\text{CDCl}_3$ )  $\delta$  7.94 – 7.83 (m,  $J = 12.3, 7.7, 1.7$  Hz, 1H), 7.78 (d,  $J = 8.6$  Hz, 2H), 7.55 – 7.50 (m, 2H), 7.47 (t,  $J = 7.8$  Hz, 1H), 7.33 (t,  $J = 7.5$  Hz, 1H), 7.22 – 7.12 (m, 3H), 7.05 – 6.94 (m, 4H), 6.91 – 6.84 (m,  $J = 7.5, 1.4$  Hz, 1H), 6.56 – 6.50 (m,  $J = 8.2, 5.4$  Hz, 1H), 4.61 (dd,  $J = 18.1, 8.1$  Hz, 1H), 4.08 (dd,  $J = 18.0, 4.7$  Hz, 1H), 3.95 (s, 3H), 3.57 (s, 3H), 1.86 (d,  $J = 19.8$  Hz, 3H).  $^{13}\text{C NMR}$  (101 MHz,  $\text{CDCl}_3$ )  $\delta$  197.09 (d,  $J = 16.1$  Hz), 160.79 (d,  $J = 2.8$  Hz), 158.46 (d,  $J = 3.2$  Hz), 141.15 (d,  $J = 2.9$  Hz), 136.67 (d,  $J = 2.6$  Hz), 135.48 (d,  $J = 4.9$  Hz), 134.87 (d,  $J = 8.9$  Hz), 133.66 (d,  $J = 2.2$  Hz), 133.50 (d,  $J = 1.8$  Hz), 131.67, 129.64 (d,  $J = 2.4$  Hz), 129.45, 128.92 (d,  $J = 5.8$  Hz), 127.92, 121.00 (d,  $J = 5.5$  Hz), 120.71 (d,  $J = 11.9$  Hz), 119.99 (d,  $J = 13.0$  Hz), 119.88 (d,  $J = 1.7$  Hz), 111.55 (d,  $J = 6.7$  Hz), 109.45 (d,  $J = 6.8$  Hz), 55.76, 54.15, 46.07, 45.44 (d,  $J = 67.2$  Hz), 18.08.  $^{31}\text{P NMR}$  (162 MHz,  $\text{CDCl}_3$ )  $\delta$  51.58. HRMS (ESI) Calcd. for  $\text{C}_{30}\text{H}_{28}\text{Br}_2\text{O}_4\text{P}$   $[\text{M}+\text{H}]^+$ : 641.0086, found 641.0076.

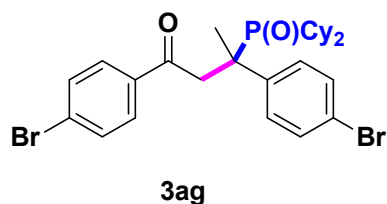

Purification was performed by column chromatography (petroleum ether/ethyl acetate = 1/1) to afford 13.0 mg (44%) of **3aa**. White solid.  $^1\text{H NMR}$  (400 MHz,  $\text{CDCl}_3$ )  $\delta$  7.68 (d,  $J = 8.5$  Hz, 2H), 7.52 (d,  $J = 8.5$  Hz, 2H), 7.48 – 7.35 (m, 4H), 4.54 (dd,  $J = 17.5, 8.1$  Hz, 1H), 3.26 (dd,  $J = 17.6, 3.2$  Hz, 1H), 2.26 – 1.95 (m, 3H), 1.88 (d,  $J = 15.3$  Hz, 6H), 1.78 – 1.16 (m, 15H), 1.05 – 0.76 (m, 4H).  $^{13}\text{C NMR}$  (101 MHz,  $\text{CDCl}_3$ )  $\delta$  196.17 (d,  $J = 12.7$  Hz), 140.42 (d,  $J = 4.4$  Hz), 136.31 (d,  $J = 1.6$  Hz), 131.76, 131.21 (d,  $J = 1.9$  Hz), 129.45, 129.01 (d,  $J = 4.1$  Hz), 128.25, 44.37 (d,  $J = 50.6$  Hz), 44.19, 37.72 (d,  $J = 58.8$  Hz), 36.99 (d,  $J = 54.7$  Hz), 27.67 (d,  $J = 3.1$  Hz), 27.34 (d,  $J = 3.6$  Hz), 27.04 (d,  $J = 1.5$  Hz), 26.95 (d,  $J = 2.1$  Hz), 25.86 (d,  $J = 4.5$  Hz), 19.29.  $^{31}\text{P NMR}$  (162 MHz,  $\text{CDCl}_3$ )  $\delta$  53.24. HRMS (ESI) Calcd. for  $\text{C}_{28}\text{H}_{36}\text{Br}_2\text{O}_2\text{P}$   $[\text{M}+\text{H}]^+$ : 593.0814, found 593.0836.

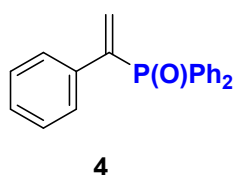

$^1\text{H NMR}$  (400 MHz,  $\text{CDCl}_3$ )  $\delta$  7.72 (dd,  $J = 11.8, 7.2$  Hz, 4H), 7.57 – 7.37 (m, 8H), 7.26 – 7.21 (m, 3H), 6.25 (d,  $J = 40.2$  Hz, 1H), 5.75 (d,  $J = 19.8$  Hz, 1H).  $^{13}\text{C NMR}$  (101 MHz,  $\text{CDCl}_3$ )  $\delta$  144.20 (d,  $J = 92.5$  Hz, 1H), 137.42 (d,  $J = 9.9$  Hz, 1H), 131.94, 131.85, 131.82, 131.49 (d,  $J = 103.6$  Hz, 18H), 128.45, 128.33, 128.12, 128.03 (d,  $J = 4.7$  Hz, 4H).

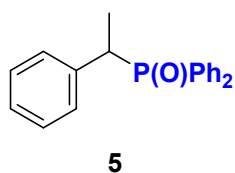

$^1\text{H NMR}$  (400 MHz,  $\text{CDCl}_3$ )  $\delta$  7.96 – 7.84 (m,  $J = 10.5, 7.8, 1.5$  Hz, 2H), 7.58 – 7.43 (m, 5H), 7.41 – 7.32 (m, 1H), 7.32 – 7.23 (m, 2H), 7.14 – 7.07 (m, 2H), 6.99 (d,  $J = 7.8$  Hz, 2H), 3.63 – 3.50 (m,  $J = 7.5$  Hz, 1H), 2.26 (s, 3H), 1.55 (dd,  $J = 16.1, 7.4$  Hz, 3H).  $^{13}\text{C NMR}$  (101 MHz,  $\text{CDCl}_3$ )  $\delta$  136.40 (d,  $J = 2.6$  Hz, 0H), 134.67 (d,  $J = 5.6$  Hz, 0H), 132.50 (d,  $J = 4.3$  Hz, 0H), 131.56 (d,  $J = 2.5$  Hz, 1H), 131.16, 131.30 (d,  $J = 8.4$  Hz, 1H), 131.07, 128.94 (d,  $J = 8.9$  Hz, 2H), 128.92 (d,  $J = 1.0$  Hz, 1H), 128.54 (d,  $J = 11.1$  Hz, 1H), 127.95 (d,  $J = 11.5$  Hz, 1H), 40.36 (d,  $J = 67.6$  Hz, 1H), 20.97,

15.49 (d,  $J = 2.6$  Hz, 1H).

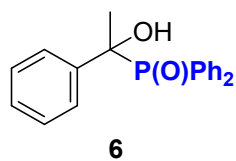

**$^1\text{H}$  NMR (400 MHz, DMSO)**  $\delta$  8.08 (t,  $J = 8.4$  Hz, 2H), 7.78 – 7.63 (m, 2H), 7.63 – 7.28 (m, 8H), 7.16 (dt,  $J = 23.5, 7.2$  Hz, 3H), 6.43 (d,  $J = 18.9$  Hz, 1H), 1.65 (d,  $J = 14.0$  Hz, 3H).  **$^{13}\text{C}$  NMR (101 MHz, DMSO)**  $\delta$  143.49 (d,  $J = 3.2$  Hz), 133.07 (d,  $J = 7.7$  Hz), 132.27 (d,  $J = 7.8$  Hz), 131.97 (d,  $J = 2.6$  Hz), 131.70 (d,  $J = 2.4$  Hz), 128.63 (d,  $J = 10.6$  Hz), 128.22 (d,  $J = 10.9$  Hz), 128.22 (d,  $J = 10.9$  Hz), 127.72 (d,  $J = 2.1$  Hz), 127.17 (d,  $J = 2.3$  Hz), 126.82 (d,  $J = 3.3$  Hz), 75.67 (d,  $J = 89.6$  Hz), 25.95 (d,  $J = 4.0$  Hz), 25.95 (d,  $J = 4.0$  Hz).  **$^{31}\text{P}$  NMR (162 MHz, DMSO)**  $\delta$  30.14.

## $^1\text{H}$ , $^{13}\text{C}$ and $^{31}\text{P}$ NMR Spectra of Products

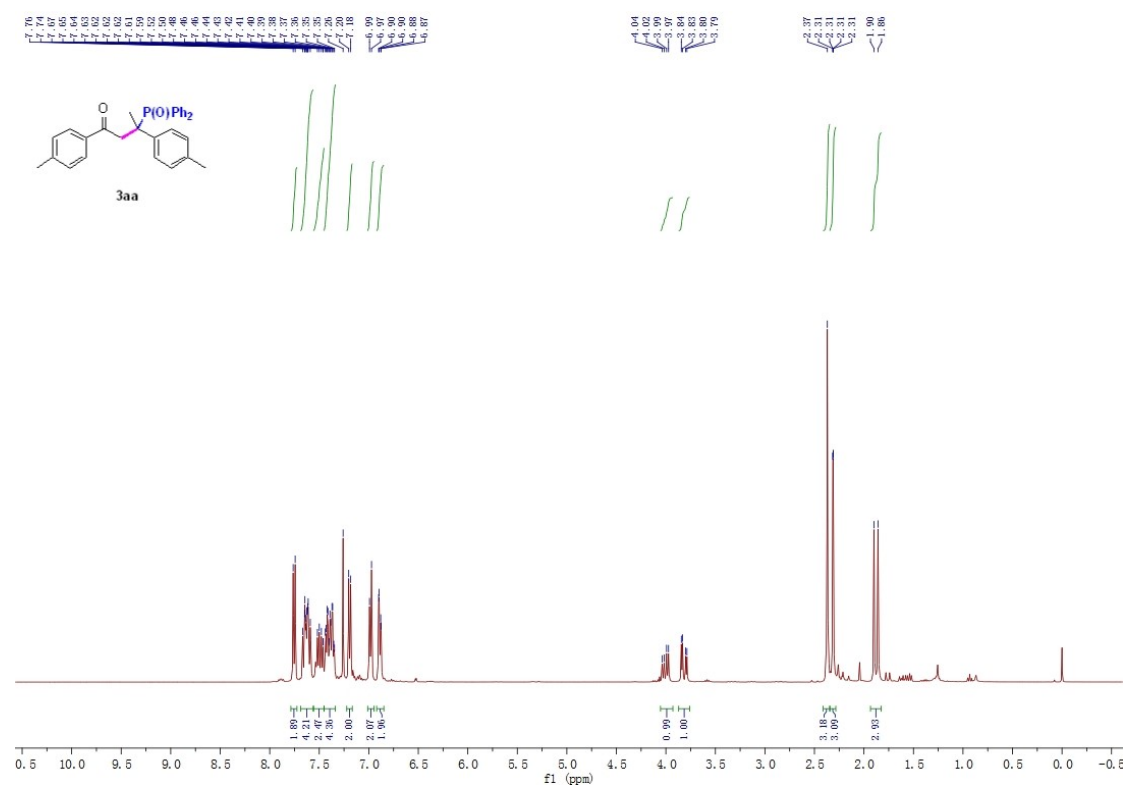

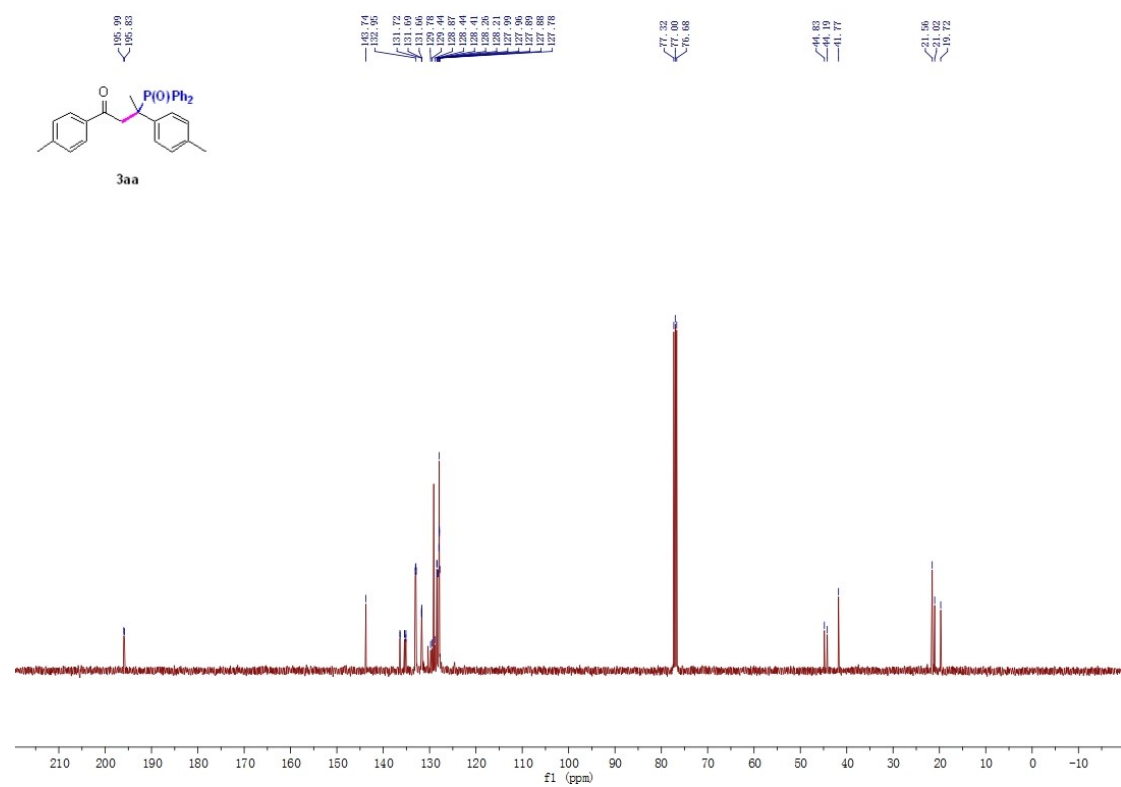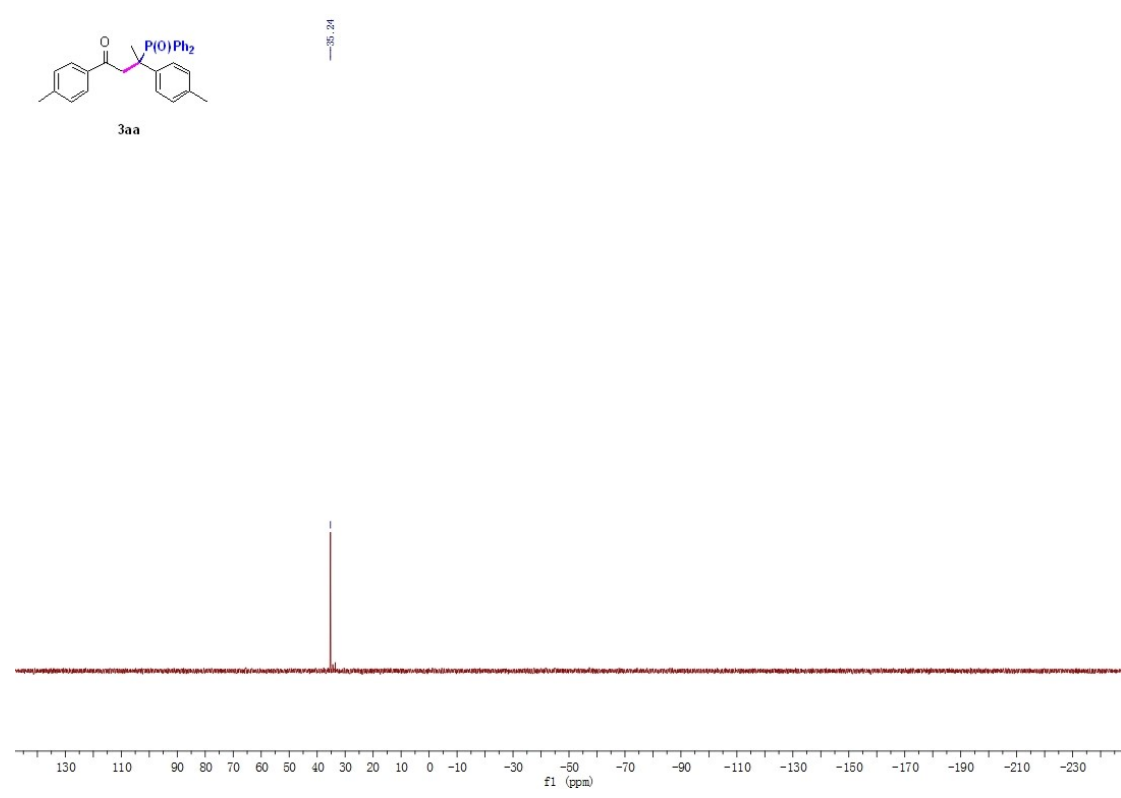

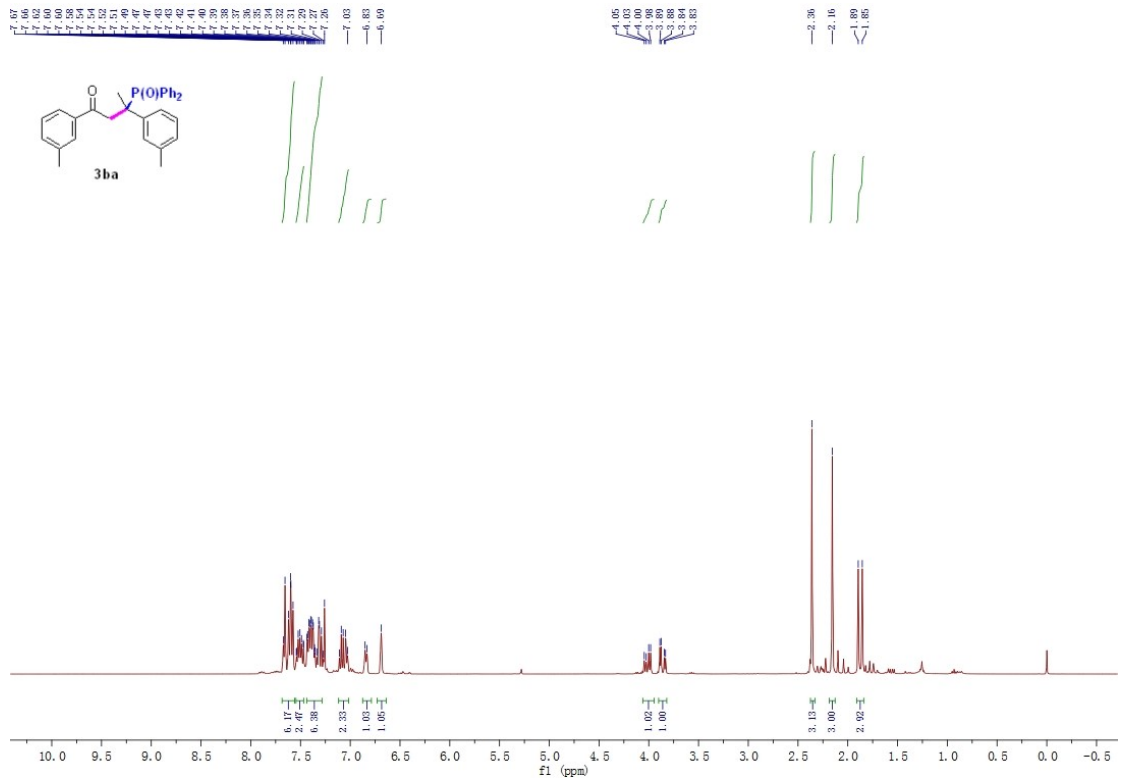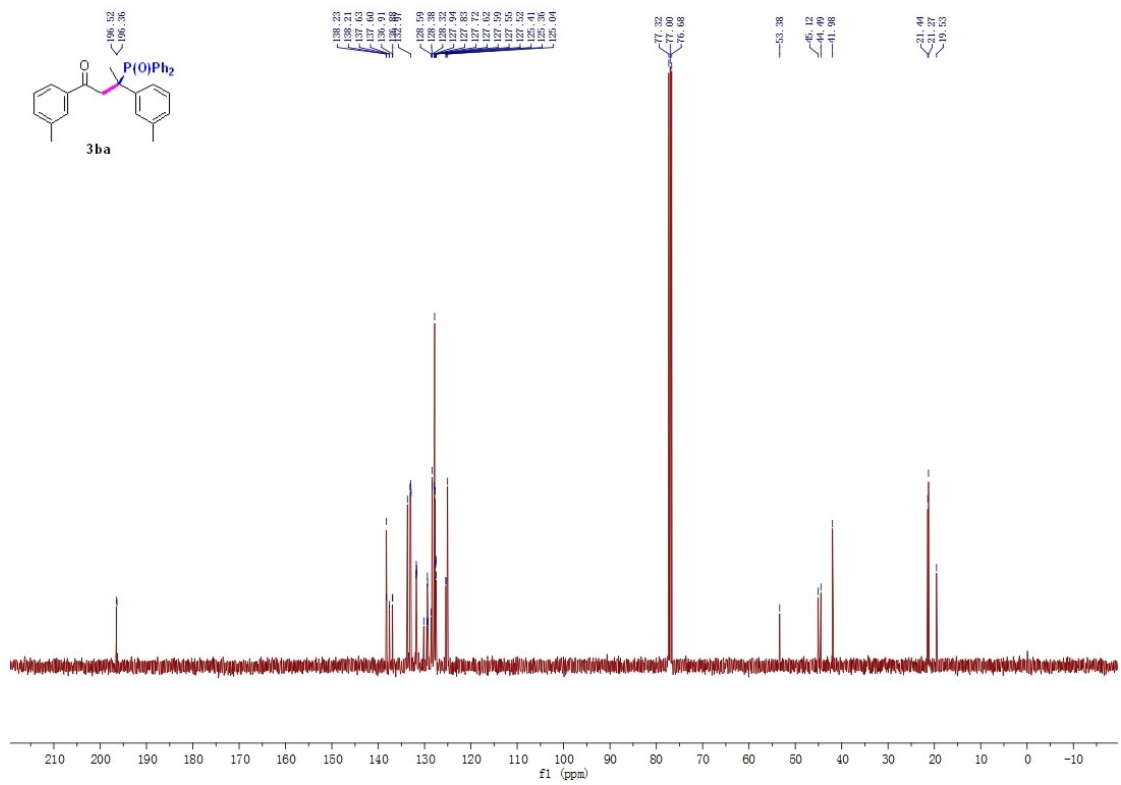

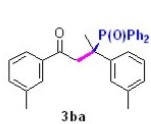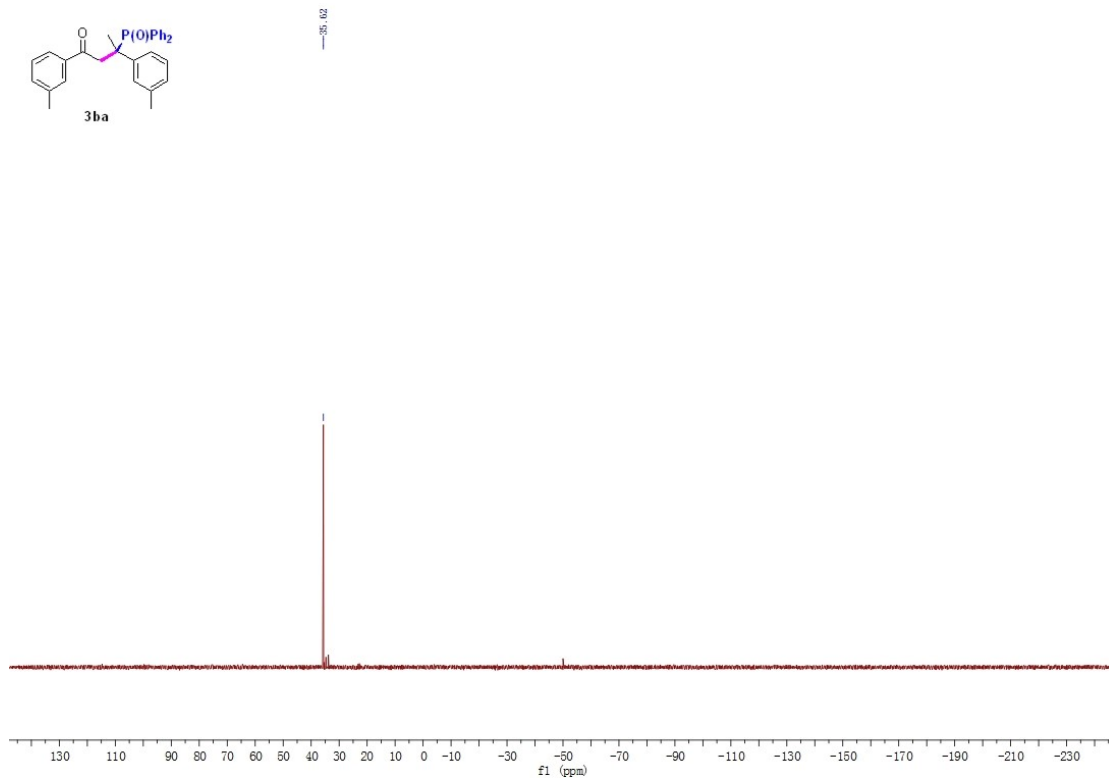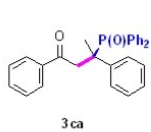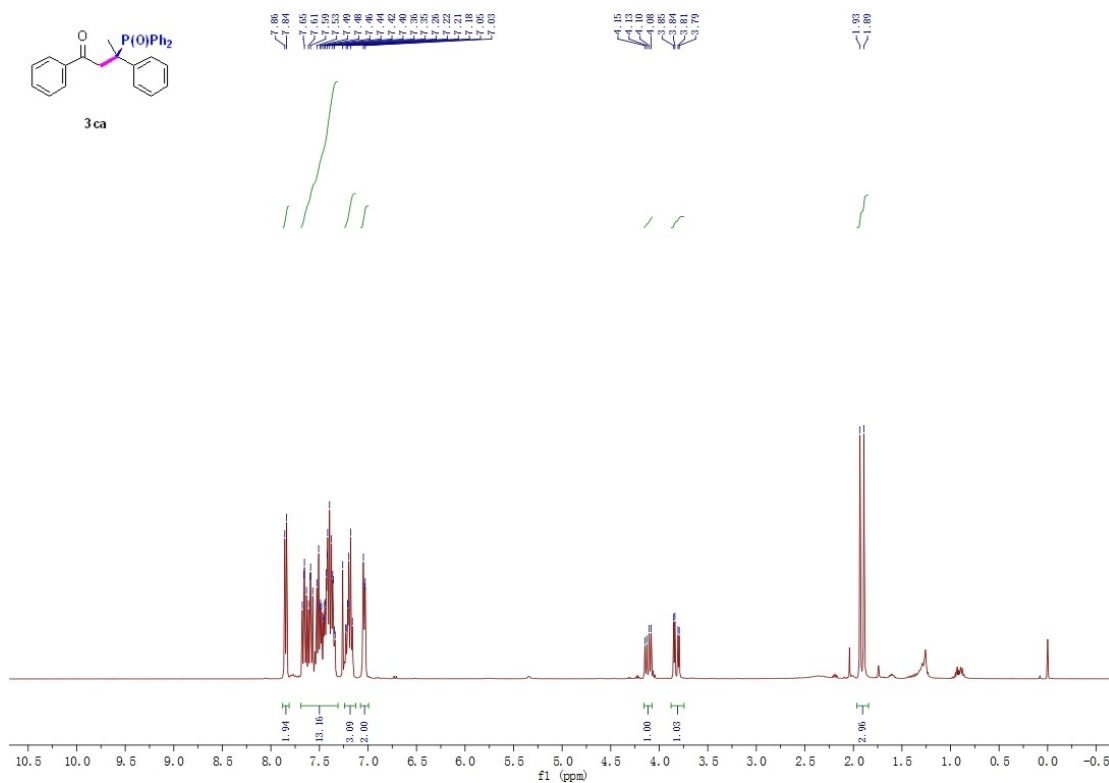

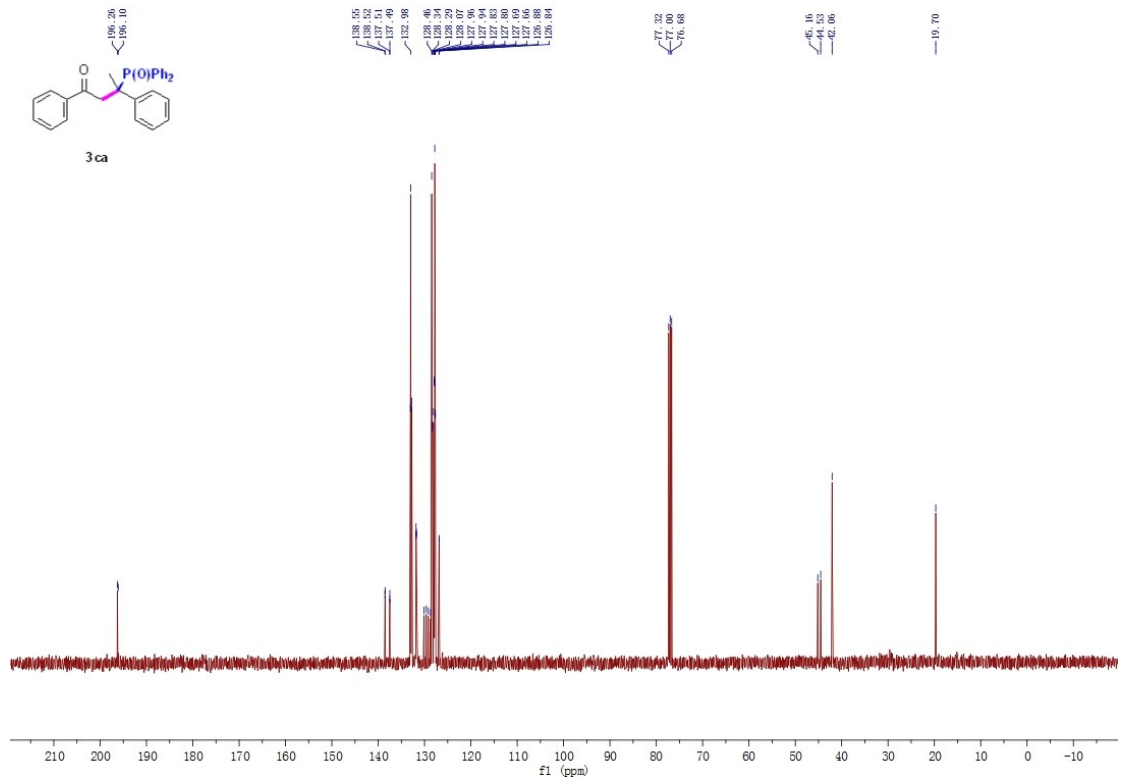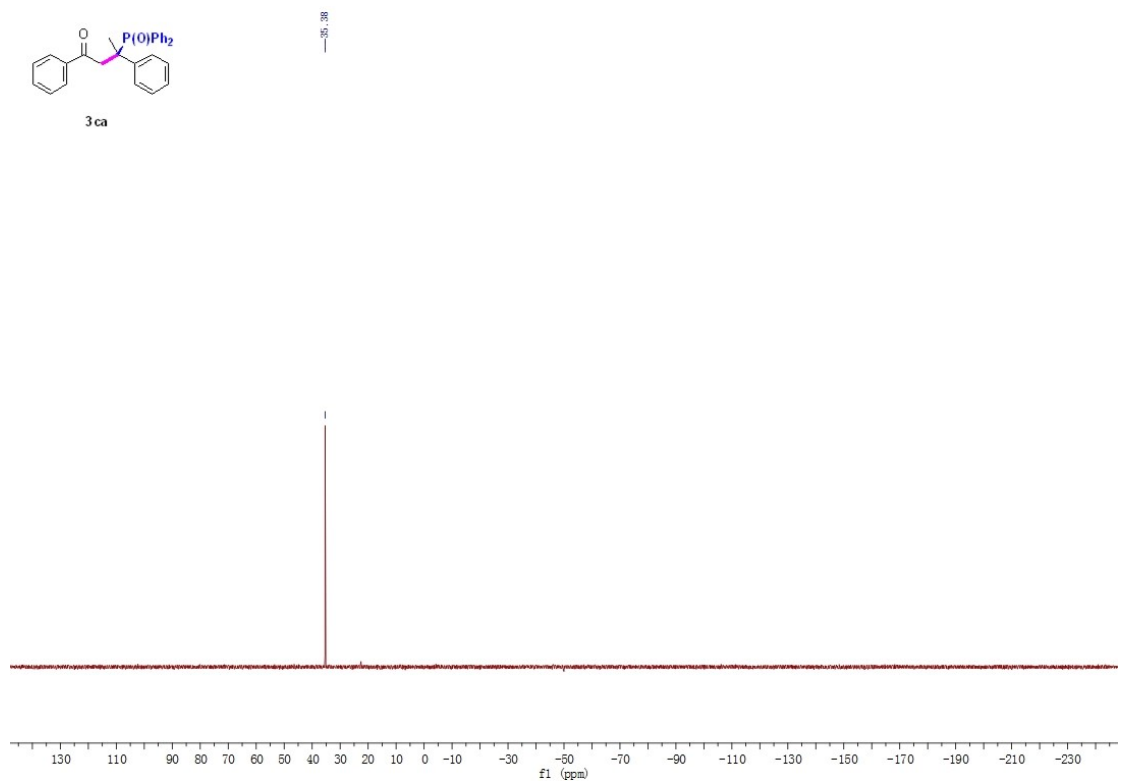

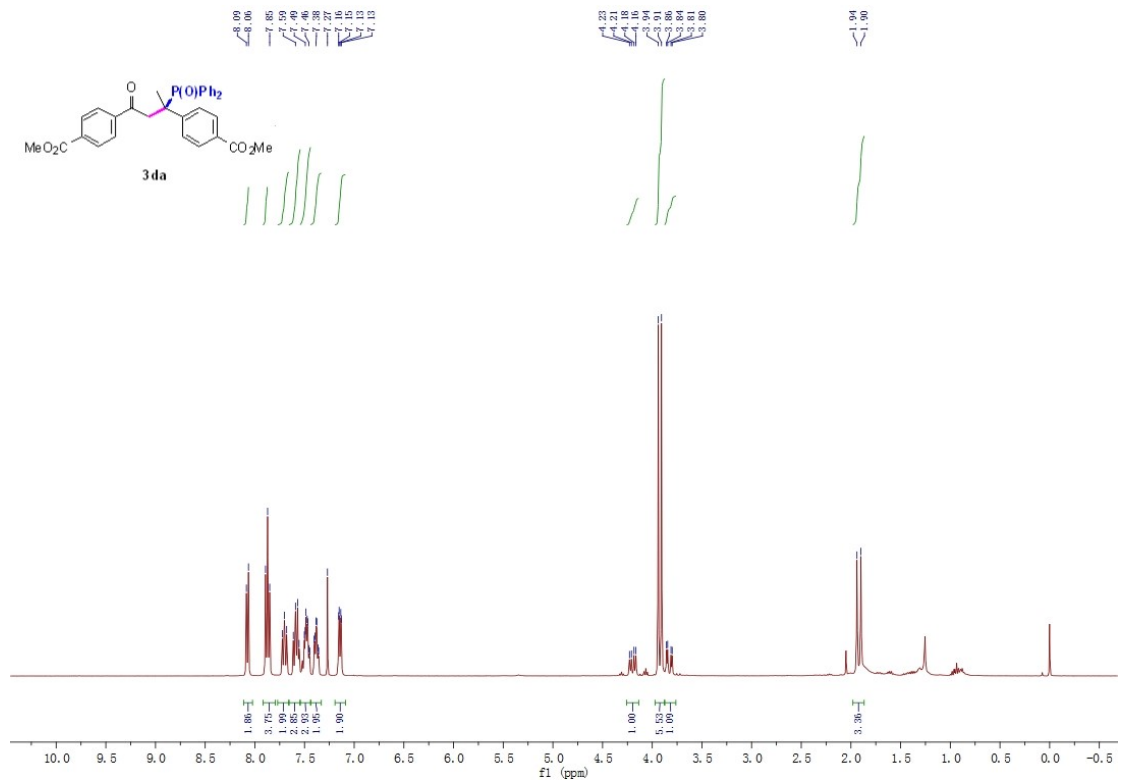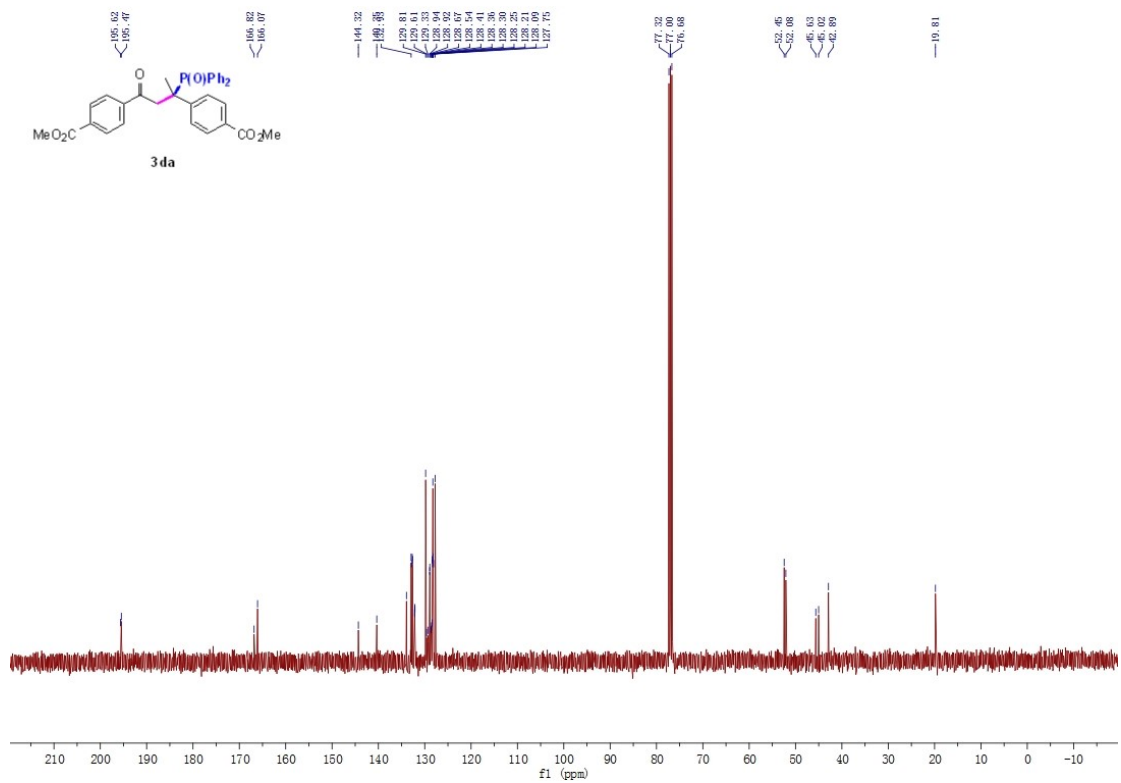



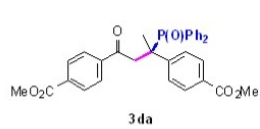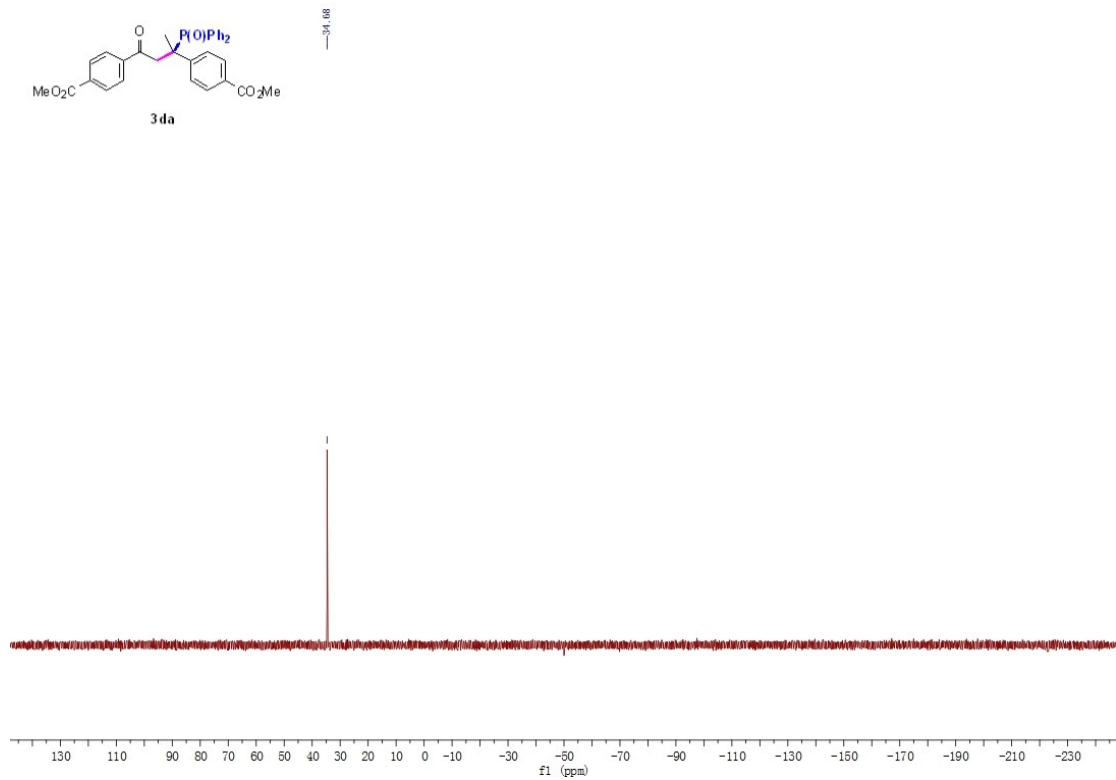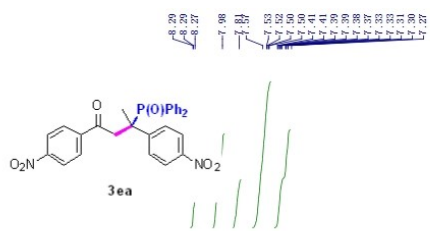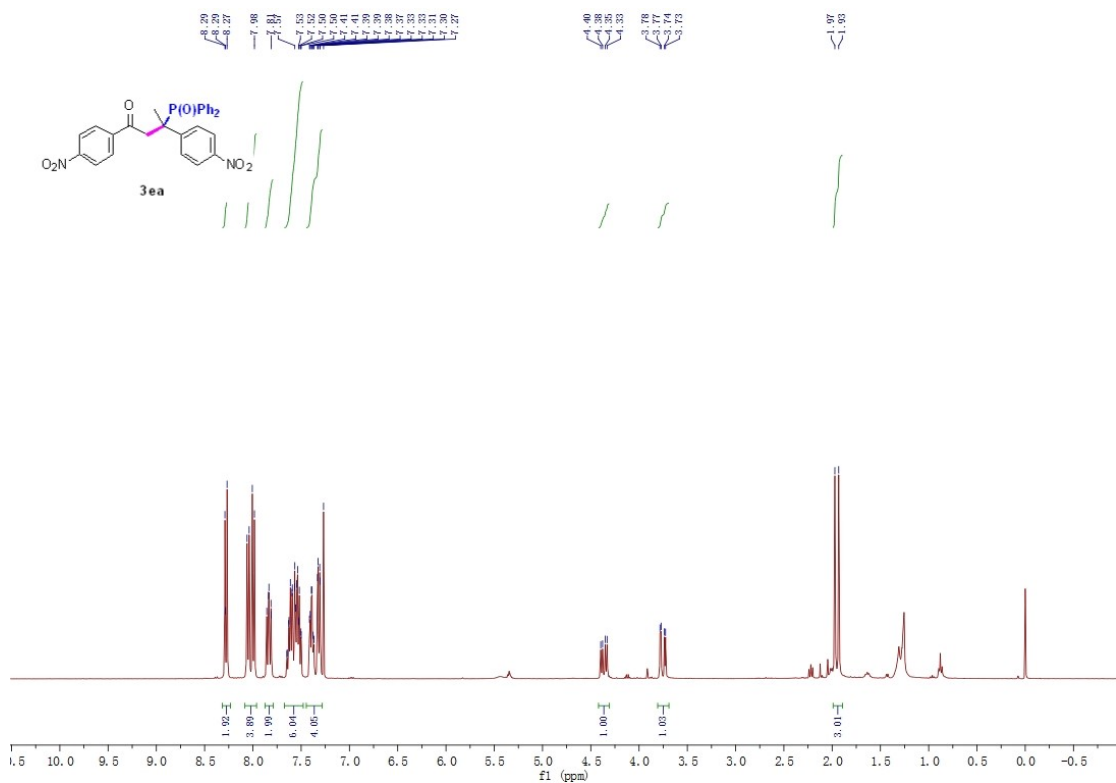

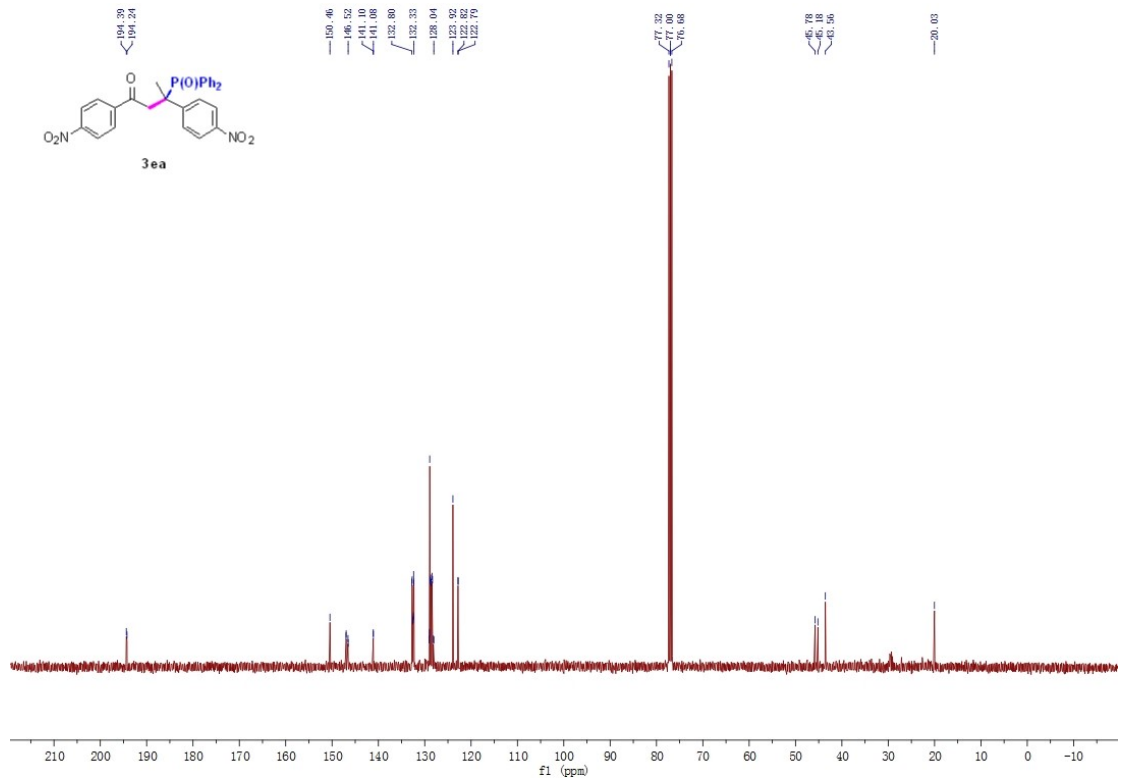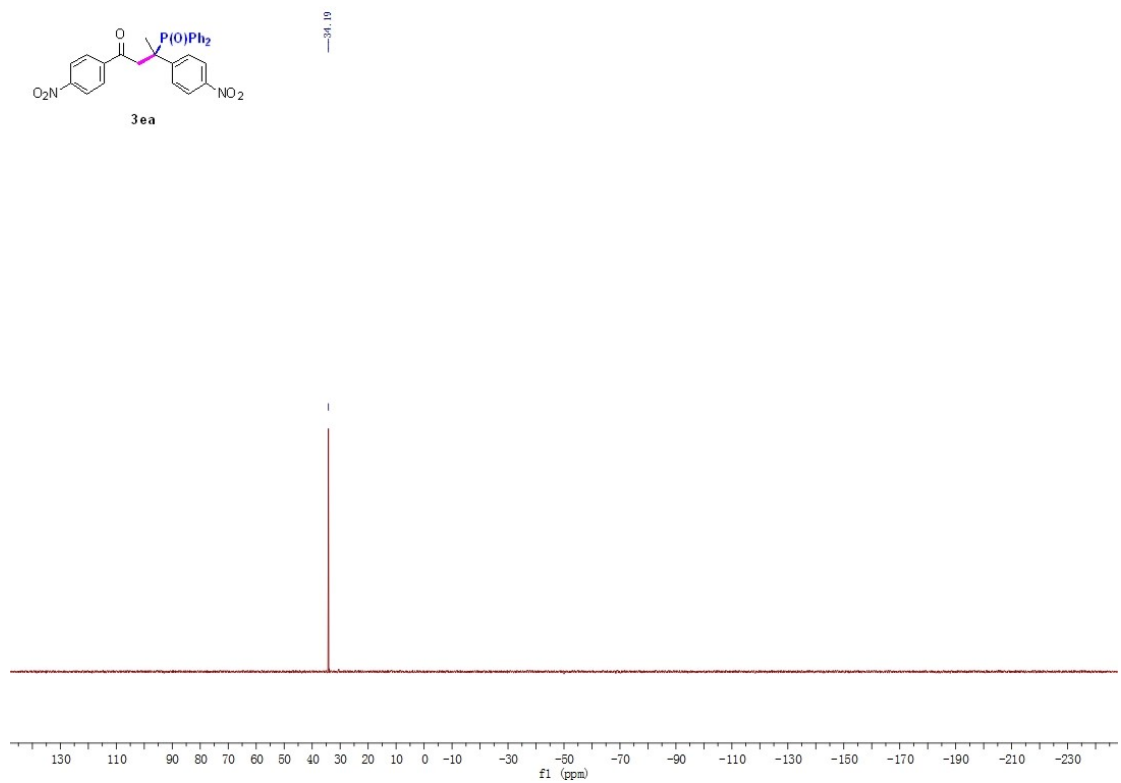

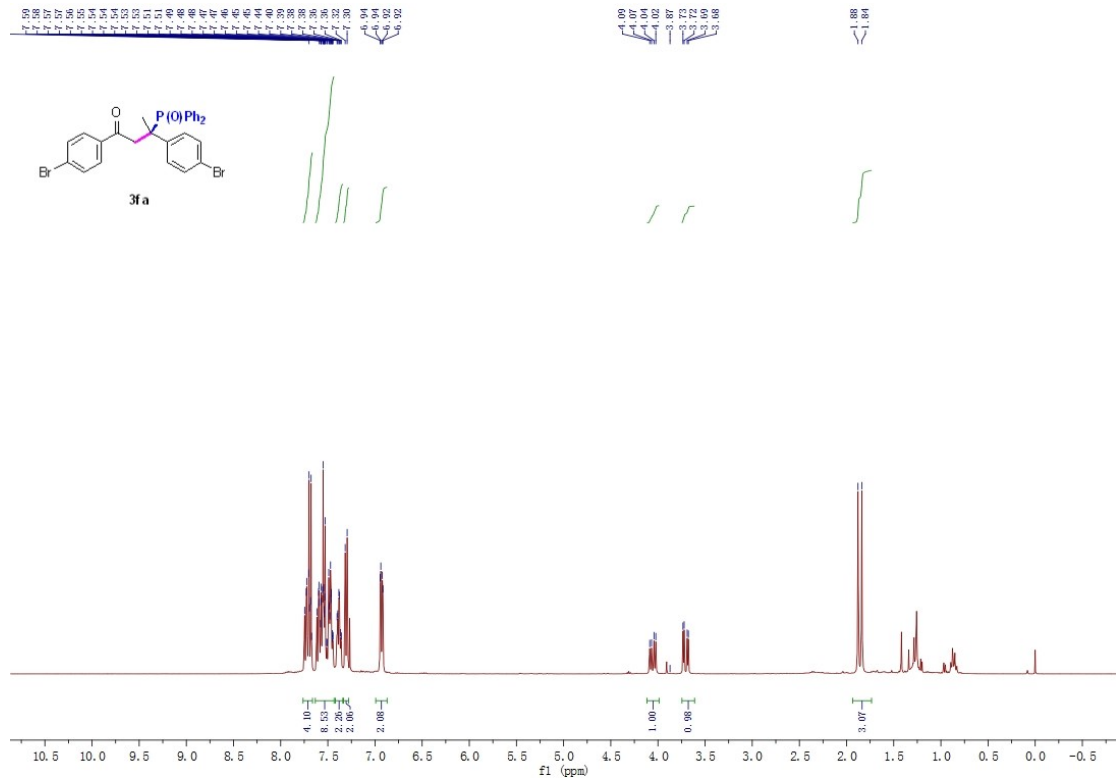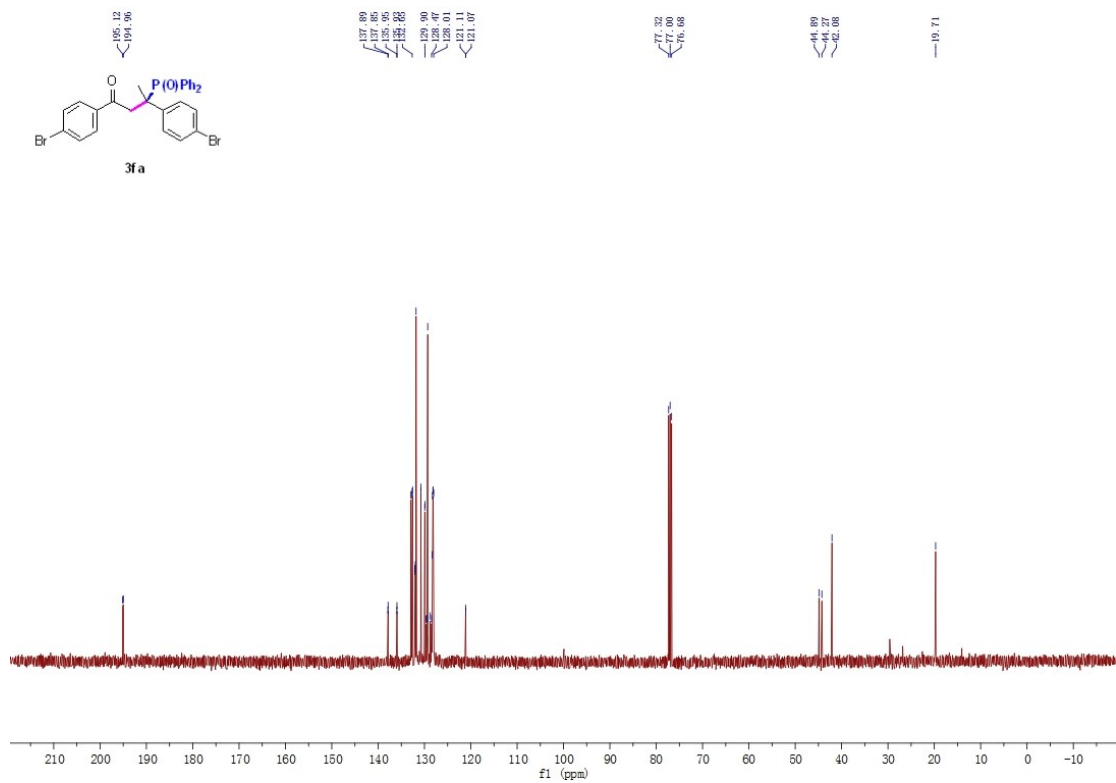



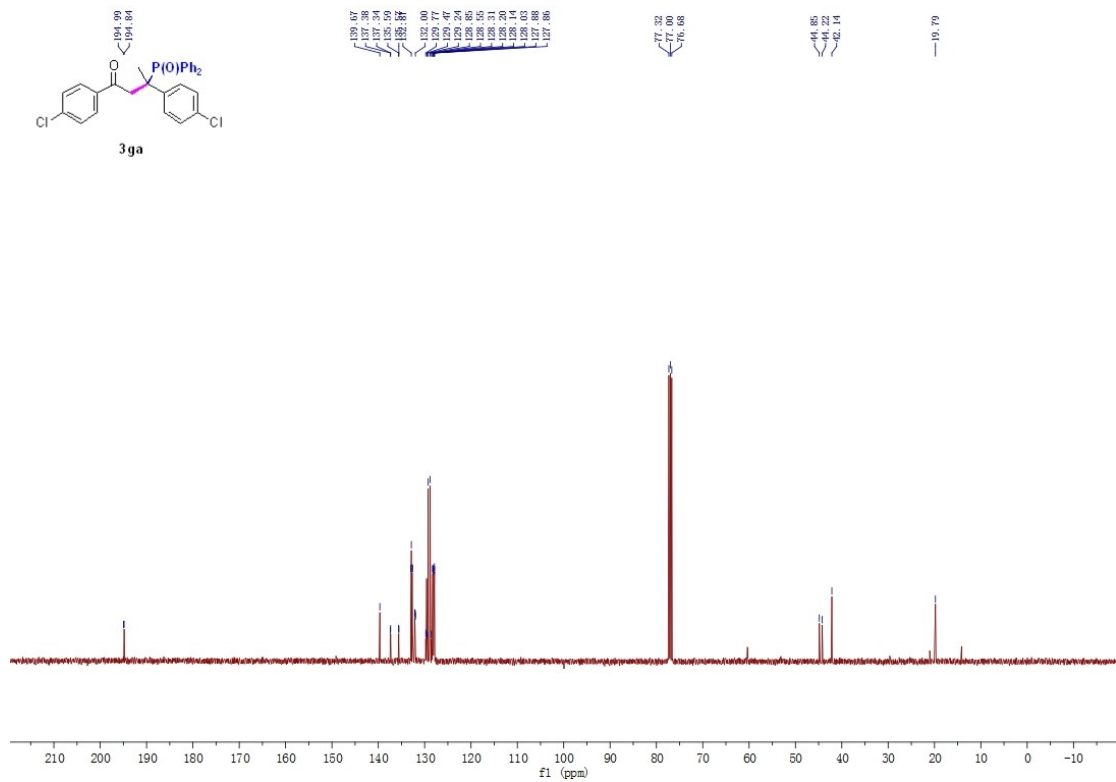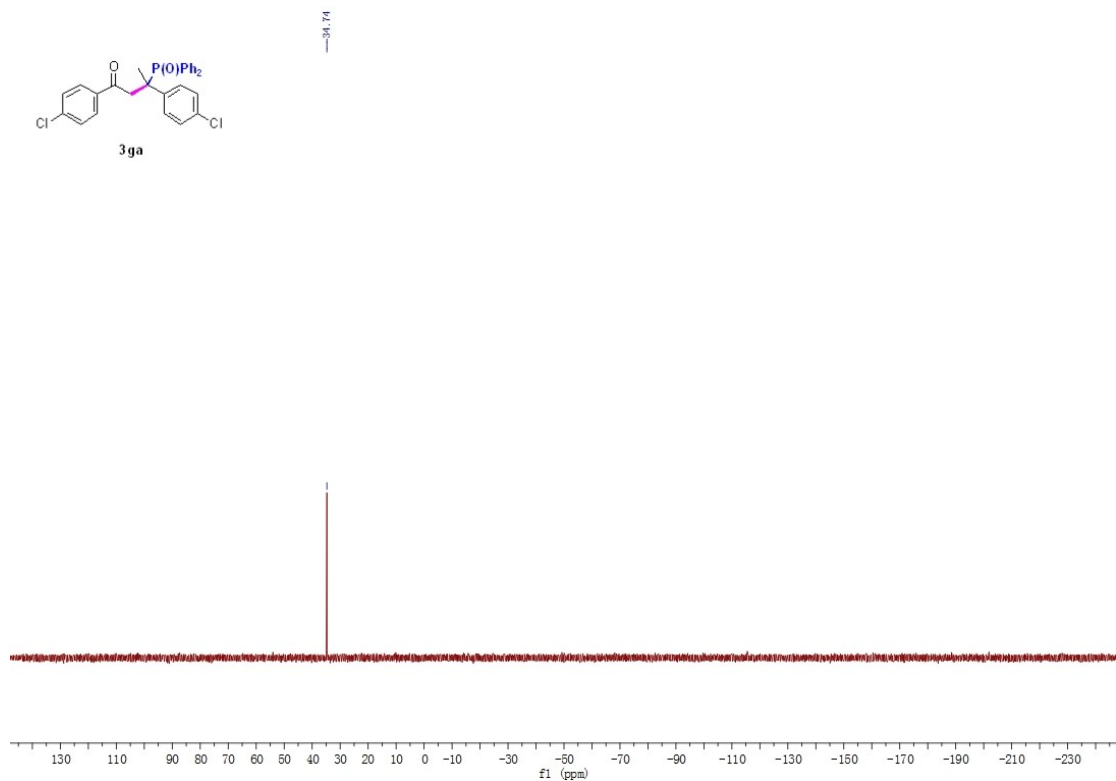

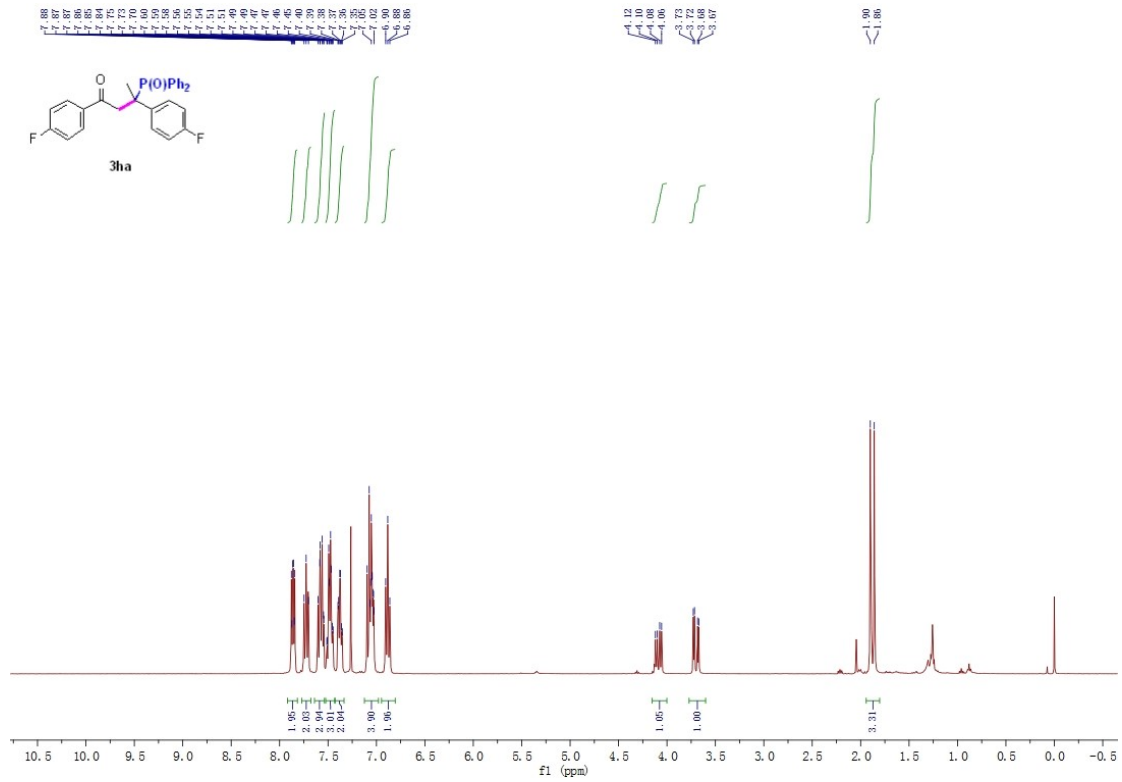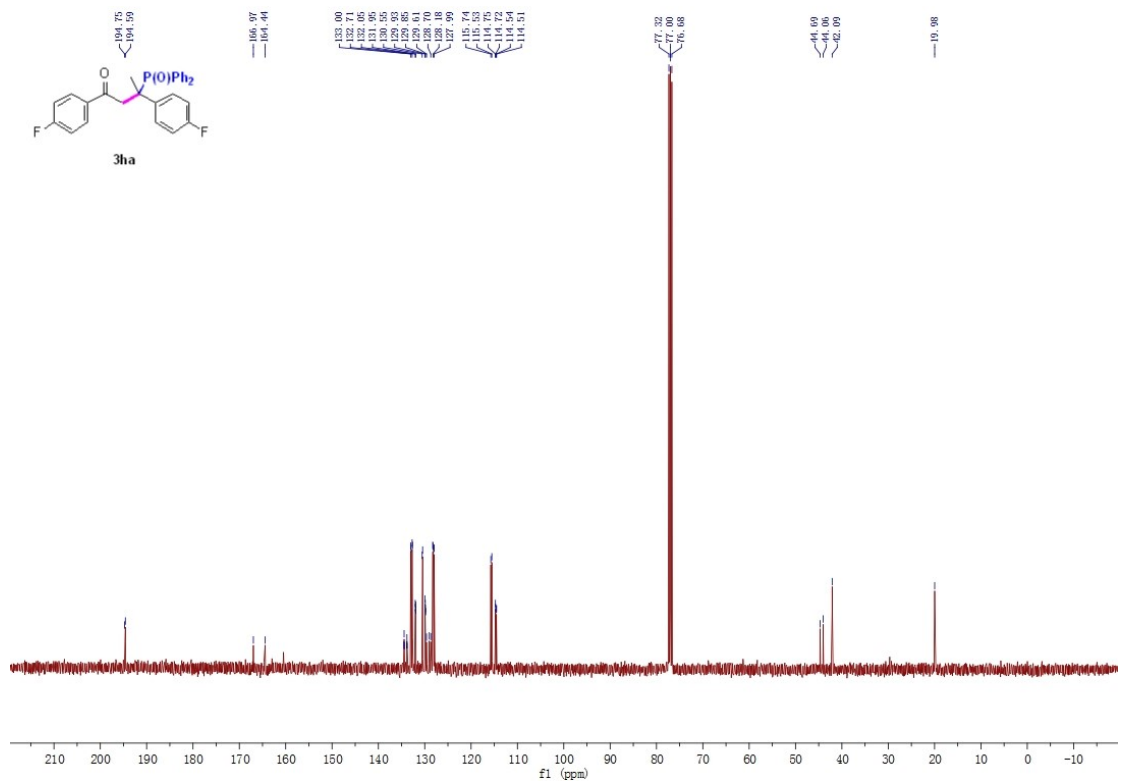



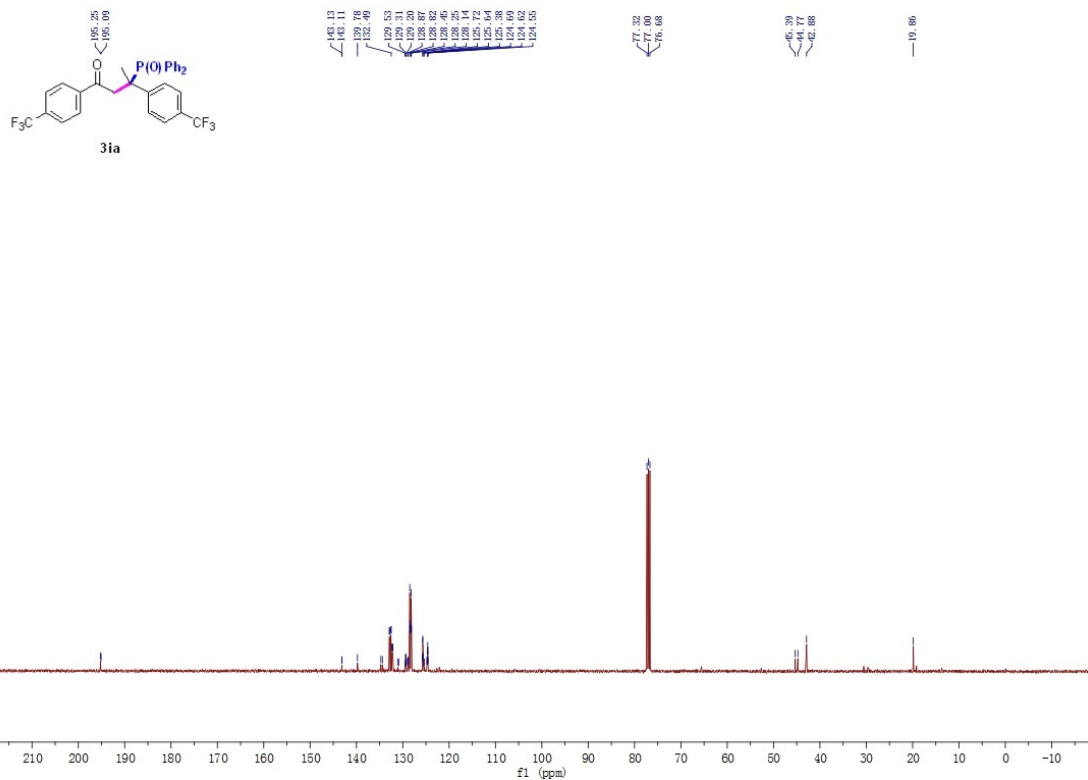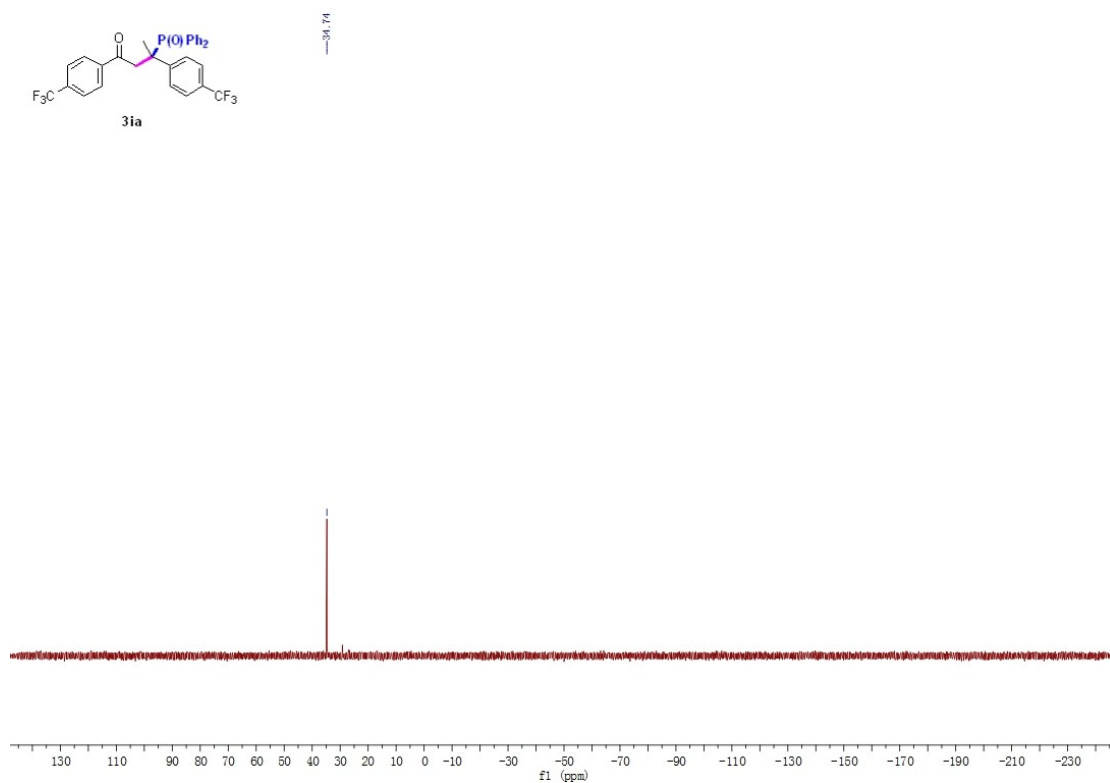



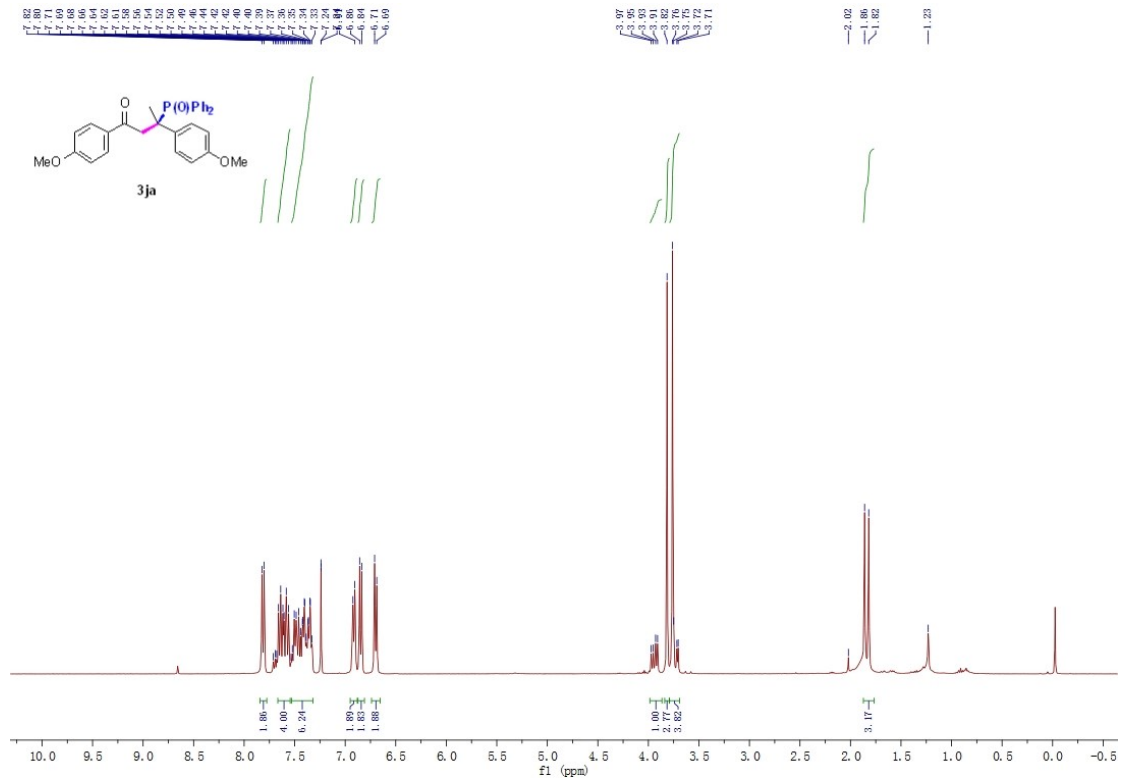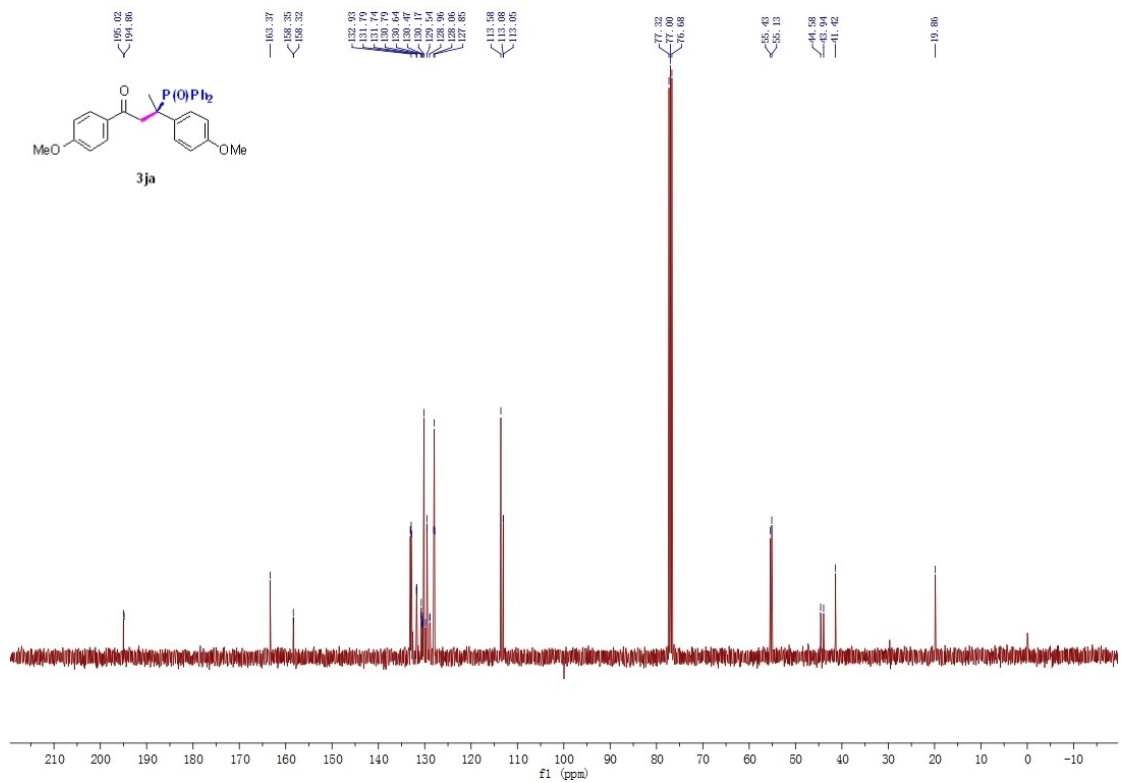

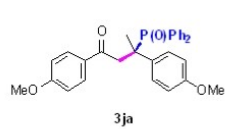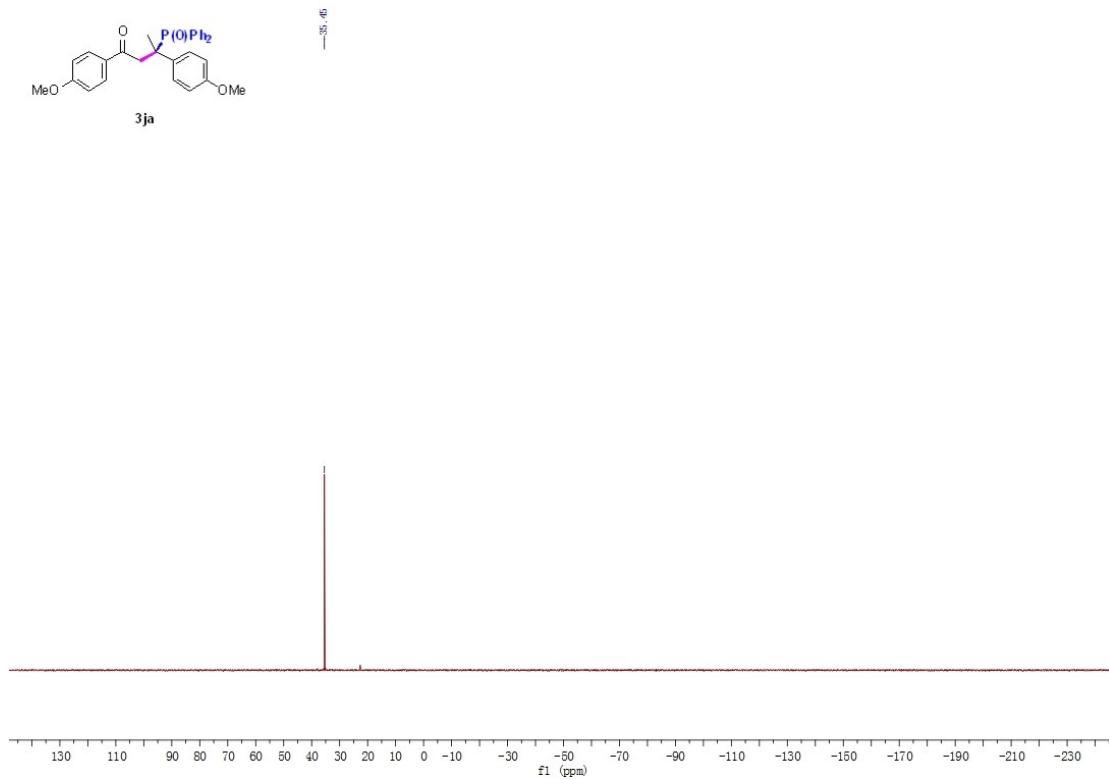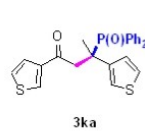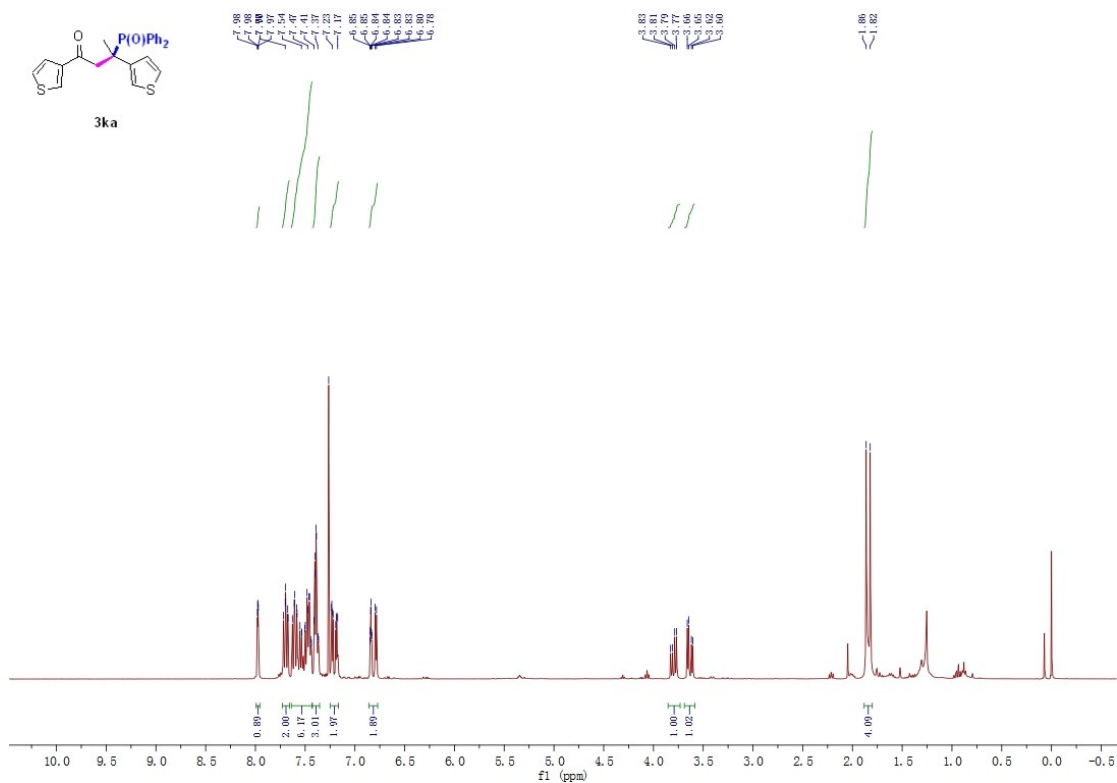

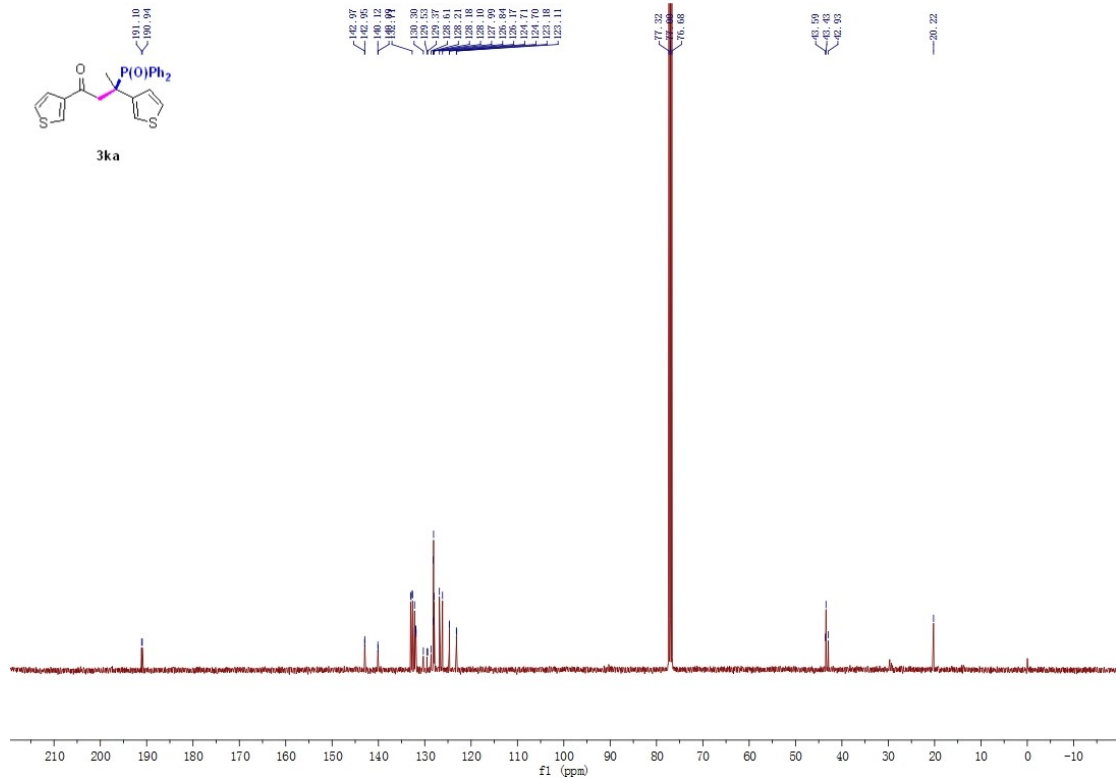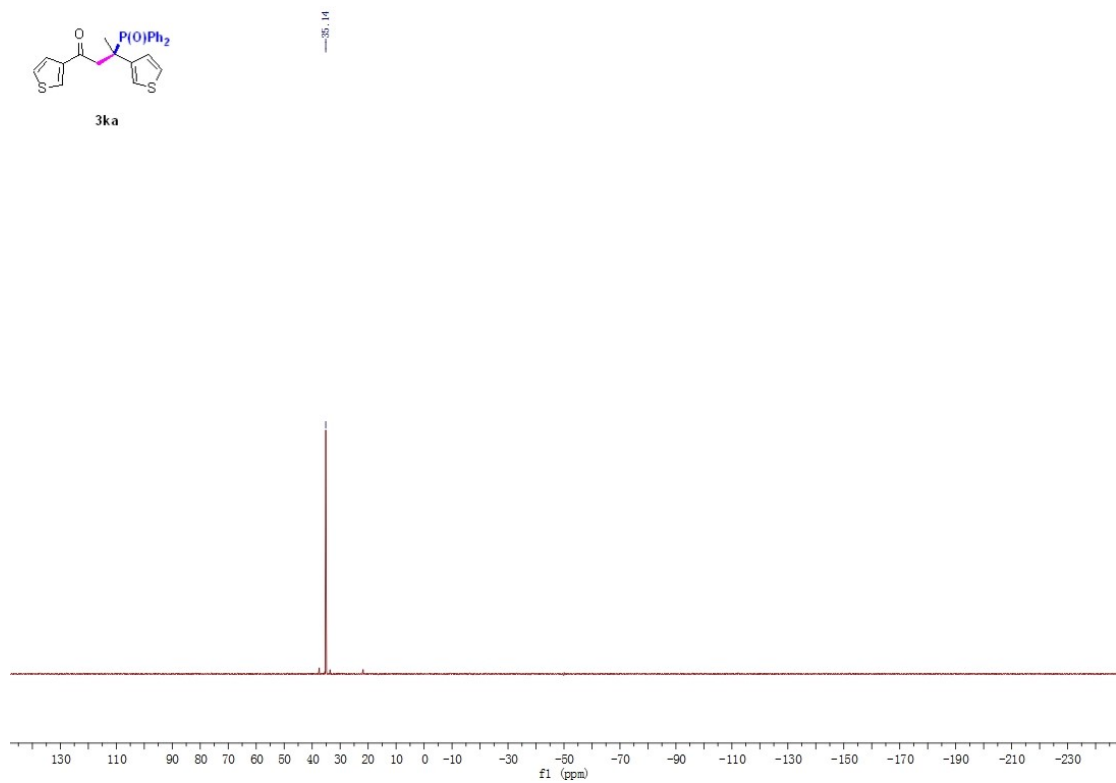

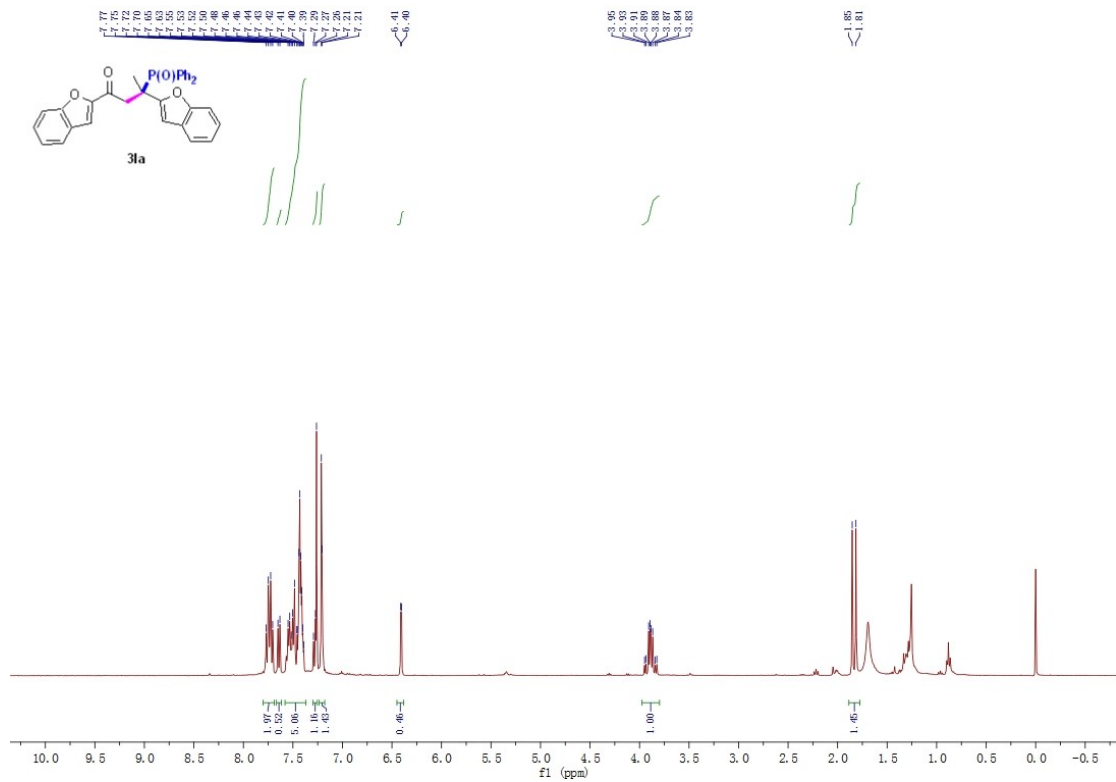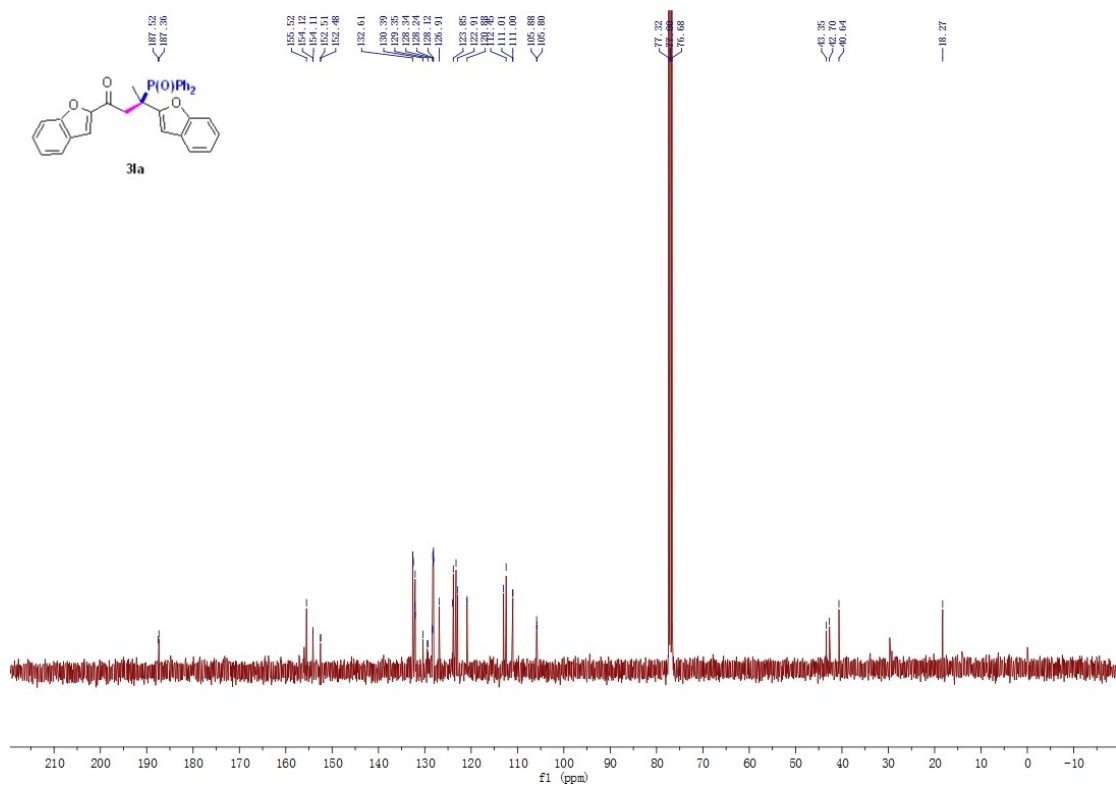

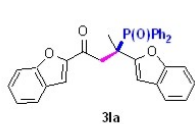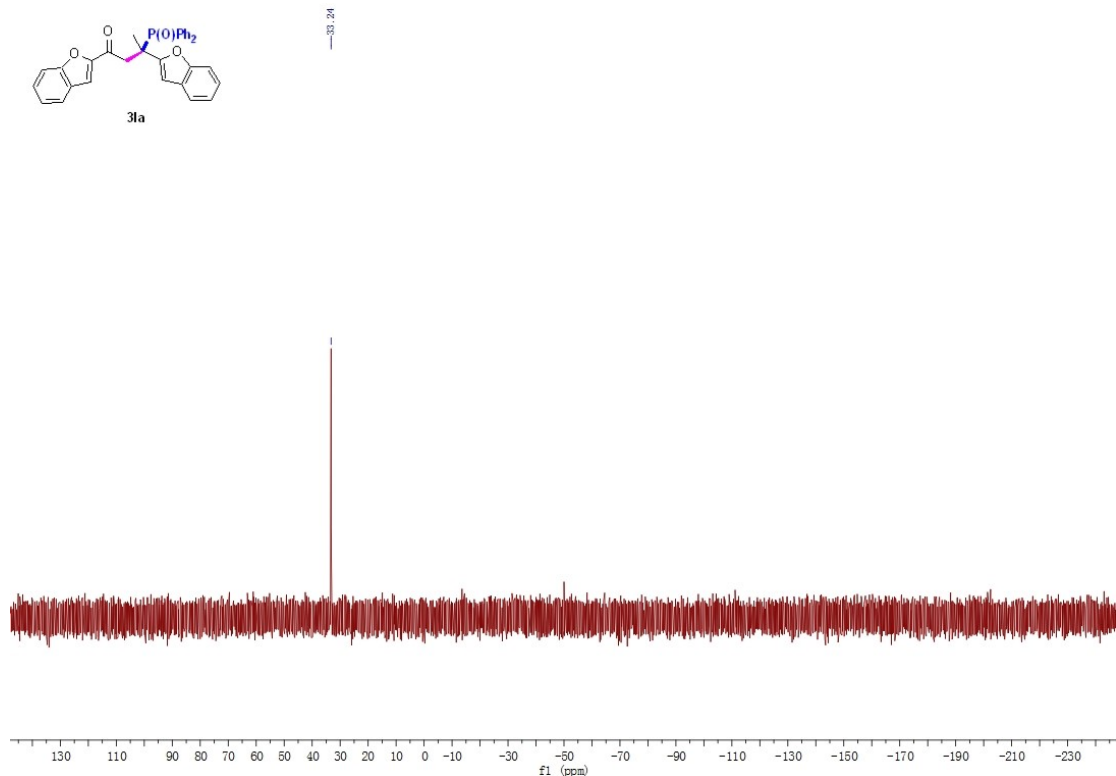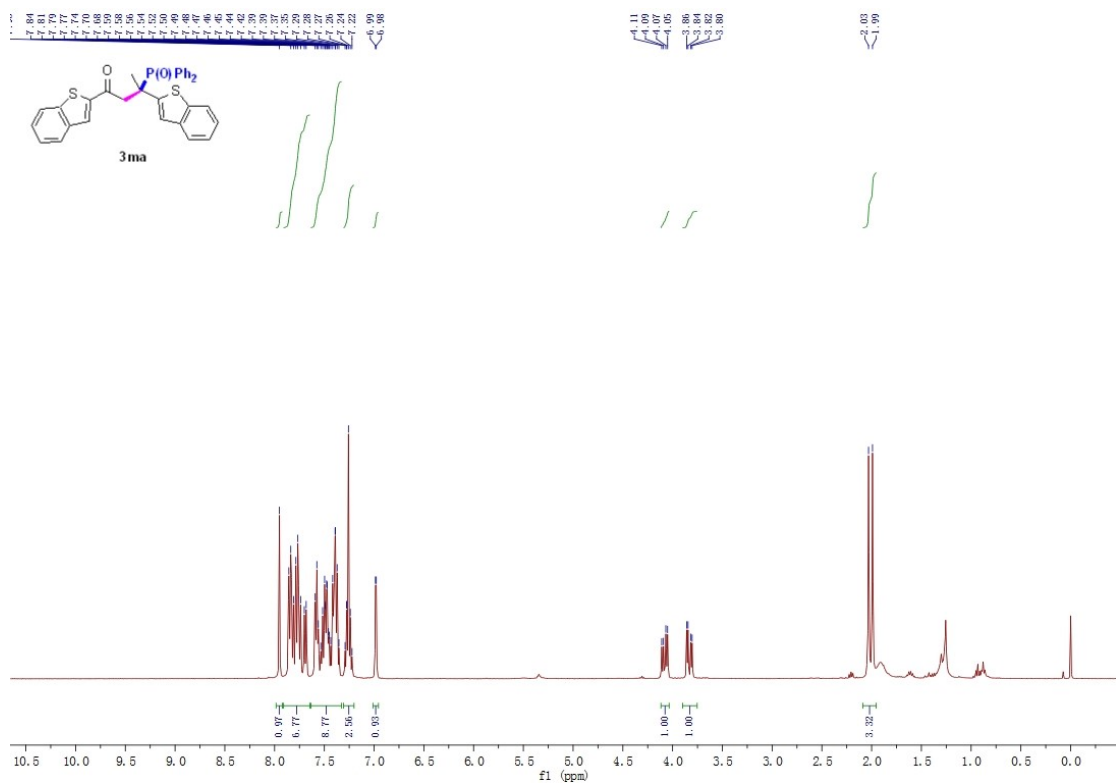

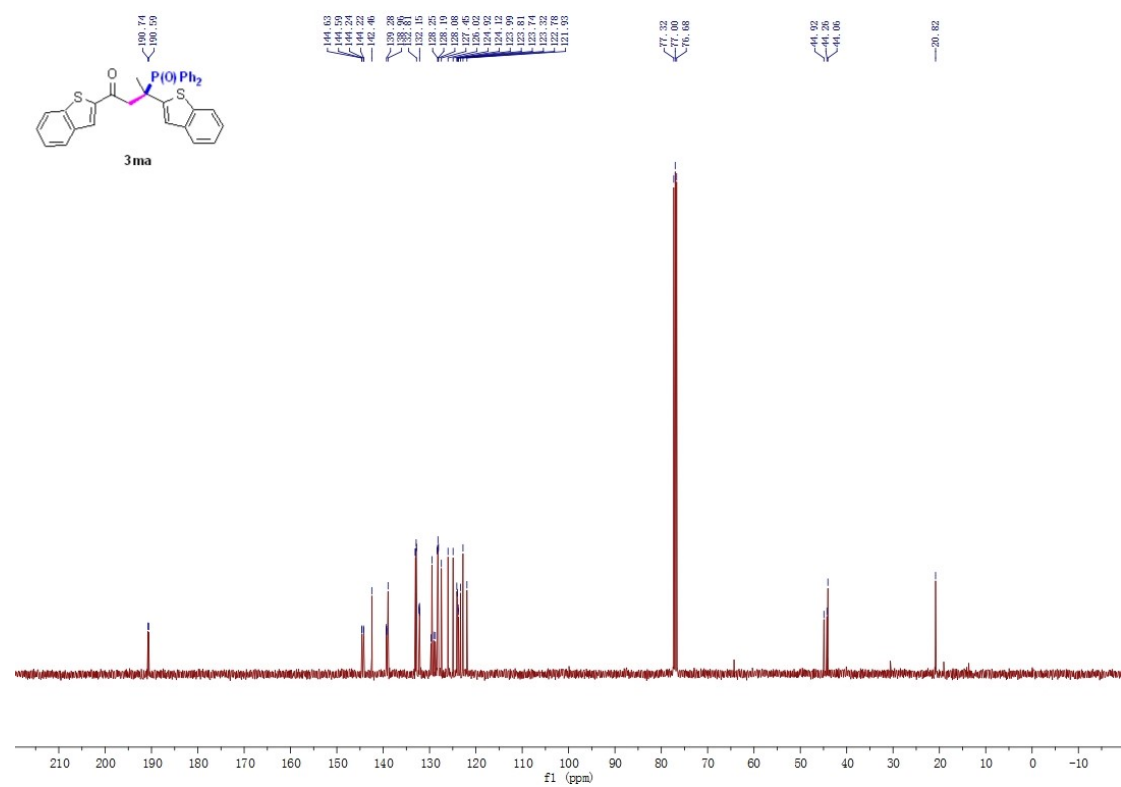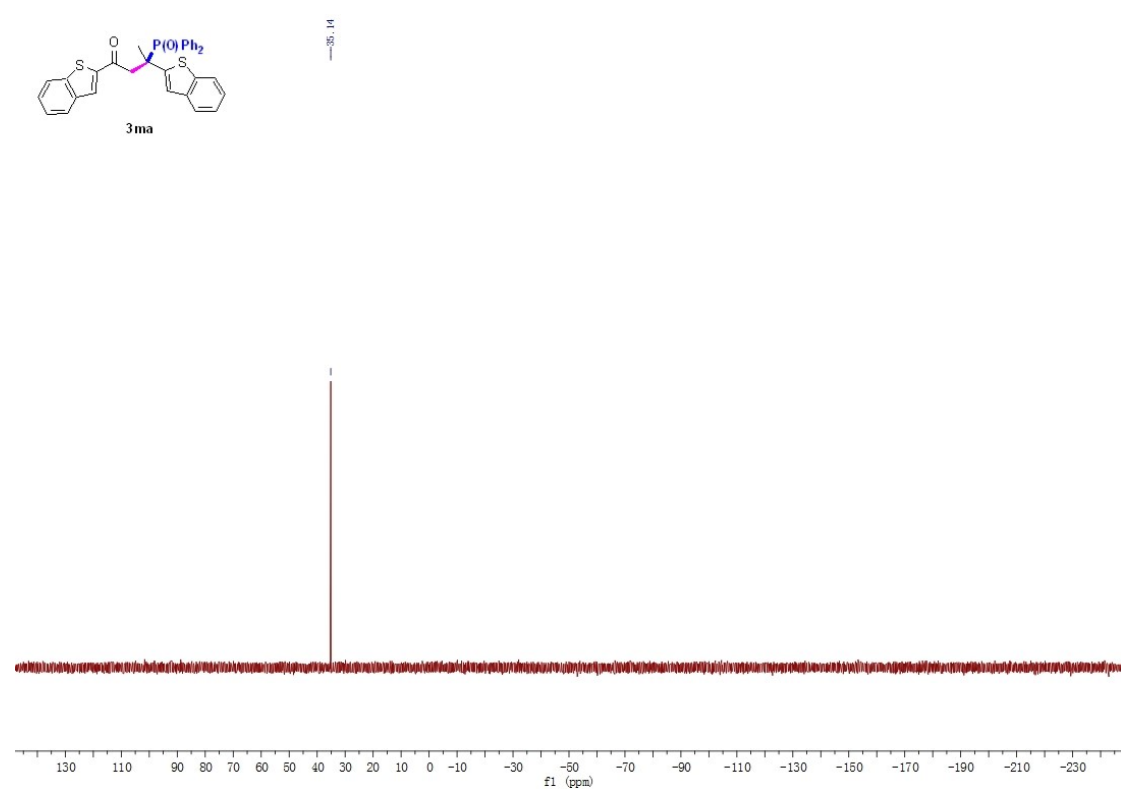

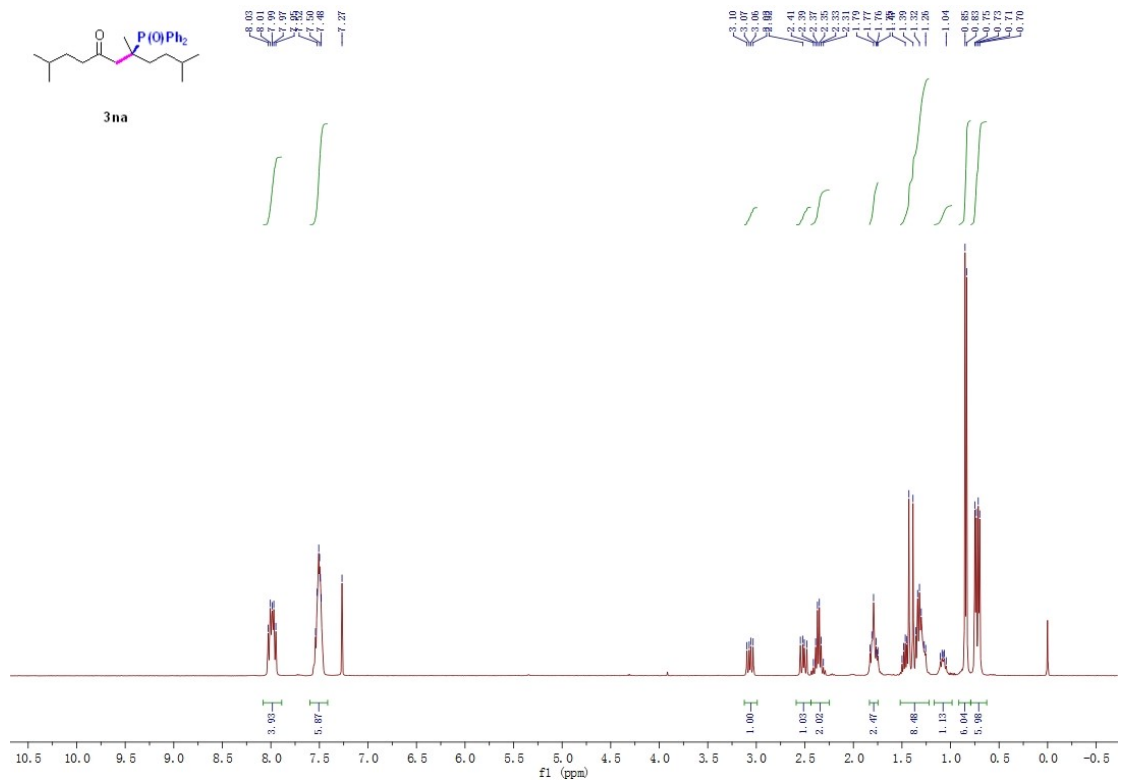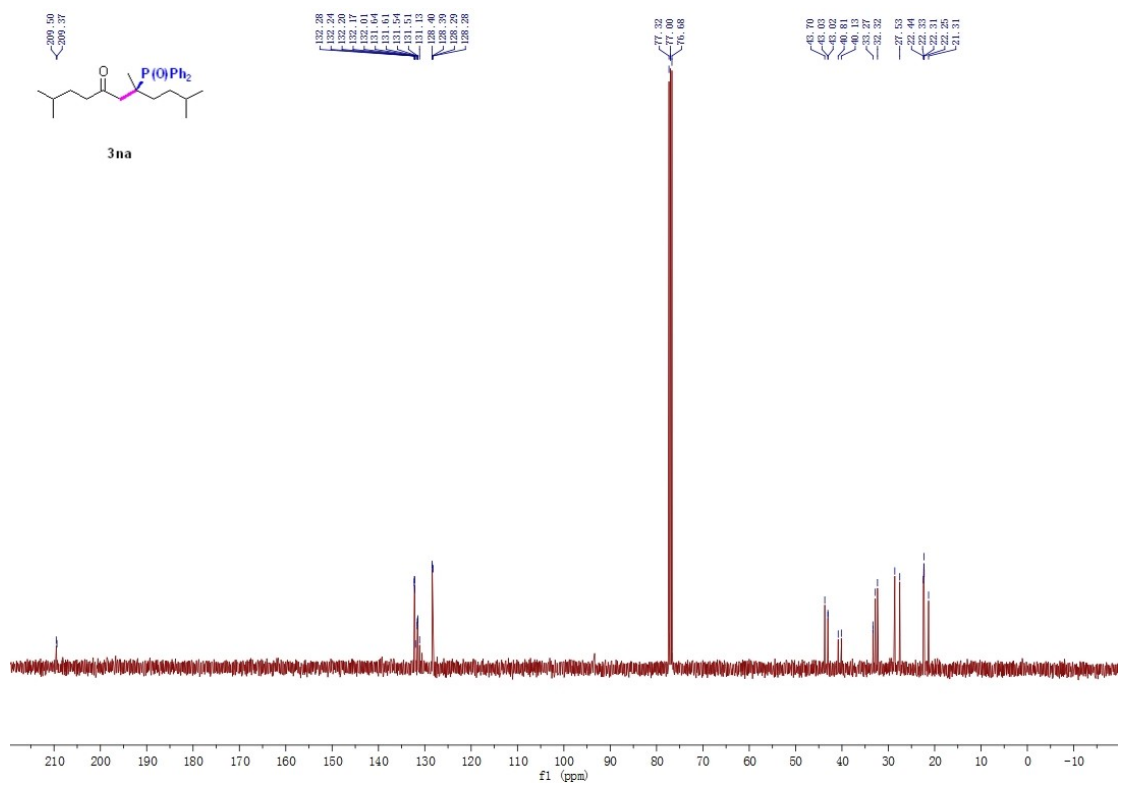

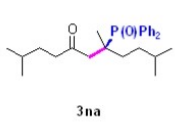

—36.53

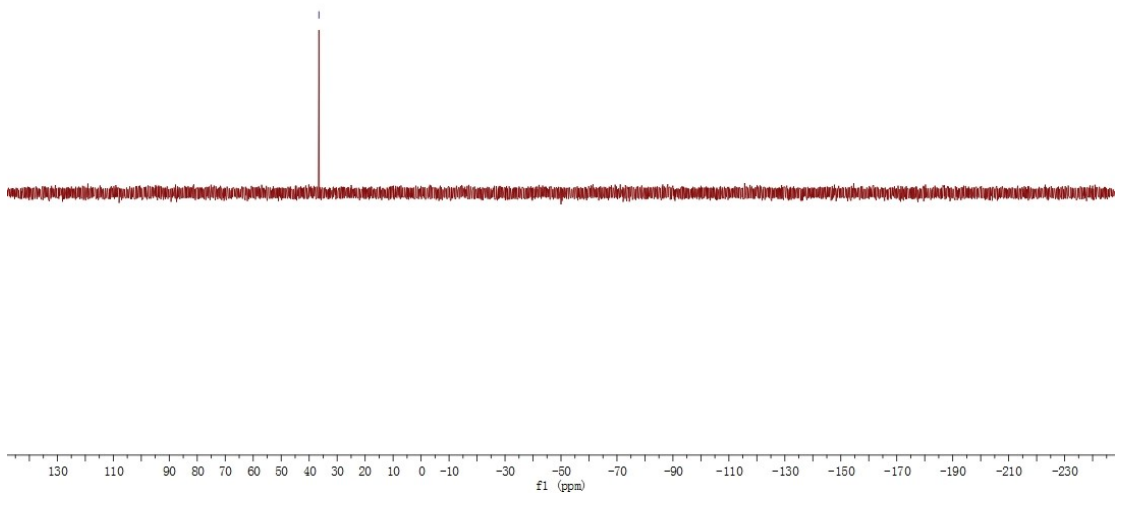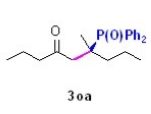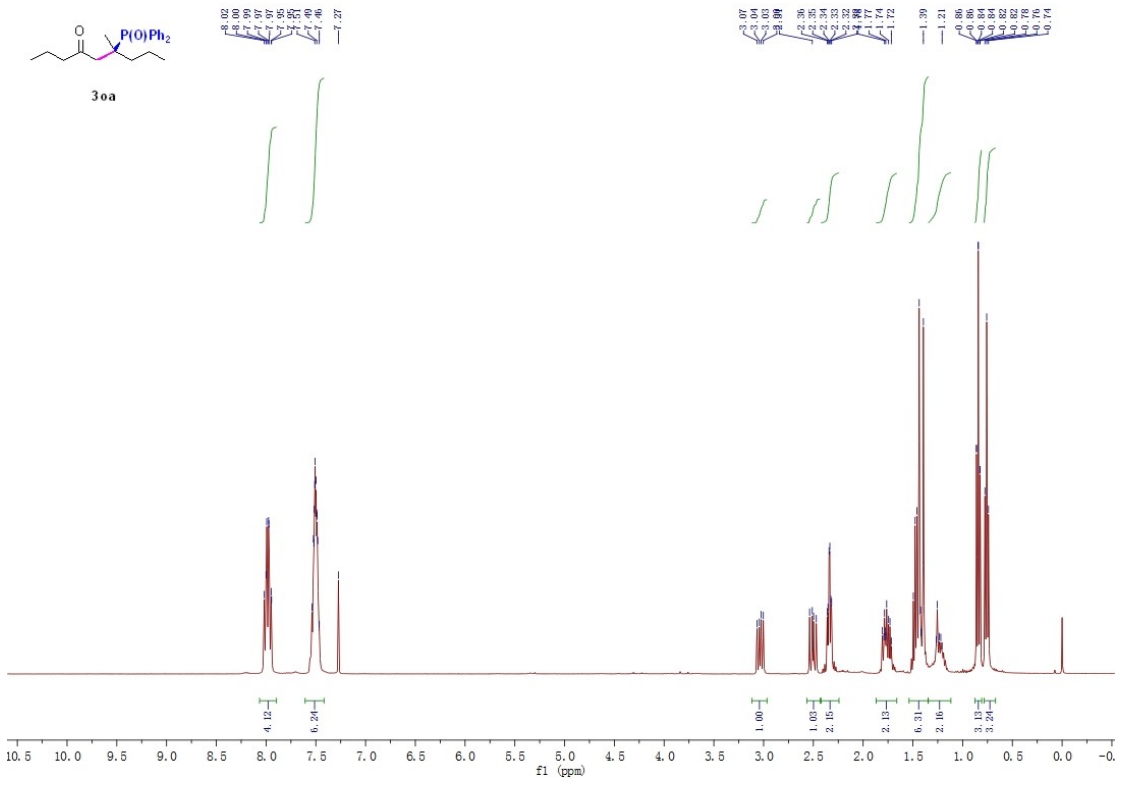



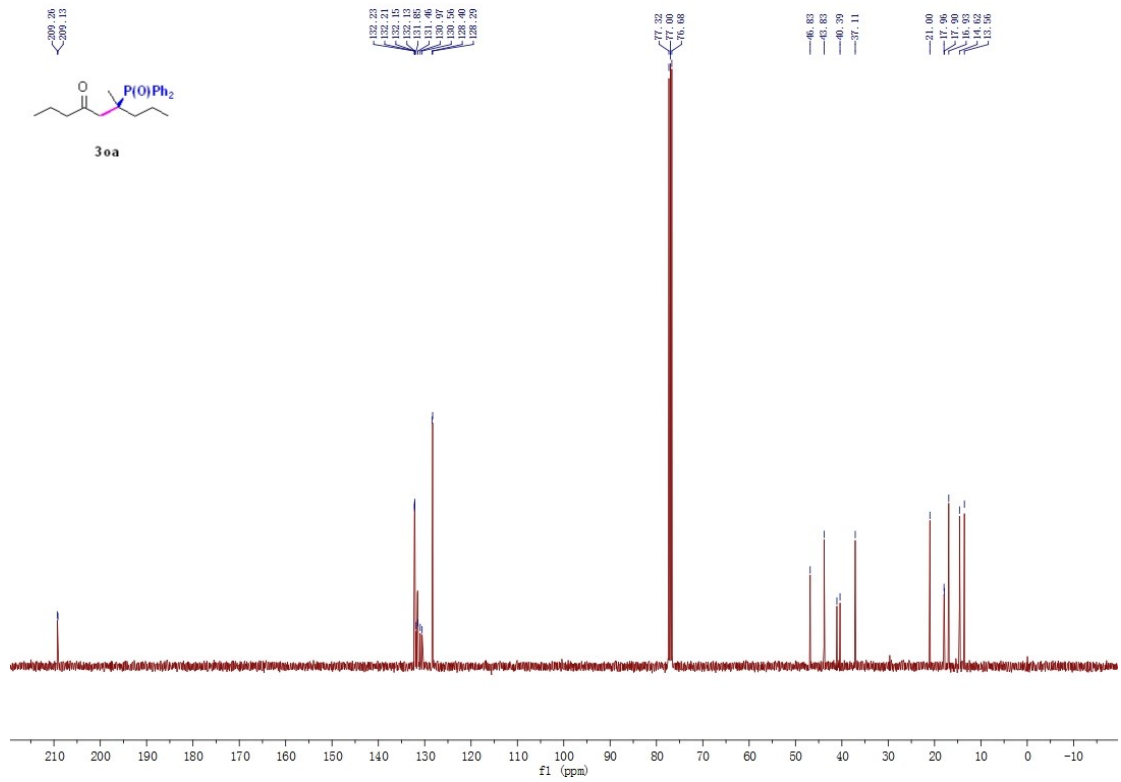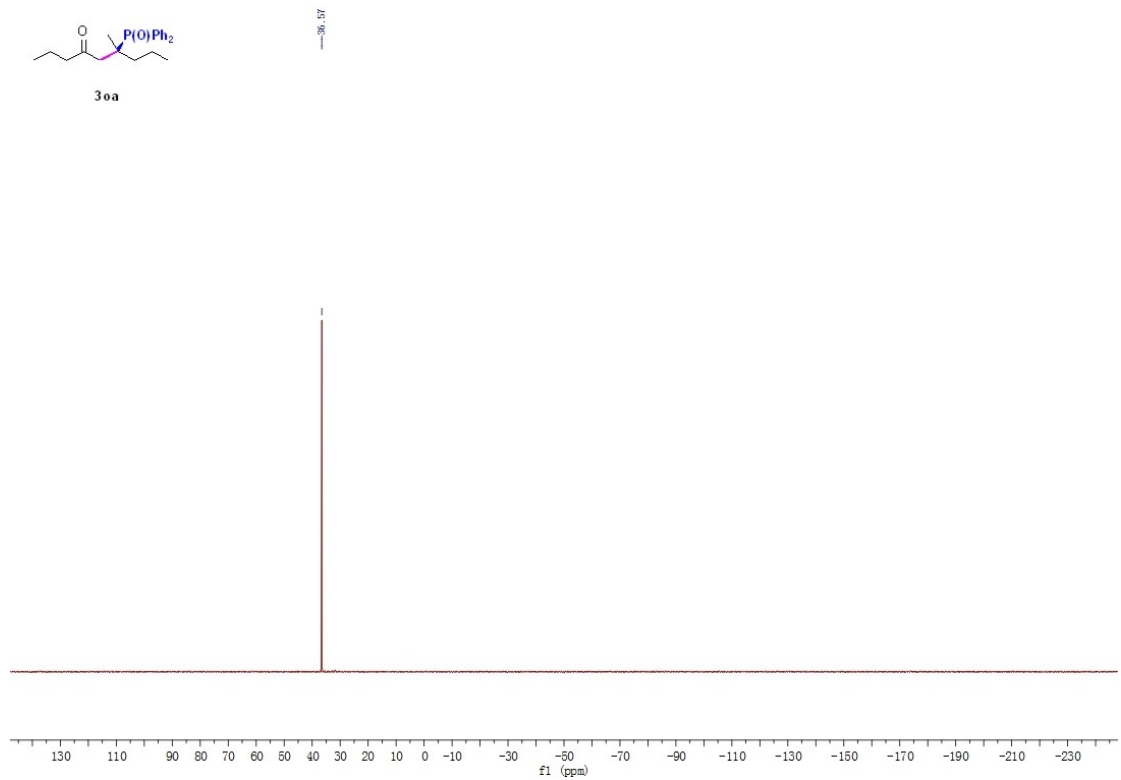



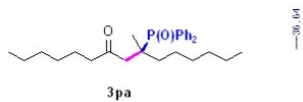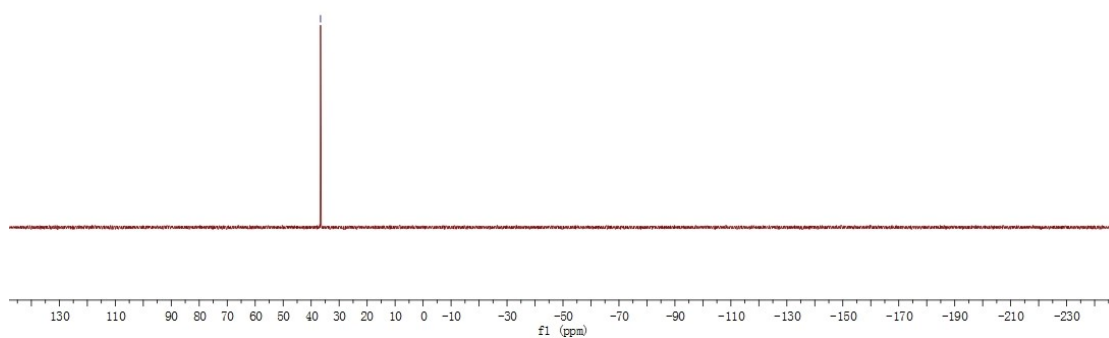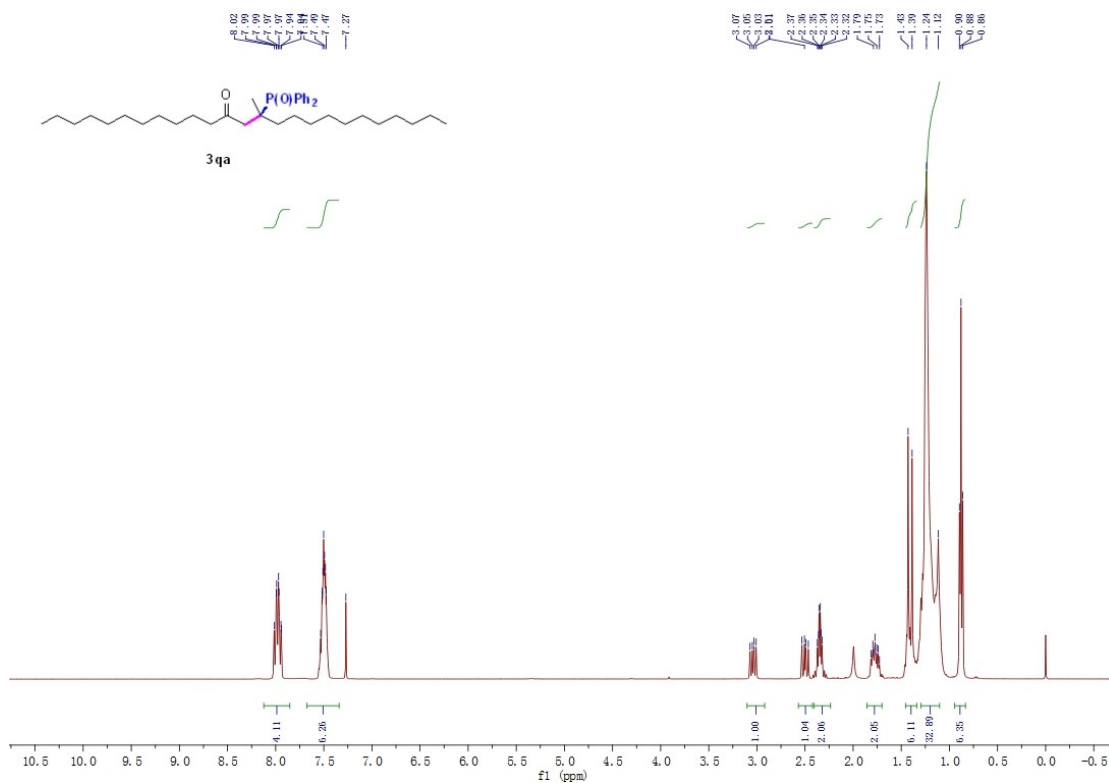

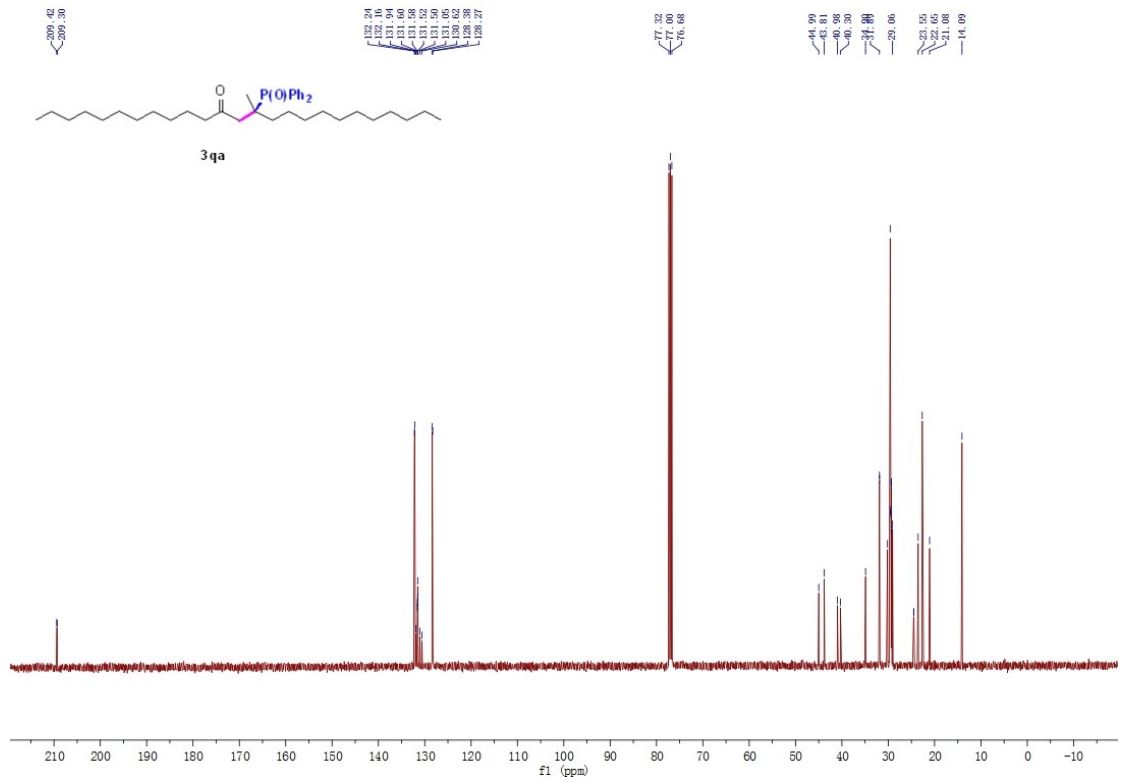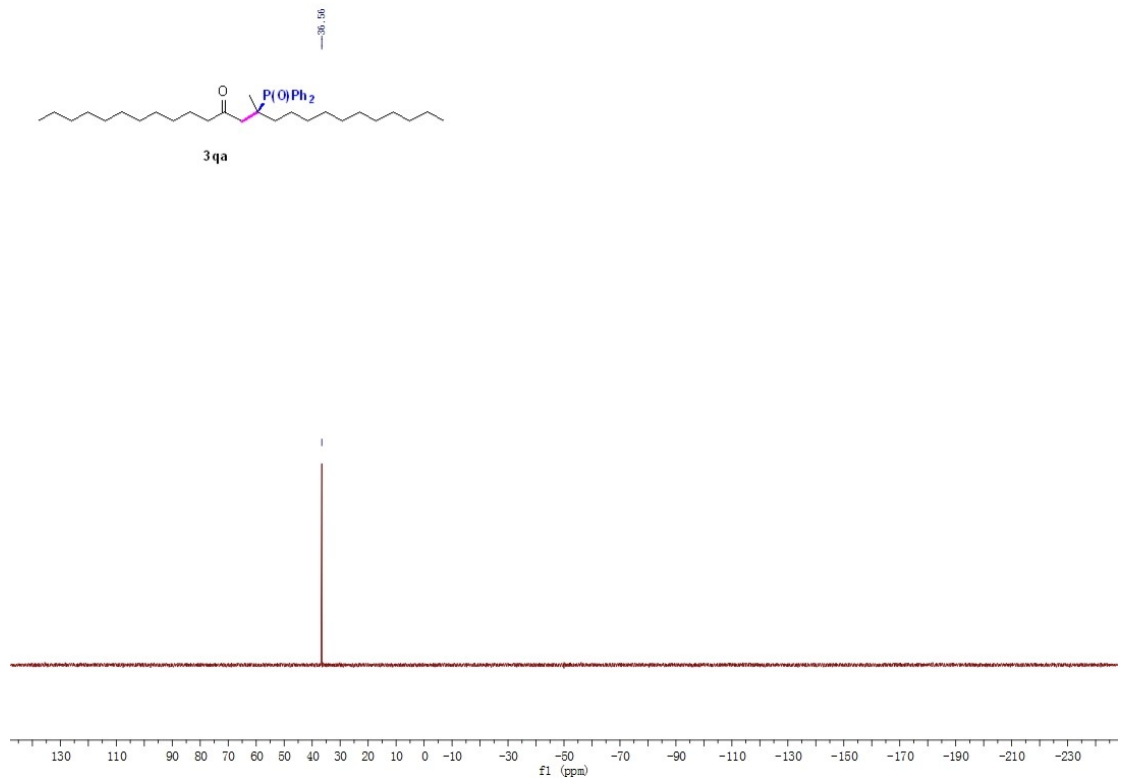

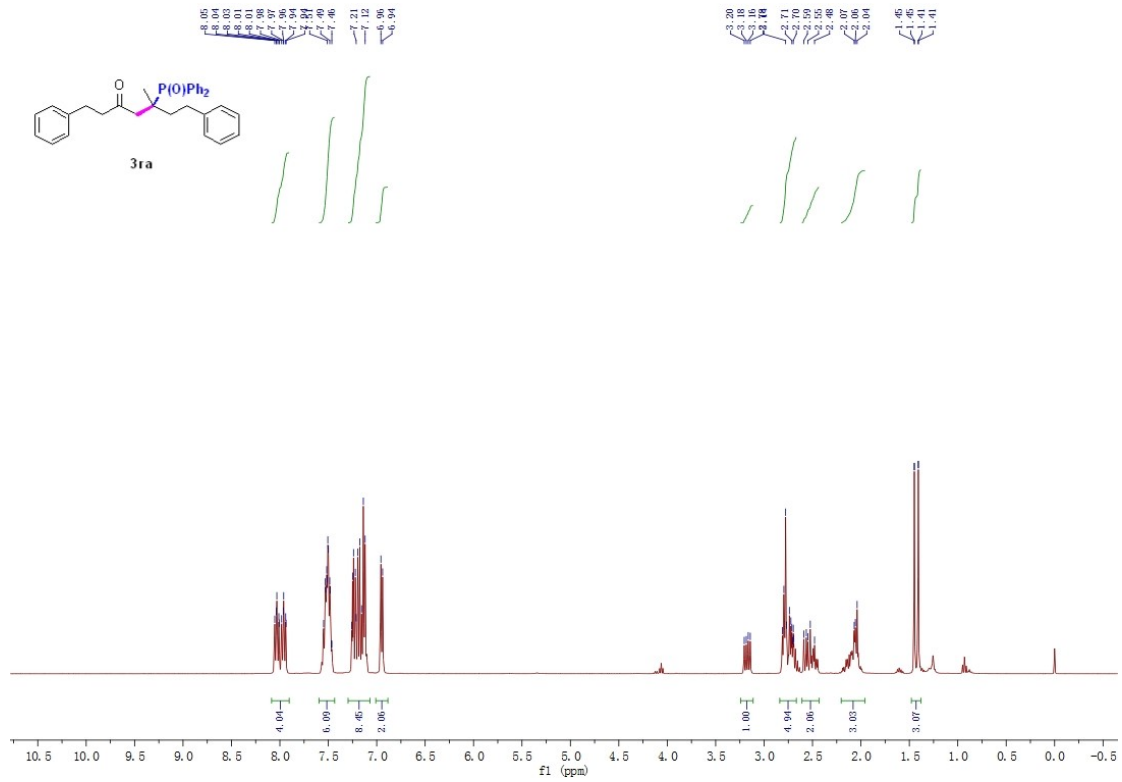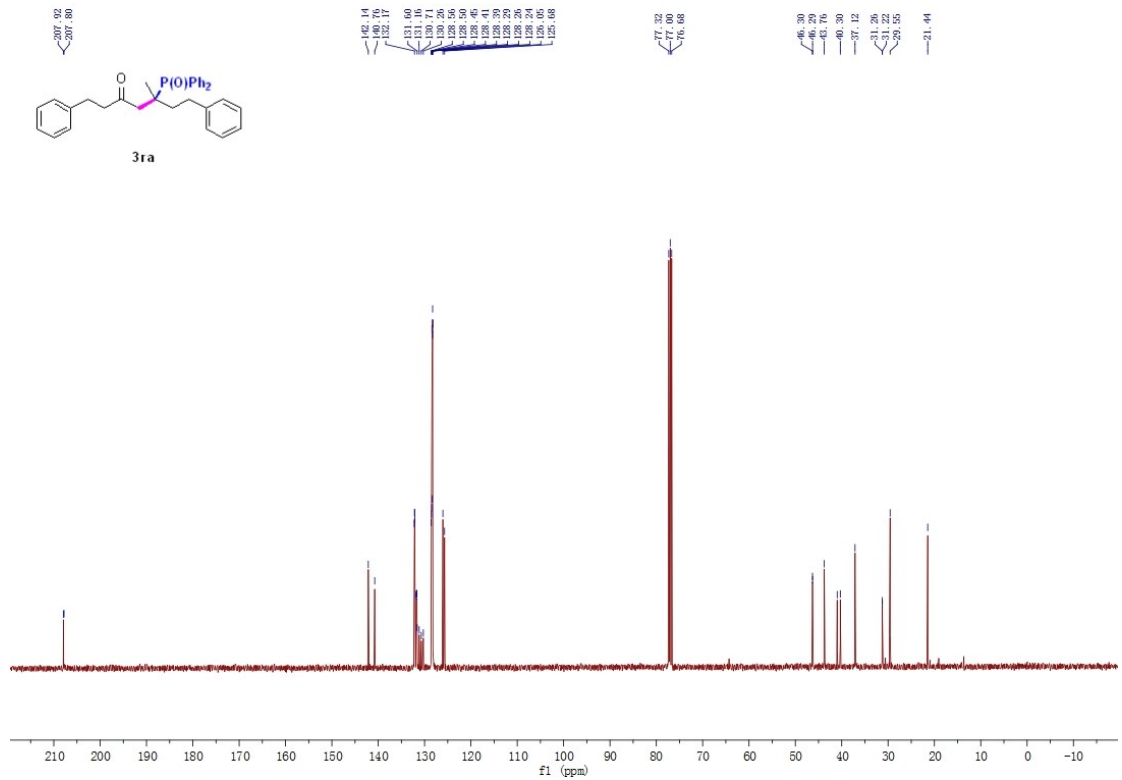

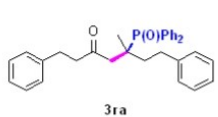

—36.31

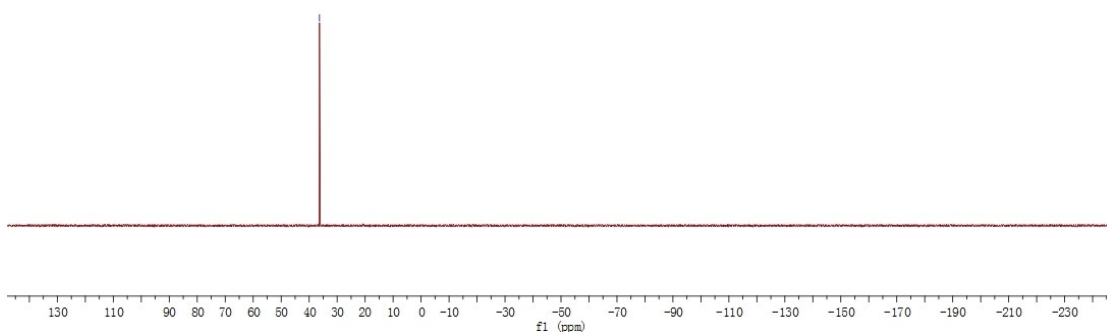

7.714, 7.711, 7.677, 7.655, 7.652, 7.599, 7.555, 7.522, 7.474, 7.461, 7.433, 7.421, 7.411, 7.399, 7.377, 7.356, 7.350, 7.000, 6.998, 6.989, 6.988, 3.881, 3.879, 3.877, 3.874, 2.332, 1.881

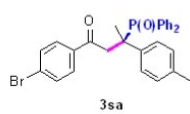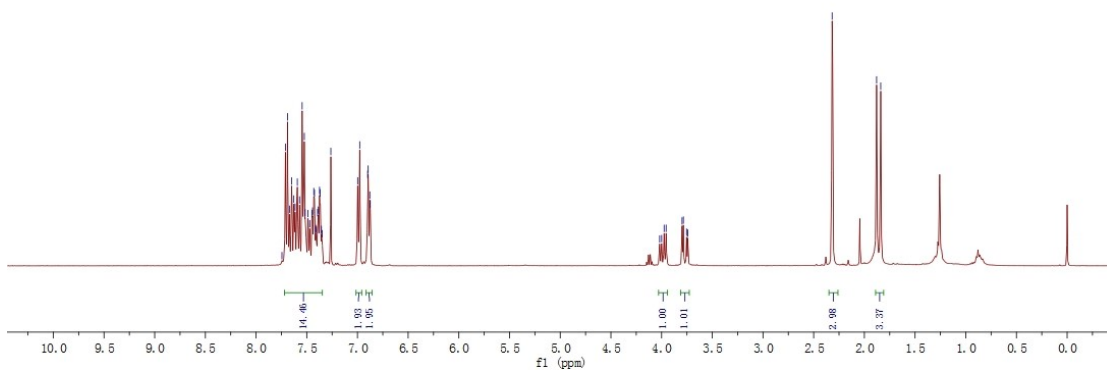

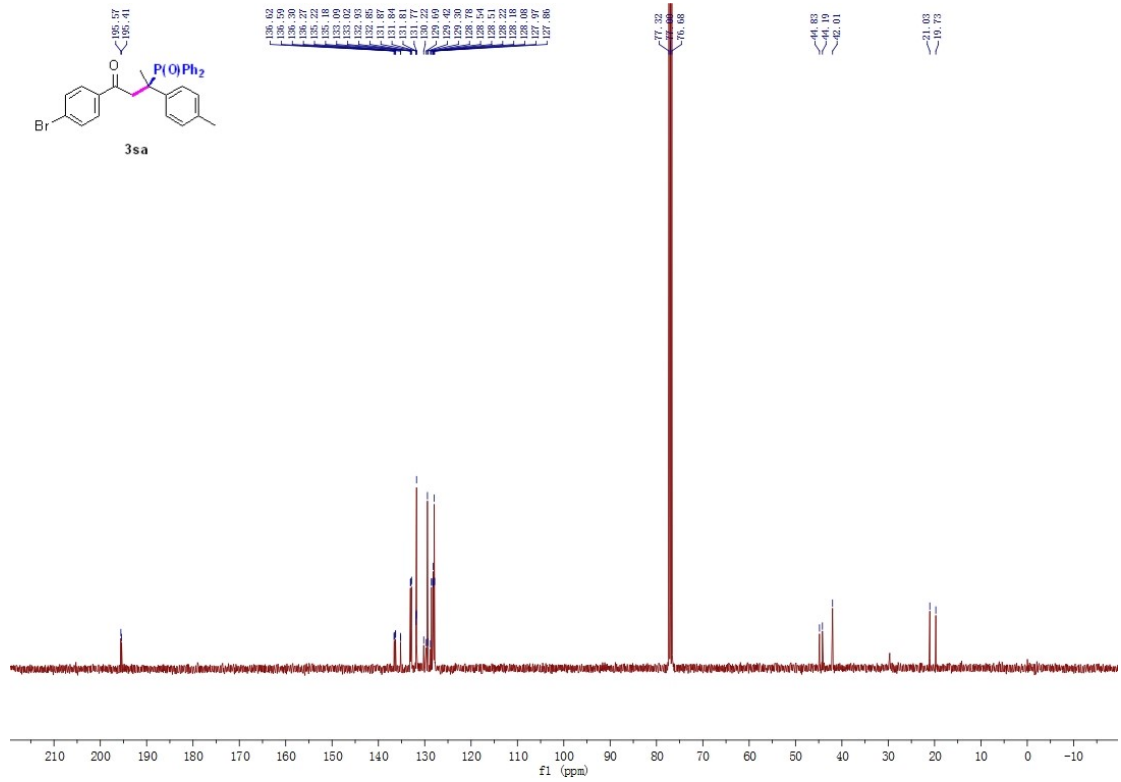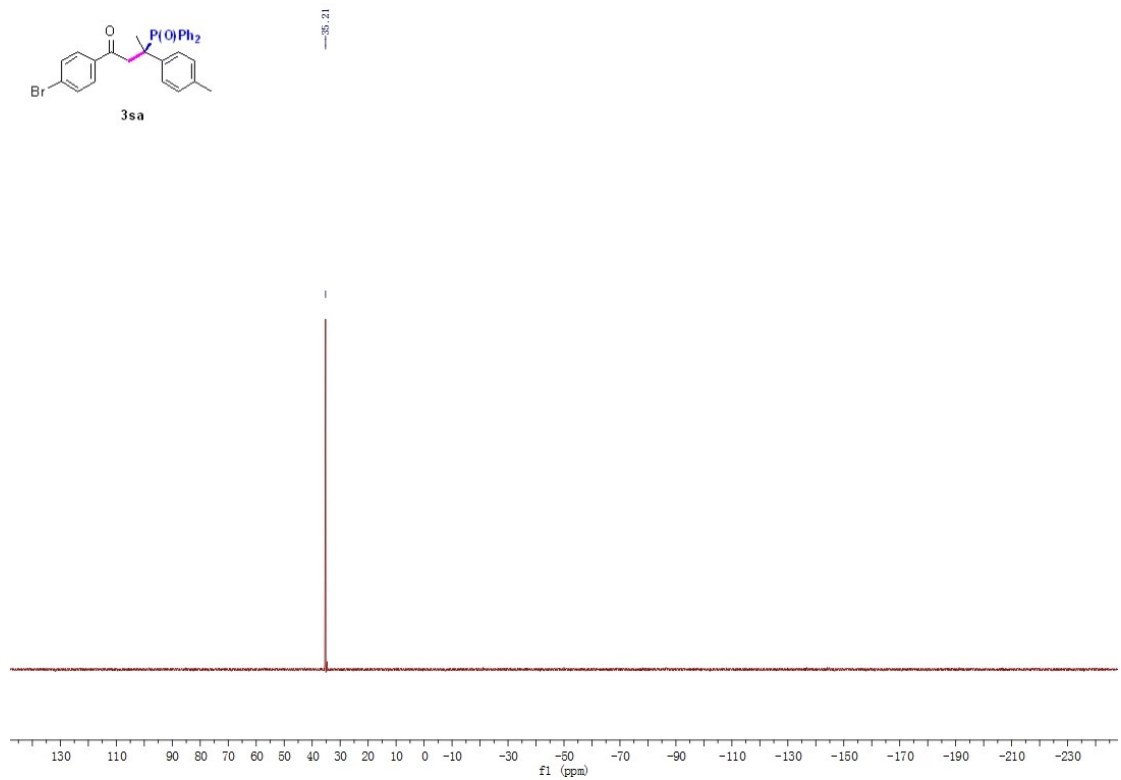

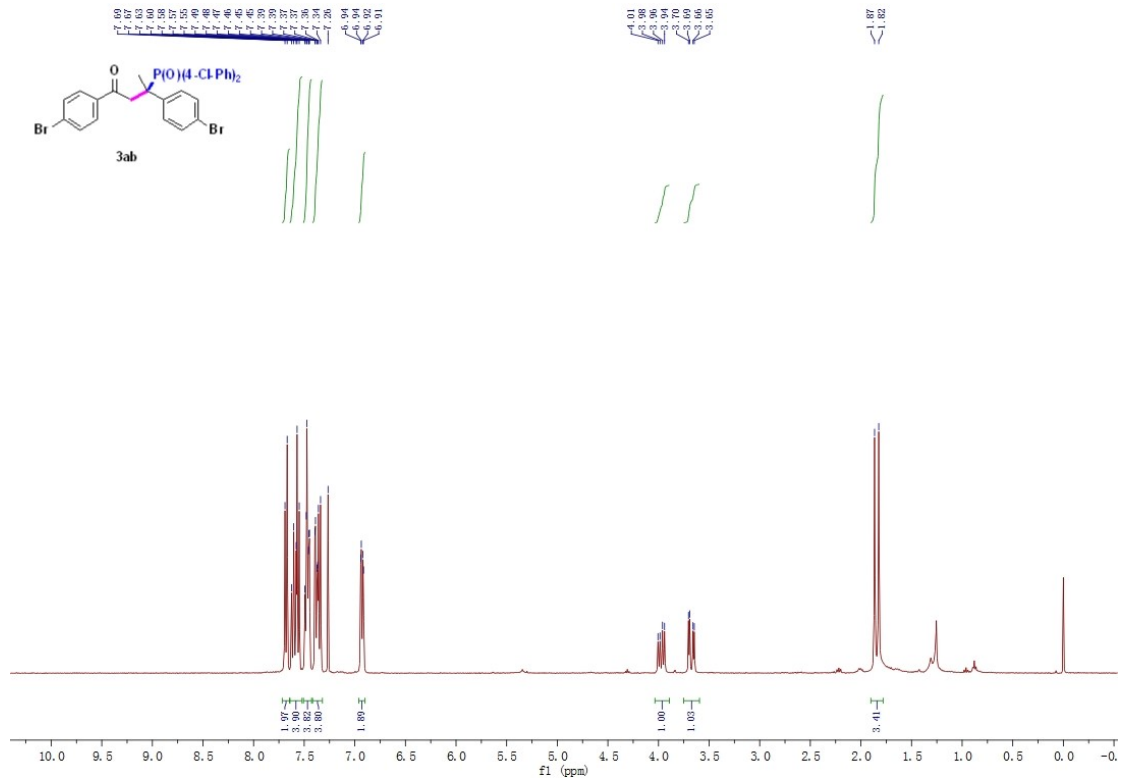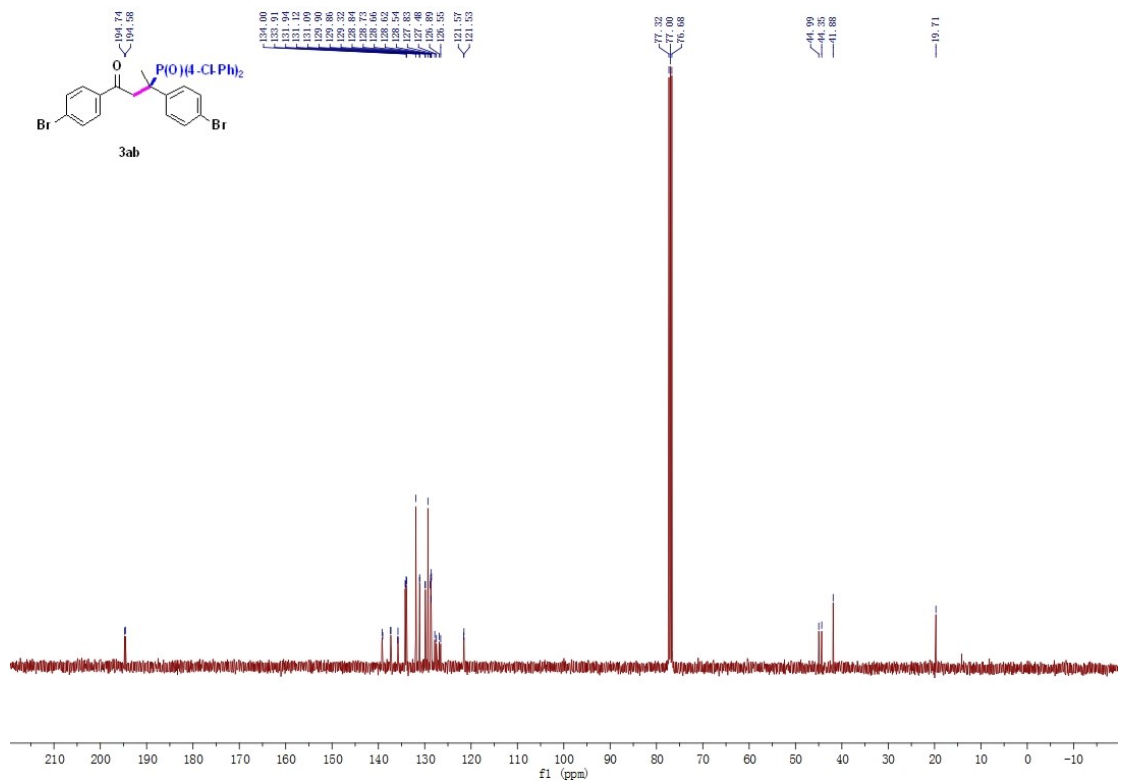



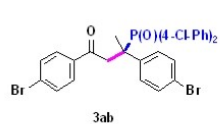

→ 94.03

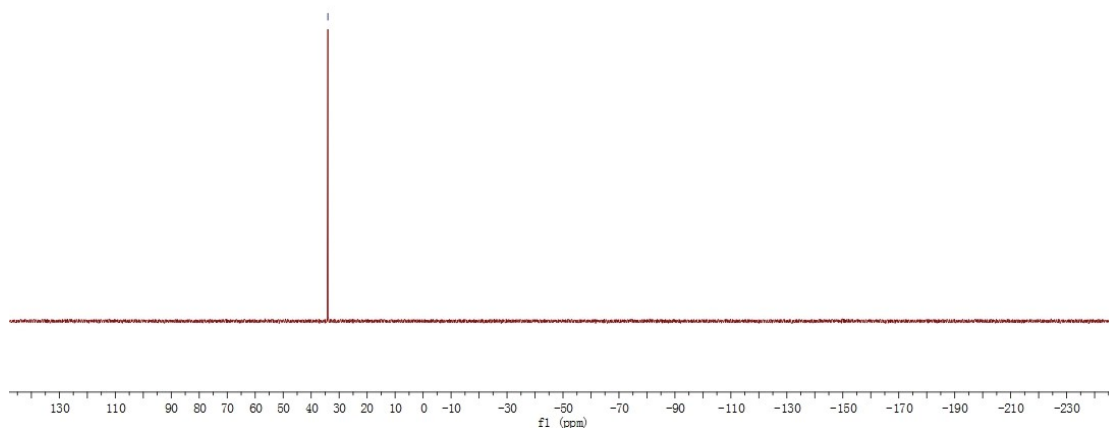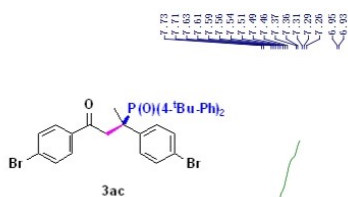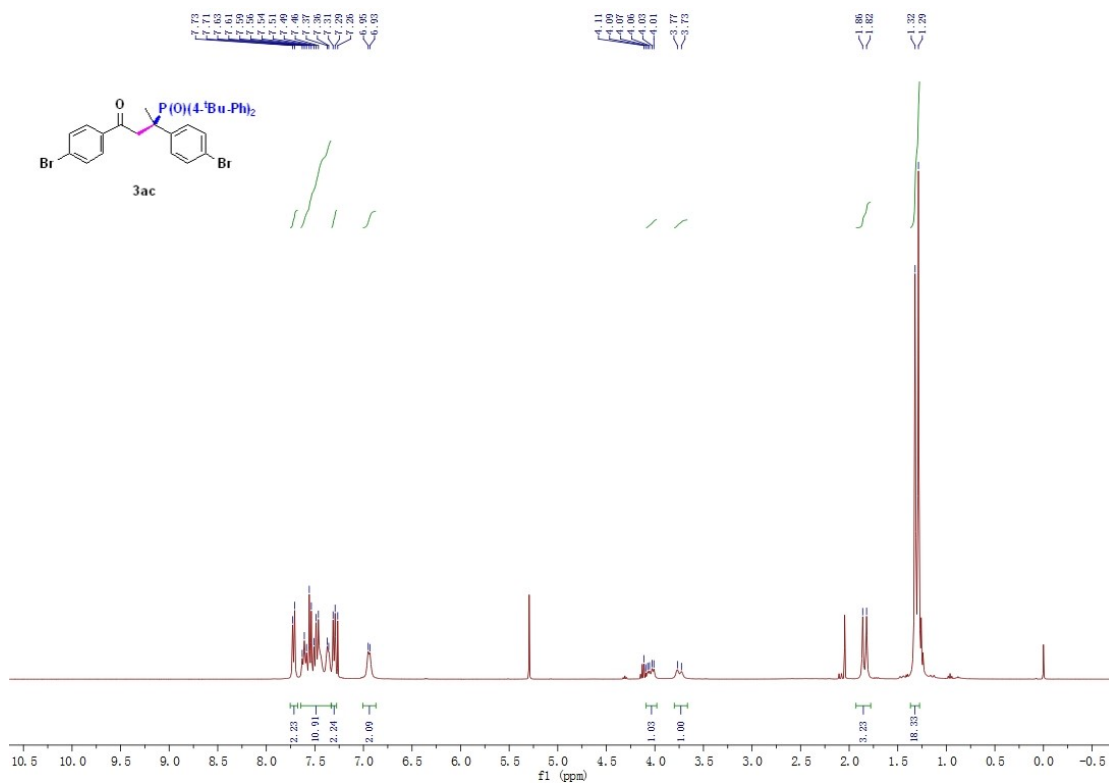

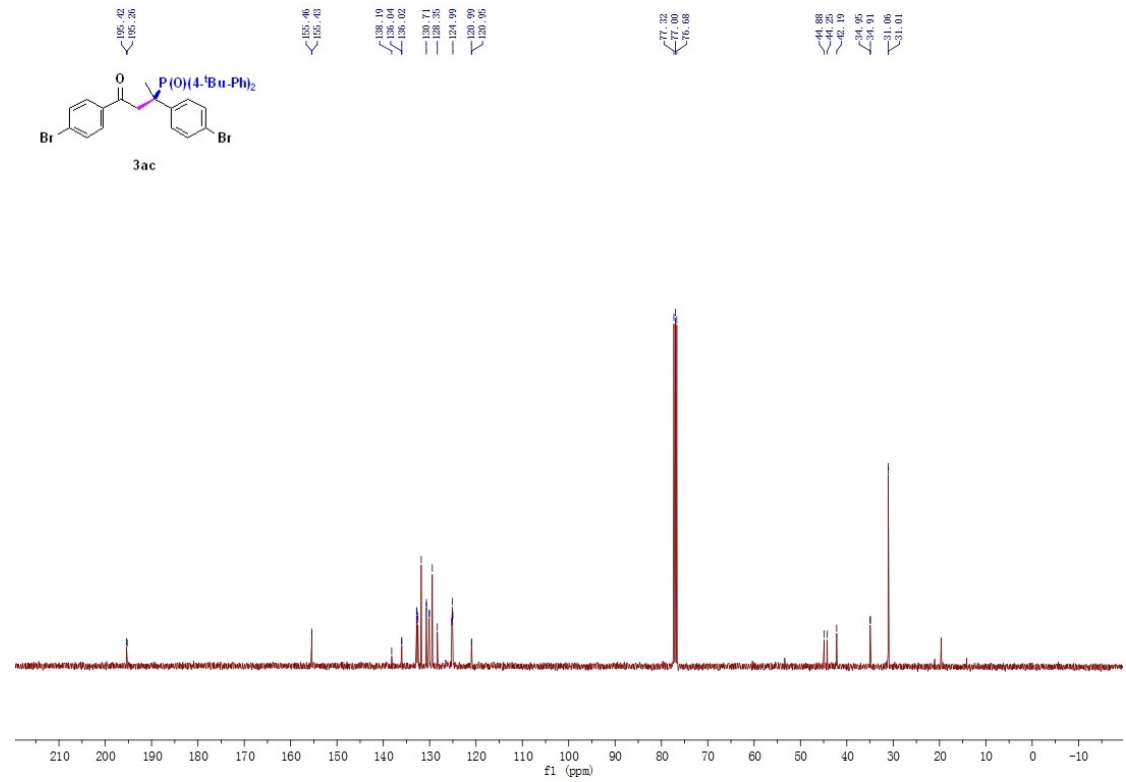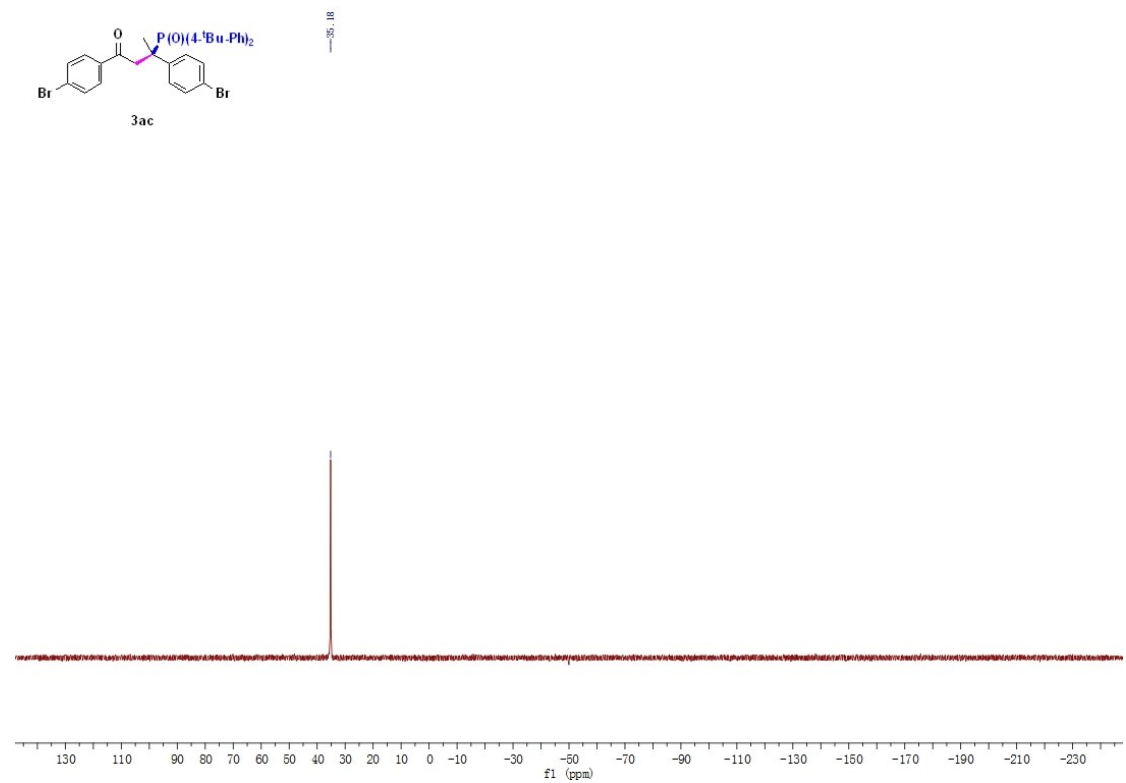

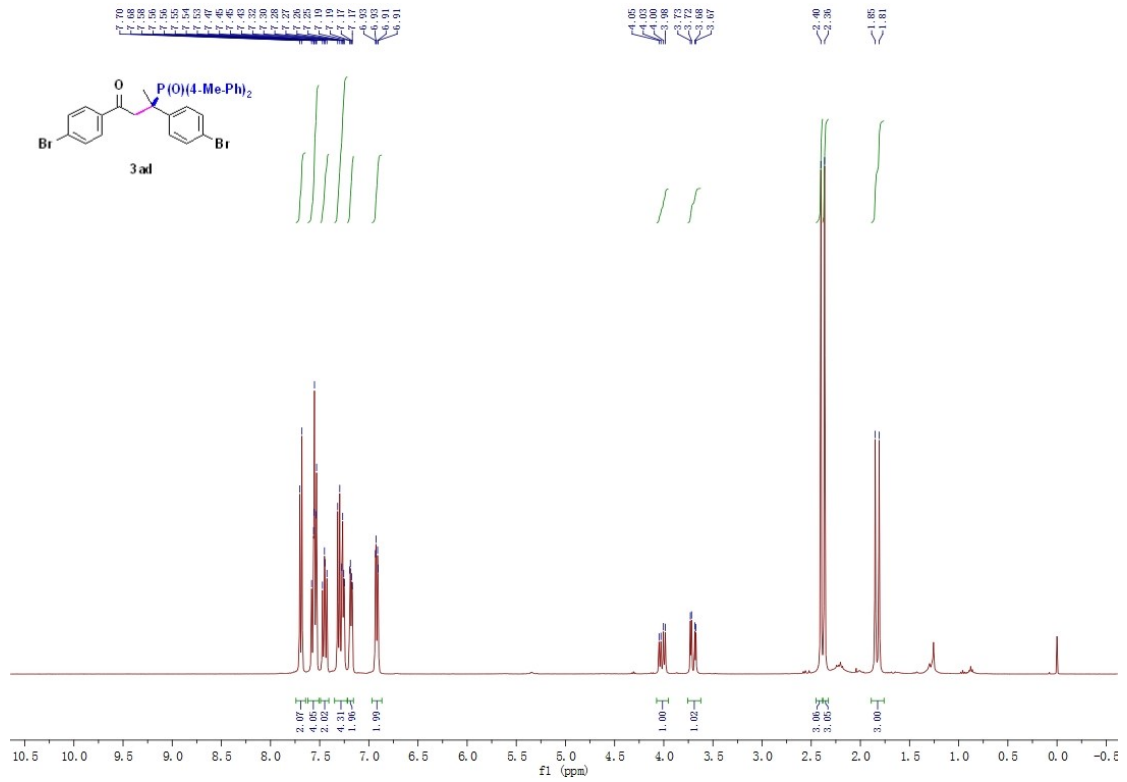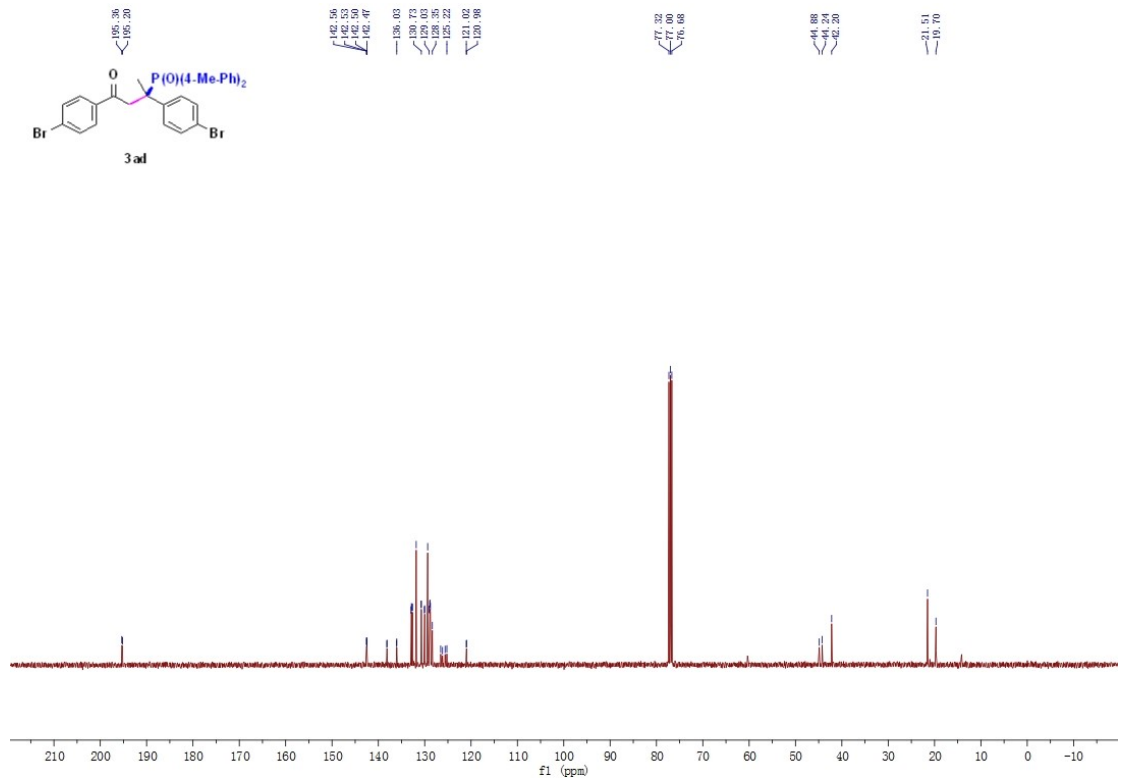

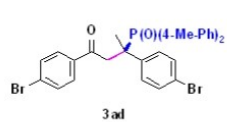

—35.14

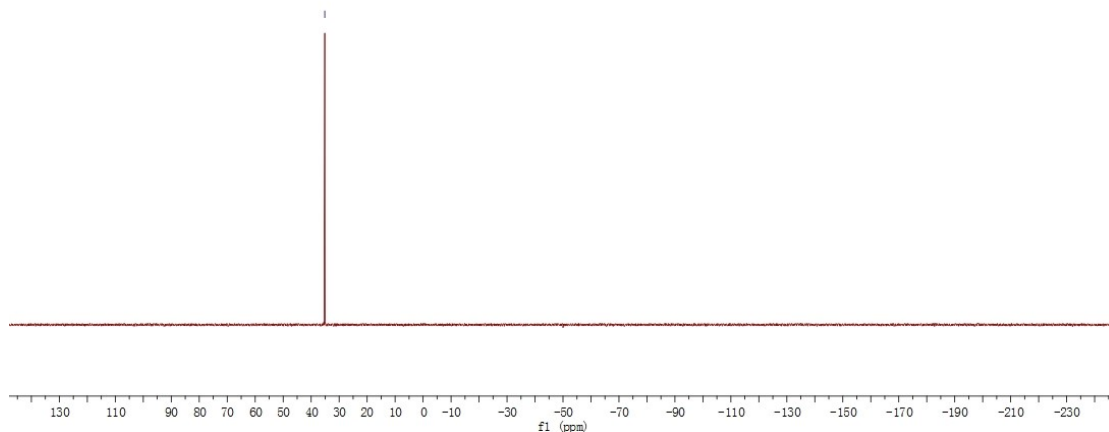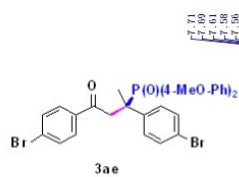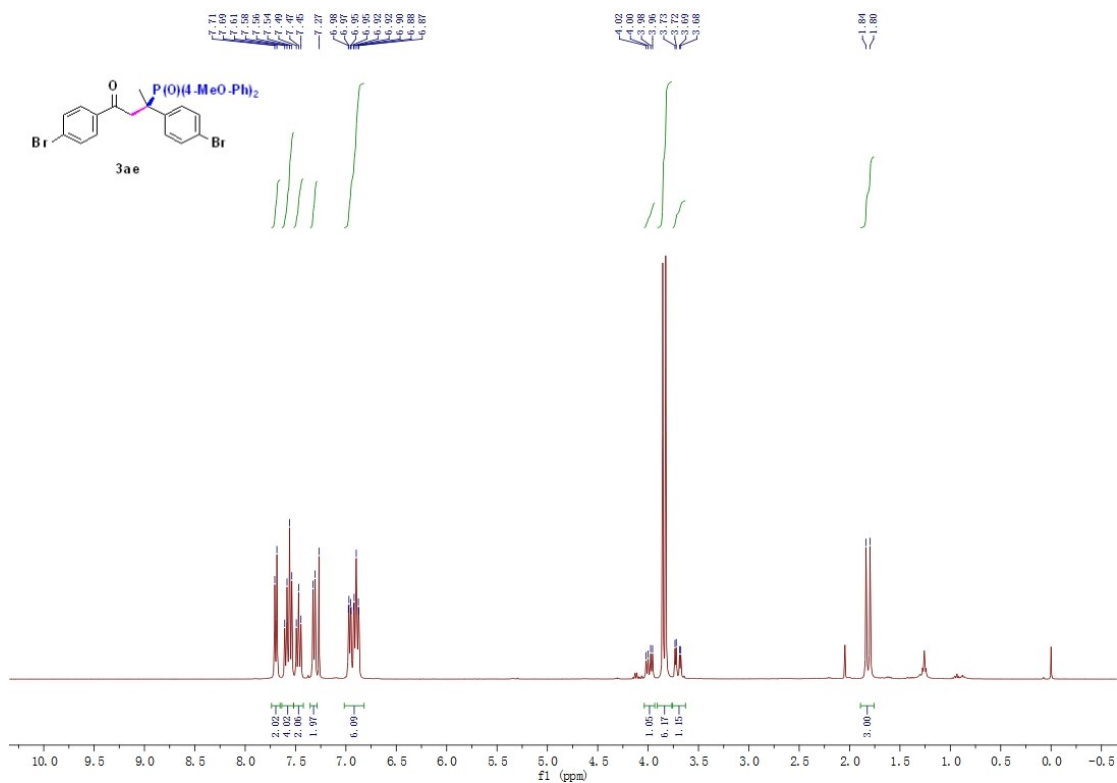

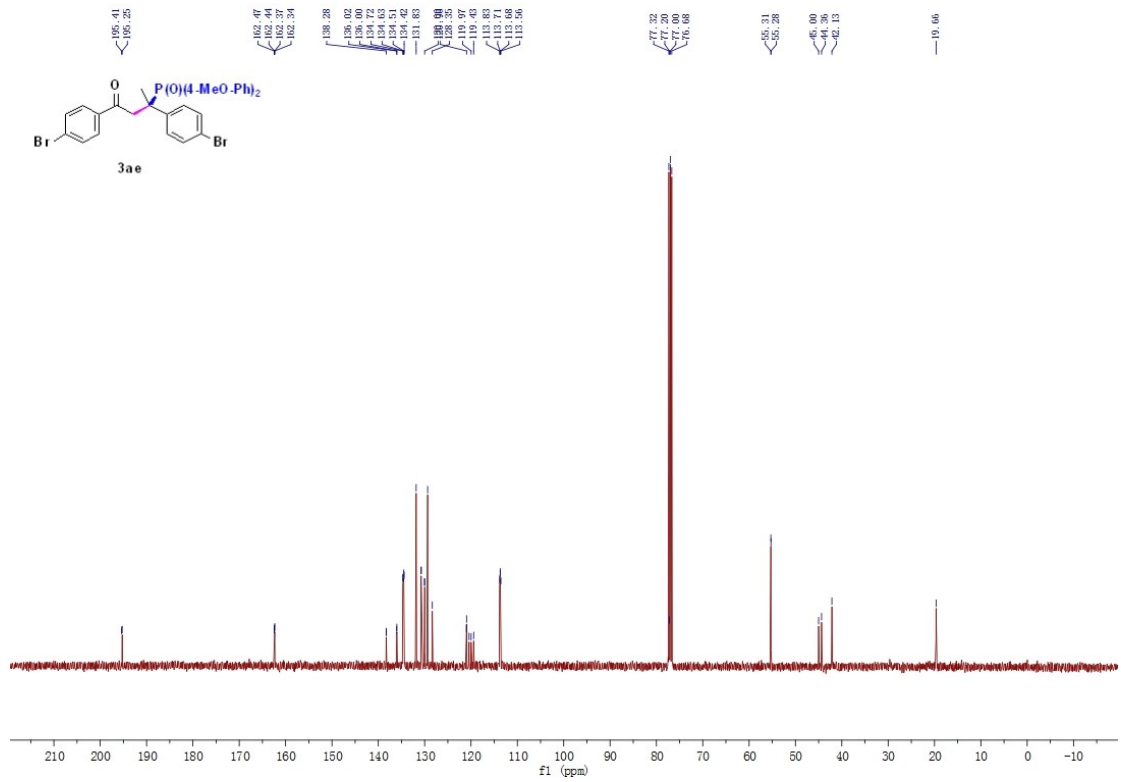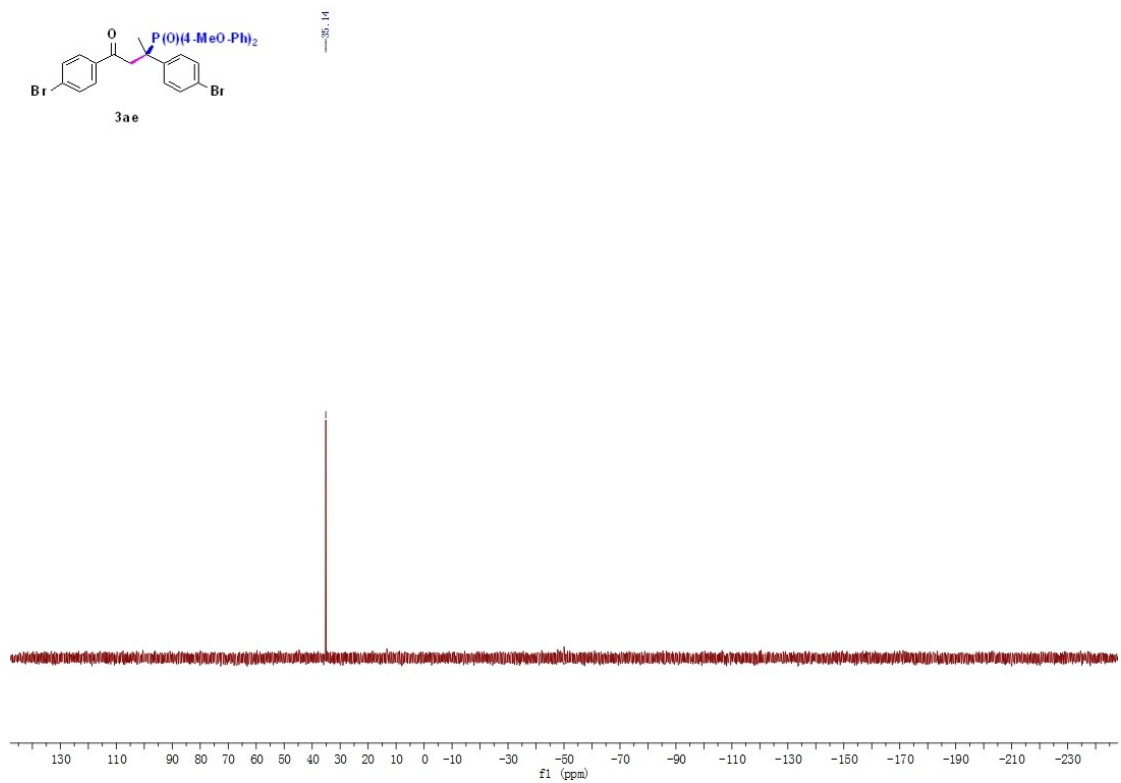

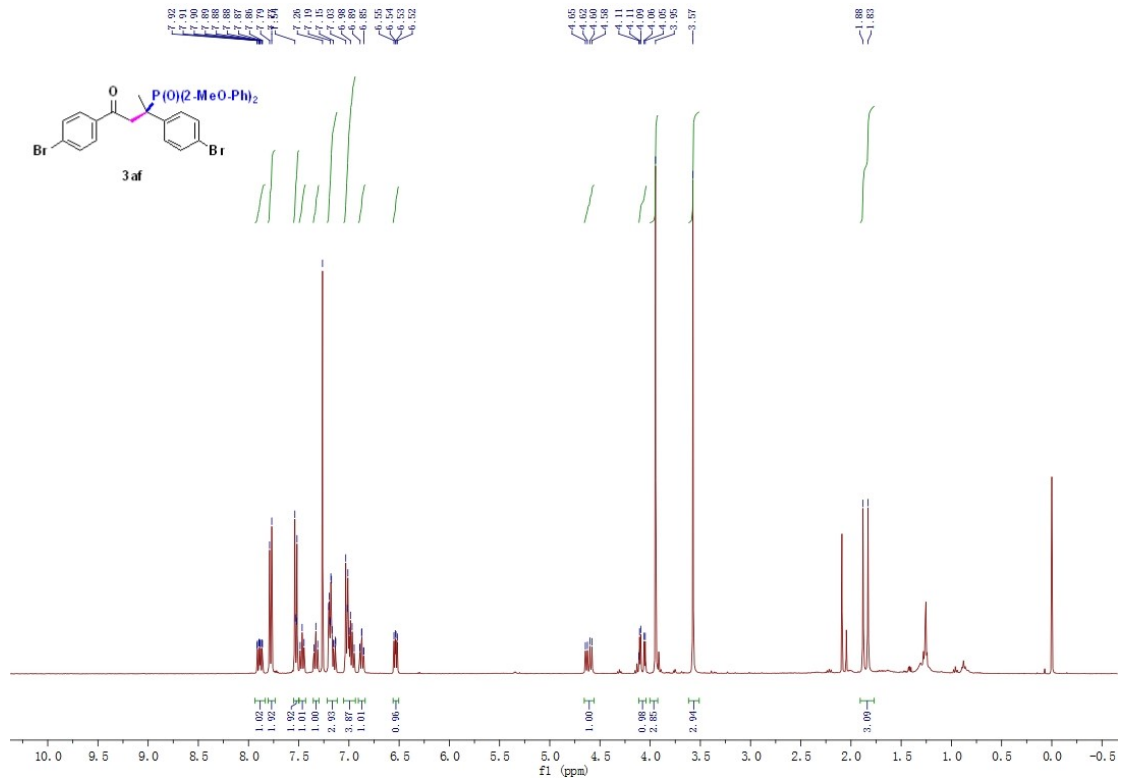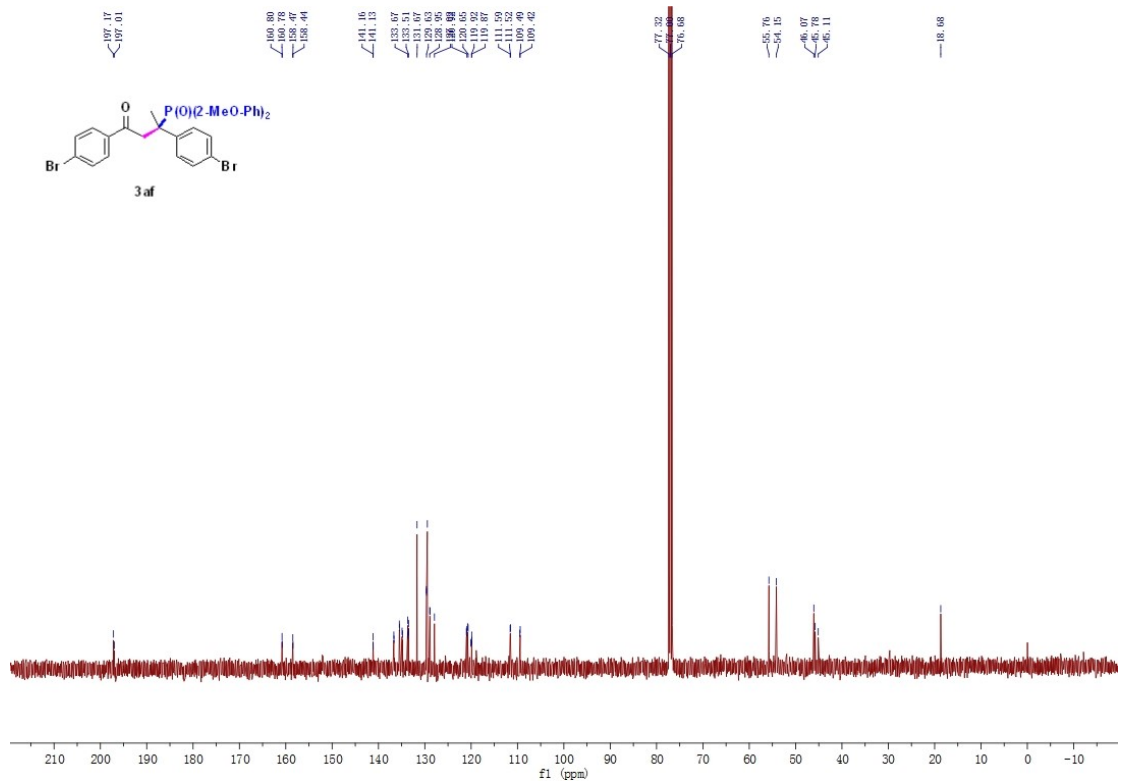

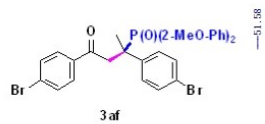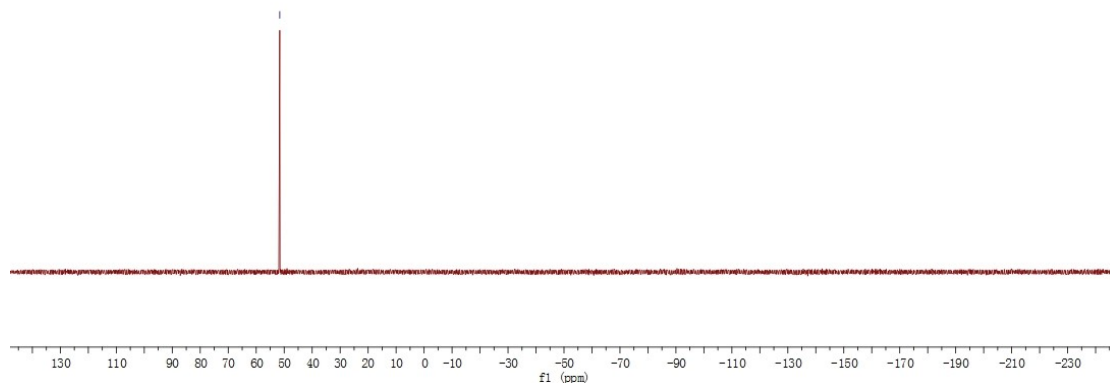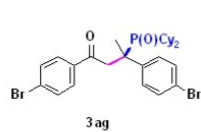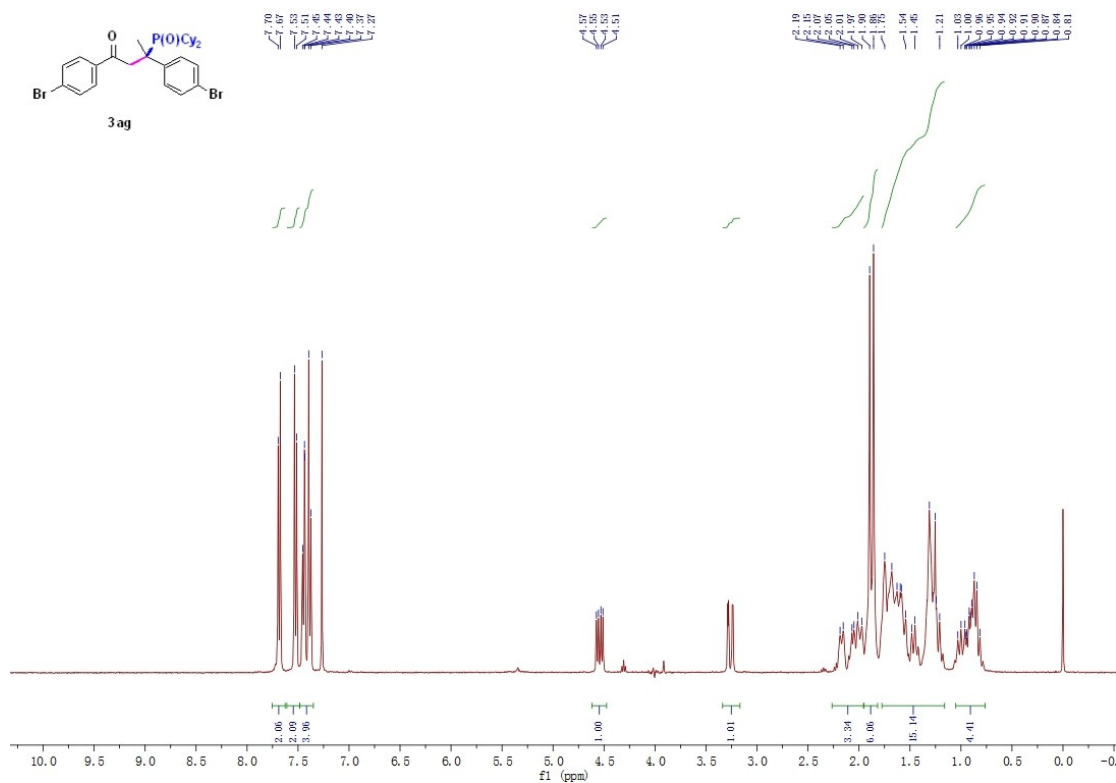





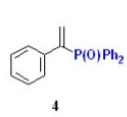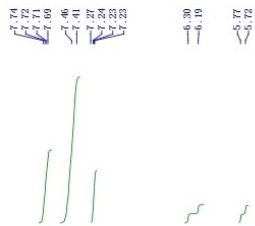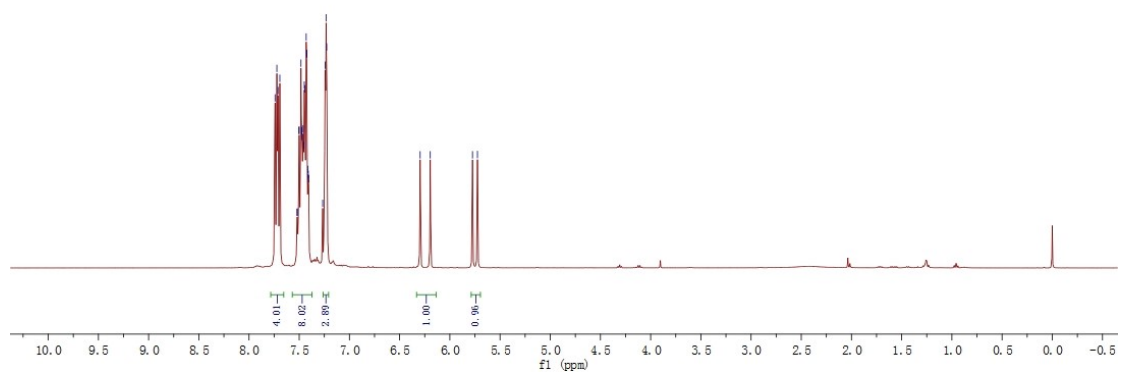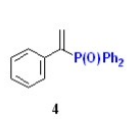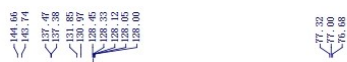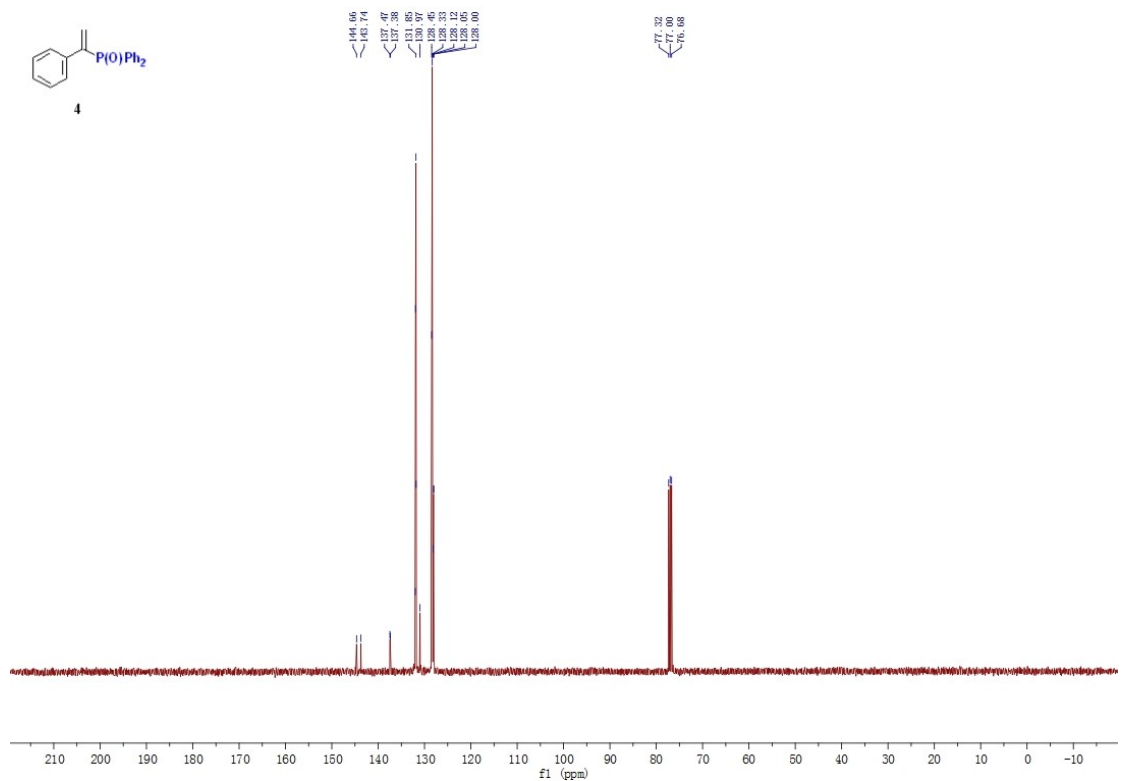



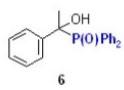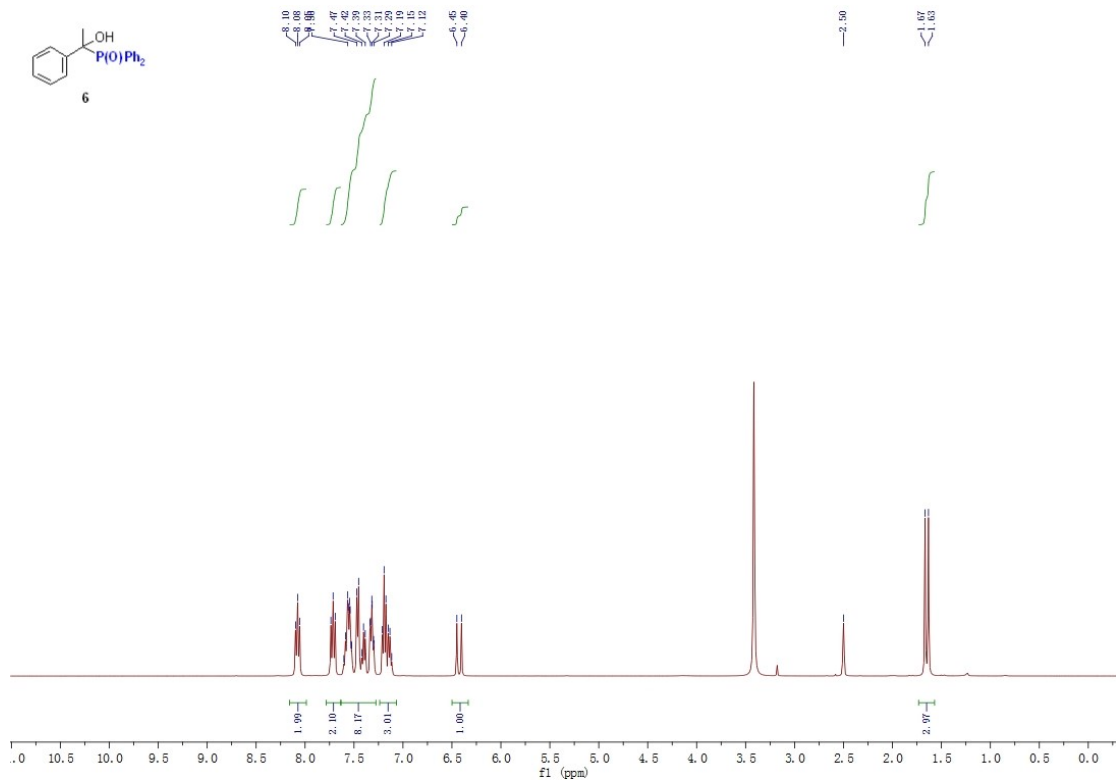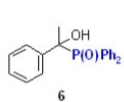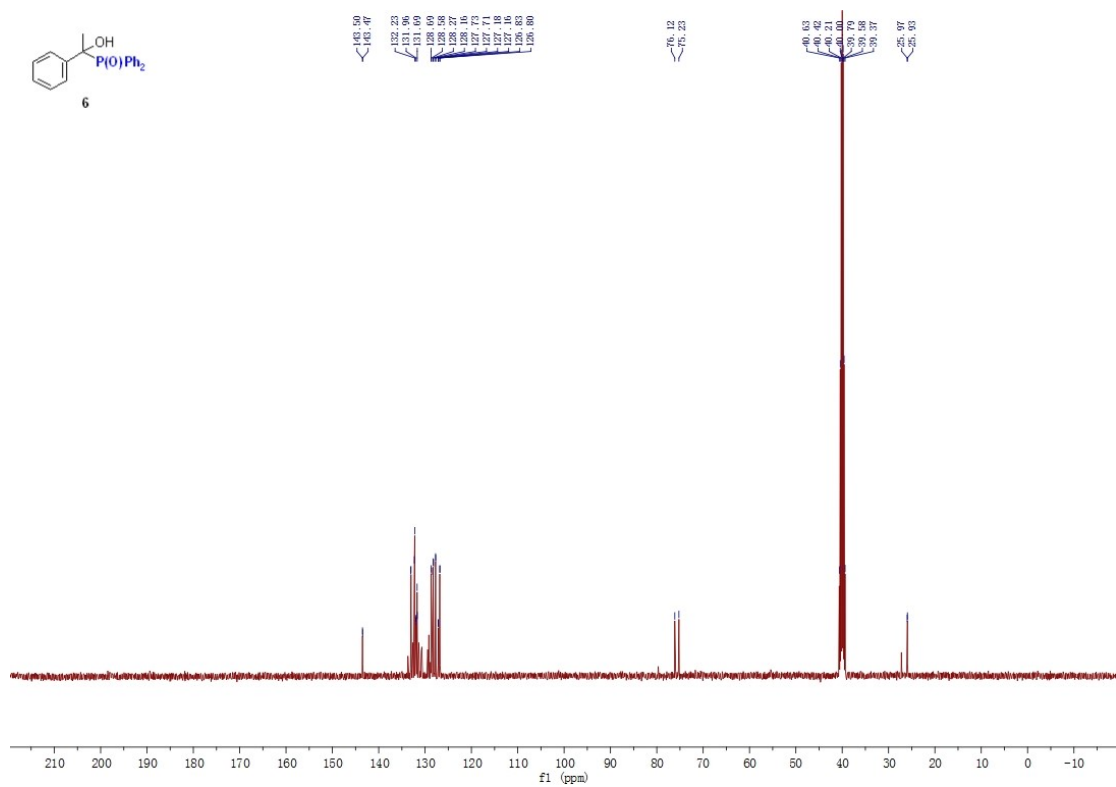

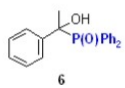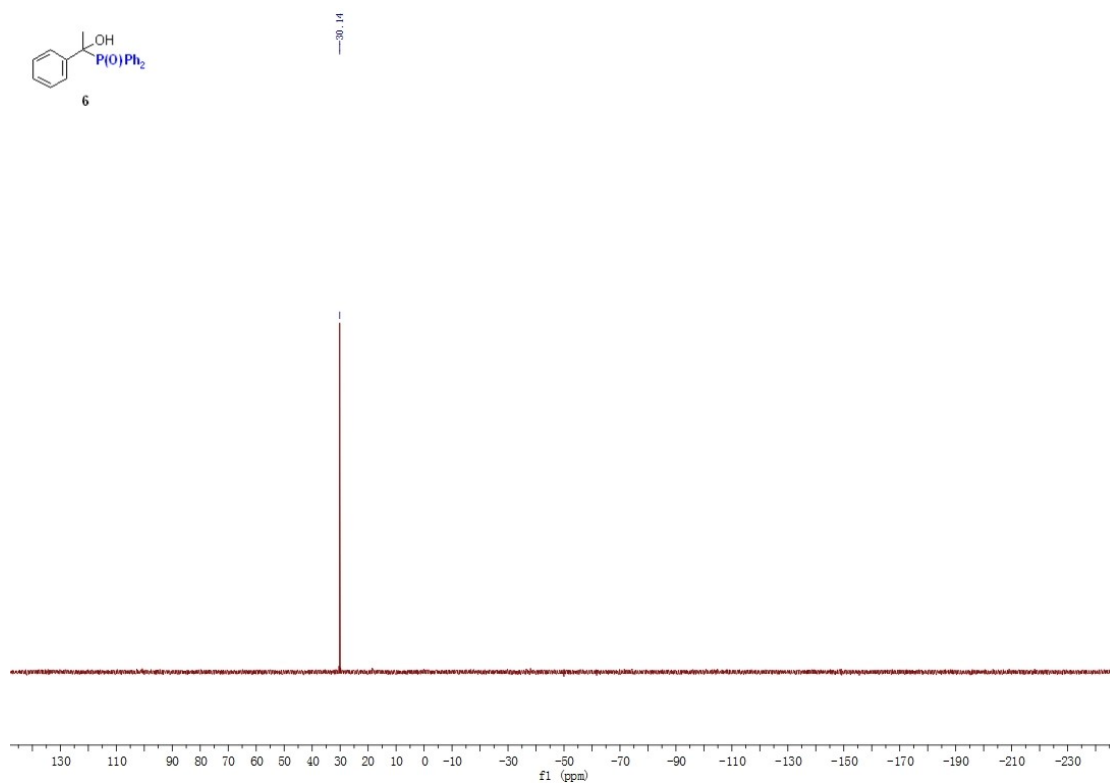

Supplement: d2qo01749k1.pdf [file d2qo01749k1.pdf]
